# Supplementary material for: Improving chronic pain management with eHealth and mHealth: study protocol for a randomised controlled trial
Source: PubMed Central journal article supplement — BMJ Open. 2019 Dec 29;9(12):e033586. doi: 10.1136/bmjopen-2019-033586 (PMC6937108; doi:10.1136/bmjopen-2019-033586), 2019-12-29
Supplement: bmjopen-2019-033586.draft_revisions.pdf [file bmjopen-2019-033586.draft_revisions.pdf]

# BMJ Open

BMJ Open is committed to open peer review. As part of this commitment we make the peer review history of every article we publish publicly available.

When an article is published we post the peer reviewers' comments and the authors' responses online. We also post the versions of the paper that were used during peer review. These are the versions that the peer review comments apply to.

The versions of the paper that follow are the versions that were submitted during the peer review process. They are not the versions of record or the final published versions. They should not be cited or distributed as the published version of this manuscript.

BMJ Open is an open access journal and the full, final, typeset and author-corrected version of record of the manuscript is available on our site with no access controls, subscription charges or pay-per-view fees (<http://bmjopen.bmj.com>).

If you have any questions on BMJ Open's open peer review process please email [info.bmjopen@bmj.com](mailto:info.bmjopen@bmj.com)

# BMJ Open

## Improving chronic pain management with eHealth and mHealth: study protocol for a randomized controlled trial

|                               |                                                                                                                                                                                                                                                                                                                                                 |
|-------------------------------|-------------------------------------------------------------------------------------------------------------------------------------------------------------------------------------------------------------------------------------------------------------------------------------------------------------------------------------------------|
| Journal:                      | <i>BMJ Open</i>                                                                                                                                                                                                                                                                                                                                 |
| Manuscript ID                 | bmjopen-2019-033586                                                                                                                                                                                                                                                                                                                             |
| Article Type:                 | Protocol                                                                                                                                                                                                                                                                                                                                        |
| Date Submitted by the Author: | 12-Aug-2019                                                                                                                                                                                                                                                                                                                                     |
| Complete List of Authors:     | Jaén, Irene; Universitat Jaume I, Basic Psychology, Clinical Psychology and Psychobiology<br>Suso-Ribera, Carlos; Universitat Jaume I<br>Castilla, Diana; Universidad de Zaragoza<br>Zaragoza, Irene; Instituto de Salud Carlos III<br>García-Palacios, Azucena; Universitat Jaume I<br>Gómez Palones, Jose Luis; Hospital General de Castellon |
| Keywords:                     | chronic pain, ecological momentary assessment, ehealth, mhealth, telemonitoring                                                                                                                                                                                                                                                                 |
|                               |                                                                                                                                                                                                                                                                                                                                                 |

SCHOLARONE™  
Manuscripts

1  
2  
3  
4  
5  
6  
7  
8  
9  
10  
11  
12  
13  
14  
15  
16  
17  
18  
19  
20  
21  
22  
23  
24  
25  
26  
27  
28  
29  
30  
31  
32  
33  
34  
35  
36  
37  
38  
39  
40  
41  
42  
43  
44  
45  
46  
47  
48  
49  
50  
51  
52  
53  
54  
55  
56  
57  
58  
59  
60

1 **Title:** Improving chronic pain management with eHealth and mHealth: study protocol  
2 for a randomized controlled trial

4 **Running Head:** Telemonitoring of pain by Pain Monitor App

6 **Authors:** Irene Jaén<sup>1,a</sup>, Carlos Suso-Ribera<sup>1</sup>, Diana Castilla<sup>2,3</sup>, Irene Zaragoza<sup>3</sup>,  
7 Azucena García-Palacios<sup>1,3</sup> and José Luis Gómez Palonés<sup>4</sup>

9 <sup>1</sup> Universitat Jaume I, Castelló 12007, Spain

10 <sup>2</sup> Universidad de Zaragoza, Teruel 44003, Spain

11 <sup>3</sup> CIBER of Physiopathology of Obesity and Nutrition CIBERobn, CB06/03 Instituto de  
12 Salud Carlos III, Spain

13 <sup>4</sup> Hospital General Universitari de Castelló, 12004, Spain

15 <sup>a</sup> Corresponding author. Universitat Jaume I. Facultad de Ciencias de la Salud.

16 Departamento de Psicología Básica, Clínica y Psicobiología. Avda. Vicente Sos Baynat  
17 s/n. Castellón de la Plana E-12071 Spain

18 ijaen@uji.es

20 Trial Sponsor: Universitat Jaume I.: Avda. Vicente Sos Baynat, s/n Castellón de la  
21 Plana E-12071 Spain; **Telephone:** +34 964 38 74 80; e-mail: ocit@uji.es

23 Word count: 3757

24 **Protocol Amendment Number:** 01

|             |          |
|-------------|----------|
| 2019-July-8 | Original |
|-------------|----------|

28

**29 Abstract**

30 *Introduction:* Chronic pain has become a matter of concern for public health due to its  
31 high prevalence and because public costs associated with treatment and disability  
32 increase each year. Research suggests that limitations in the traditional assessment of  
33 chronic pain patients limit the effectiveness of current medical treatments. The use of  
34 technology might serve change patient traditional monitoring into Ecological  
35 Momentary Assessments, which might be visualized by physicians live. This study  
36 describes a Randomized Control Trial designed to test the utility of a technology-based  
37 solution for pain telemonitoring consisting of a smartphone app for patients and a web  
38 application for physicians. The goal of this study will be to explore whether this  
39 combination of eHealth and mHealth improves the effectiveness of existing pain  
40 treatments.

41 *Methods and analysis:* Participants will be 250 patients randomly assigned to one of  
42 these two conditions: treatment as usual (TAU) and TAU+app+web. All participants will  
43 receive the usual treatment for their pain. Only in the TAU+app+web group alarms will  
44 be generated by the Pain Monitor app in the face of previously established undesired  
45 events. Physicians will be able to monitor app reports using a web application, which  
46 might result in an adjustment of treatment. We anticipate that the use of Pain Monitor  
47 plus the therapist web will result in a reduction of pain intensity and side effects of the  
48 medication. Improvements on secondary outcomes, namely fatigue, mood, pain  
49 interference, rescue medication use, and quality of life, are also expected. Mixed  
50 repeated-measure MANOVAs will be conducted to investigate whether there are  
51 differences between pre- and post-assessment scores as a function of the  
52 experimental condition.

53 *Ethics and dissemination:* Ethical approval from the Hospital General Universitari de  
54 Castellon was obtained. The findings will be published in peer-reviewed journals.

55 *Trial registration:* NCT03606265. The trial is active and recruitment is ongoing.

1  
2  
3 56  
4

57 **Keywords:** Chronic pain, ecological momentary assessment, ehealth, mhealth,  
58 telemonitoring.

9 59  
10

### 11 60 **Strengths and limitations of this study**

- 13 61 – To the best of our knowledge, this is the first randomized, controlled clinical trial  
14 62 to test the effectiveness of the implementation of an integrative technology-  
15 63 based solution for chronic pain that provides support to patients and physicians.
- 16 64 – The results obtained from this study may have important implications for the  
17 65 personalization of pain treatments and to enhance the effectiveness and safety  
18 66 of pain interventions.
- 19 67 – A study limitation is that physicians who participate in the investigation are not  
20 68 blinded to the participants' assigned condition since they need to respond to  
21 69 alarms generated by the app.
- 22 70 – An additional shortcoming is that the results will not necessarily be  
23 71 generalizable to all pain patients but only to those who met the eligibility criteria  
24 72 for the study. This excludes patients not using a smartphone with Internet  
25 73 connection (e.g., some older adults).

26 74  
27

### 28 75 **Introduction**

29 76 Pain can be defined as “an unpleasant sensory and emotional experience associated  
30 77 with actual or potential tissue damage, or described in terms of such damage” [1] and  
31 78 can only be understood as an interplay between “sensory, emotional, cognitive, and  
32 79 social components” [2]. Although pain often is acute and disappears as tissues heal,  
33 80 sometimes pain persists for long periods of time and becomes chronic. For instance, it  
34 81 has been reported that 15% of individuals admitted to trauma hospitals due to a severe  
35 82 injury and up to 60% of patients after surgery will continue to experience severe

1  
2  
3 83 chronic pain months and years later [3]. In general, a cut-off of 3 to 6 months is used to  
4  
5 84 define the transition from acute/subacute to chronic pain [4].  
6

7 85 The aforementioned chronification of pain is becoming a major public health problem  
8  
9 86 across the globe [5]. Specifically, epidemiological studies indicate that the prevalence  
10  
11 87 of this disease in the adult population ranges from 19% to 38% worldwide [6–9].  
12

13 88 Furthermore, the increase in life expectancy and the ageing of the population is likely to  
14  
15 89 have an important impact on the number of individuals experiencing chronic pain, since  
16  
17 90 the prevalence of this syndrome boosts dramatically with age [9]. For instance, it is  
18  
19 91 expected that the population of chronic pain individuals will be doubled in 2050 for  
20  
21 92 people older than 65 years and tripled for people over 80 years of age [10].  
22  
23

24 93 As a result of the growing concern about this disease, there have been numerous  
25  
26 94 attempts to improve treatments for pain in the past decades. However, recent reviews  
27  
28 95 on the effectiveness of numerous interventions, including medical treatments,  
29  
30 96 psychological therapy, physical rehabilitation, or a combination of these indicate that  
31  
32 97 the effectiveness of existing treatments is, on average, only modest [11–13]. While  
33  
34 98 there might be numerous factors explaining the limited effectiveness of current  
35  
36 99 interventions for pain, including unexplored biomechanical mechanisms or genetic  
37  
38 100 factors, patient characteristics, or therapists' training, some authors have pointed to  
39  
40 101 methodological shortcomings as key elements explaining the modest effectiveness of  
41  
42 102 pain interventions. Specifically, the way assessment is currently performed (i.e., a  
43  
44 103 single measure of pain intensity performed episodically during onsite appointments)  
45  
46 104 has been argued to impact negatively in the ability of existing interventions to achieve  
47  
48 105 more reliable and powerful changes in patient outcomes [14,15]. For instance, a single  
49  
50 106 rate of pain intensity has been shown to be an unreliable measure of pain as this  
51  
52 107 experience can vary dramatically within the same day and across days [16–18]. In  
53  
54 108 addition, pain is frequently assessed retrospectively, which is known to lead to recall  
55  
56 109 bias and to decrease the accuracy of pain ratings [19] and does not allow for timely  
57  
58  
59  
60

1  
2  
3 110 responses to undesired events, so these often take place time after the problem  
4  
5 111 occurred [20].  
6  
7 112 As a consequence of the above, Ecological Momentary Assessment (EMA), which  
8  
9 113 refers to the assessment of pain repeatedly and in real life, has received renewed  
10  
11 114 interest in the past years in the pain literature and is now considered by many as the  
12  
13 115 gold standard method to assess the pain experience [19,21–24]. Traditionally, EMA  
14  
15 116 has been difficult due to the limitations and costs of repeated measurement procedures  
16  
17 117 (i.e., paper diaries or phone calls). However, with the explosion and availability of  
18  
19 118 smartphones, EMA has become easier than ever and immediate communication  
20  
21 119 between the patient and the physician is now a more feasible practice [25].  
22  
23  
24 120 It has been argued that this change in the assessment paradigm towards ecological  
25  
26 121 daily telemonitoring using apps will improve treatment effectiveness and reduce costs if  
27  
28 122 used to respond to patient reports quickly [14,26]. Indeed, there is evidence to suggest  
29  
30 123 that smartphones are useful tools to be used for the assessment of pain core outcome  
31  
32 124 measures in chronic pain settings [14,27,28]. However, the extent to which this EMA of  
33  
34 125 pain patients can effectively lead to better practices in pain medicine is still unknown.  
35  
36 126 For this purpose, we developed a technology-based solution that integrated a pain and  
37  
38 127 symptom tracking app for patients and a web for physicians where app-generated  
39  
40 128 alarms are received daily and patient app responses can be monitored in real time. To  
41  
42 129 the best of our knowledge, no study has yet investigated the utility of using such an  
43  
44 130 integrative technology-based solution for remote, ecological monitoring of patient  
45  
46 131 evolution and to adjust treatment in response to app alarms in a randomized controlled  
47  
48 132 trial.  
49  
50  
51 133 With the previous goal in mind, in the present parallel group, 1:1 superiority trial we will  
52  
53 134 use the *Pain Monitor* app  
54  
55 135 (<https://play.google.com/store/apps/details?id=painmonitor.srccode>), which was  
56  
57 136 developed by a team of psychologists and an engineer with the collaboration of  
58  
59 137 physicians and nurses and has been recently validated in clinical settings [14], together  
60

1  
2  
3 138 with a web for the physicians where app responses and alarms can be tracked in real  
4  
5 139 time to facilitate the professional's decision-making process. As we will explain in more  
6  
7 140 detail in the Methods section, Pain Monitor assesses a number of pain-related  
8  
9 141 outcomes (i.e., pain intensity, pain interference, anxiety and depression and use of  
10  
11 142 pain-related health resources) and the most frequent side effects of medical treatments  
12  
13 143 for pain. In the study, patients will be randomly assigned to a treatment as usual  
14  
15 144 condition (TAU) or to a TAU with the support of the patients' app and the physician's  
16  
17 145 web. We anticipate that the use of the web application linked with the smartphone app  
18  
19 146 (TAU+app+web condition) will improve the effectiveness of usual treatments resulting  
20  
21 147 in reduced pain intensity and less frequent side effects of the medication after one  
22  
23 148 month of medical treatment. Additionally, we expect that this group of patients will  
24  
25 149 present additional improvements on secondary outcomes, including mood (depression  
26  
27 150 and anxiety), pain interference, pain catastrophizing, and use of pain-related health  
28  
29 151 resources in the past month.  
30  
31  
32  
33

## 34 153 **Method**

### 35 154 *Study design*

36  
37 155 The current investigation is a randomized superiority clinical trial composed of two  
38  
39 156 parallel groups (1:1 allocation ration): a) TAU and b) TAU+app+web. In the study,  
40  
41 157 participants in the TAU condition receive the usual pain treatment by the physicians  
42  
43 158 working at the pain unit (i.e., pharmacological treatment or infiltration). Participants  
44  
45 159 included in TAU+app+web group receive the usual treatment for their pain plus daily  
46  
47 160 monitoring of their symptoms and pain experience with the Pain Monitor app during  
48  
49 161 one month. In the TAU+app+web condition, alarms are generated in the presence of  
50  
51 162 previously established undesired events, which have been previously determined by  
52  
53 163 the physicians at the pain clinic. Physicians are able to monitor these patients' app  
54  
55 164 reports using a web application created for this purpose  
56  
57  
58 165 (<https://monitordolor.dolortic.com/>). Thus, phone calls can be conducted in the  
59  
60



1  
2  
3 166 presence of alarms in order to change or discontinue the medical treatment when  
4  
5 167 necessary. If the study results indicate that the use of technology leads to better  
6  
7 168 outcomes, participants in the TAU condition will be informed about these findings and  
8  
9 169 will be offered the possibility to use the app after study participation. In the TAU  
10  
11 170 condition only, assessment is performed as usual, that is, using self-report measures  
12  
13 171 administered onsite at the beginning and the end of the study (1 month later).  
14  
15 172 Neither the physicians nor the patients will be blind to the treatment condition assigned.  
16  
17 173 Physicians will not be blind because they will receive alarms from the TAU+app+web  
18  
19 174 participants only. Patients will not be blind because only those in the TAU+app+web  
20  
21 175 condition will be using technology in addition to usual treatment and because patients  
22  
23 176 in the TAU condition must know that there is no telemonitoring in their condition.  
24  
25 177 The trial was registered at [clinicaltrials.gov](http://clinicaltrials.gov) in September 2018 (NCT03606265). All  
26  
27 178 items from the World Health Organization Trial Registration Data Set are showed in the  
28  
29 179 Supplementary file 1. The recruitment started at the end of the same month. SPIRIT  
30  
31 180 guidelines (Standard Protocol Items: Recommendations for Interventional Trials) were  
32  
33 181 followed to design the trial. The participant timeline (i.e., schedule of enrolment,  
34  
35 182 interventions, and assessments) is shown in Figure 1. Recruitment is currently ongoing  
36  
37 183 and is expected to end in November 2019.  
38  
39  
40  
41  
42  
43  
44

#### 186 *Sample*

45  
46  
47 187 Participants will be 250 consecutive chronic pain patients attending the pain clinic at  
48  
49 188 the Hospital General Universitari de Castello (Spain) for the first time. Required sample  
50  
51 189 size was calculated using G\*Power [29]. Although the a priori calculation resulted in  
52  
53 190 198 participants, the sample size was increased to 250 considering a dropout rate of  
54  
55 191 27-30% based on previous studies [30,31]. Thus, 125 participants were assigned to  
56  
57 192 each condition. Randomization of participants was performed by an independent  
58  
59  
60

1  
2  
3 193 researcher using a computer-generated sequence with *Randomizer* [32]. Inclusion  
4  
5 194 criteria are shown in Table 1.  
6

7 195

8  
9 196 Table 1. Inclusion criteria

---

12 The patient is over 18 years of age

14 The patient has a mobile phone with Android operating system (the app is  
15 currently only available for Android, which is the operating system used by more  
16 than 80% of users in Spain) [33].  
17  
18

19 The patient has the physical ability to use the application

22 The patient does not present psychological and/or cognitive alterations or  
23 problems with language that make his/her participation difficult  
24

26 The patient voluntarily wants to participate and signs the informed consent form  
27

---

28  
29 197

31 198 In the study, all participants are identified using an alphanumeric code. In the case of  
32  
33 199 participants in the TAU+app+web condition, this code is automatically generated by the  
34  
35 200 app. Thus, the database generated by the app is anonymized and the app only collects  
36  
37 201 the international mobile equipment identity (IMEI). The association between app codes  
38  
39 202 and patient identifiable characteristics is stored locally at the pain clinic. All data  
40  
41 203 storage procedures follow the European law and data protection rules (European  
42  
43 204 Union General Data Protection Regulation 2016/679 of the European Parliament and of  
44  
45 205 the Council of 27 April 2016). In addition, ethical approval from the Hospital General  
46  
47 206 Universitari de Castello was obtained, in accordance with the Declaration of Helsinki.  
48  
49 207 Important protocol modifications will be notified and require the approval of the Ethics  
50  
51 208 Committee of the Hospital General Universitari de Castello. Approved changes will be  
52  
53 209 made public at [clinicaltrials.gov](http://clinicaltrials.gov). All the participants read and sign an informed consent  
54  
55 210 form before randomization (see Supplementary file 2). Patients who do not agree with  
56  
57 211 the assigned condition, are given the opportunity to be allocated to the preferred  
58  
59  
60

1  
2  
3 212 condition, but are not used in the analyses. Any changes to modify the assigned  
4  
5 213 condition are accepted at any time during the study, again resulting in an exclusion  
6  
7 214 from the study. Changes in the medication or improvement of disease are do not result  
8  
9 215 in study discontinuation. Disease worsening is not expected to be associated with the  
10  
11 216 inclusion of the app but, if existent, will result in the discontinuation of app use.  
12  
13  
14 217

15  
16 218 *Procedure*

17  
18 219 The study is conducted at the pain clinic of the Hospital General Universitari de  
19  
20 220 Castelló. The study is advertised by physicians to all consecutive patients attending the  
21  
22 221 pain clinic for the first time. To ensure enrolment, physicians will emphasize the  
23  
24 222 importance of active patient participation in research in general and in self-monitoring  
25  
26 223 in particular. Patients interested in participating are directed to another office where the  
27  
28 224 lead author, I.J., explains the study procedures in more detail and ensures their  
29  
30 225 eligibility. I.J. is in charge of increasing adherence to the treatment (i.e., app) by  
31  
32 226 explaining the utility of the study and by contacting patients when an alarm informing of  
33  
34 227 low app adherence (i.e., more than three consecutive days without response) is  
35  
36 228 received. All participants are provided with an information sheet and sign the informed  
37  
38 229 consent. After participation acceptance, participants are assigned to one of the  
39  
40 230 experimental conditions (TAU or TAU+app+web), which had been previously  
41  
42 231 randomized by an external researcher. All participants then complete a paper-and-  
43  
44 232 pencil assessment protocol in order to control for differences between the two  
45  
46 233 assessment formats (app vs. pen and pencil) and to compare both conditions using the  
47  
48 234 same assessment approach. In addition to this paper-and-pencil evaluation, patients in  
49  
50 235 the TAU+app+web condition download and install the Pain Monitor app into their  
51  
52 236 phones. Once they install the app, they answer to an initial assessment and then  
53  
54 237 complete two measures daily (10 am and 7 pm) during one month (study duration).  
55  
56 238 Finally, an end of study appointment is set (one month later) to conduct the post-  
57  
58  
59  
60

1  
2  
3 239 assessment evaluation. Due to difficulties in transportation or availability, the post-  
4  
5 240 assessment intervention can either be completed onsite or via an on-line survey.  
6

7 241

8  
9 242 *Pain monitor*

10  
11 243 The Pain Monitor app (Figure 2) has been developed by a group of pain psychologists  
12  
13 244 and an engineer, with the collaboration of physicians and nurses specialized in pain  
14  
15 245 care. Pain Monitor is composed of several pain-related items which are to be answered  
16  
17 246 twice a day at preset times (10 am and 7 pm, with a two-hour flexibility) during 30 days.  
18  
19 247 The app content has been previously validated with chronic pain patients at the pain  
20  
21 248 unit of the Vall d'Hebron Hospital [14]. This assessment protocol contains  
22  
23 249 sociodemographic items (i.e., age, sex, and education level, among others) which are  
24  
25 250 evaluated on the first day of app use only, as well as a number of pain-related  
26  
27 251 outcomes that are evaluated daily, which have been selected following recent  
28  
29 252 guidelines on core outcome domains for pain treatments [34,35]. Constructs in the app,  
30  
31 253 including pain intensity, pain interference, anxiety, depression, catastrophizing, social  
32  
33 254 support, acceptance, and coping, among others, are measured with a single item to  
34  
35 255 reduce the burden of daily assessment, each of which was adapted and validated  
36  
37 256 against well-established paper-and-pencil measures [14]. Additionally, the assessment  
38  
39 257 protocol includes a list of side effects created *ad hoc* based on the literature findings on  
40  
41 258 the most frequent adverse effects of pain treatments [36,37], as well as measures of  
42  
43 259 treatment adherence, use of rescue medication, neuropathic characteristics of pain,  
44  
45 260 and use of medical services in the past month. All app items can be found in  
46  
47 261 Supplementary file 3.  
48  
49

50  
51  
52 262 The app generates alarms in the presence of predefined events (see Supplementary  
53  
54 263 file 4 for the alarms set in the present study in collaboration with the participating  
55  
56 264 physicians). These alarms are sent to the physicians early in the morning on working  
57  
58 265 days so that they can decide whether an action from their side is required (e.g., calling  
59  
60

1  
2  
3 266 the patient and setting an earlier appointment or suggesting a change in the  
4  
5 267 medication). For this study, a website linked to the app was created for the physicians  
6  
7 268 to observe patient alarms and evolution live. Examples of the physician web are  
8  
9 269 presented in Figure 3.

10  
11 270

### 12 13 271 *Interventions*

14  
15 272 Five physicians at the pain clinic of the Hospital General Universitari de Castelló  
16  
17 273 participate in this study. All patients in the study receive the usual treatment for their  
18  
19 274 pain irrespective of their assigned condition. However, a change in treatment might  
20  
21 275 occur in the TAU+app+web condition at the discretion of the physicians in charge of  
22  
23 276 treatment after receiving an alarm and consulting the web page with the graphical  
24  
25 277 representation of patient app responses. As usual, patients in the TAU condition  
26  
27 278 without the app are not contacted by the physicians between appointments. It is  
28  
29 279 important to note that both patients in the TAU only and patients in the TAU+app+web  
30  
31 280 condition are allowed to attend to the emergency services or the family physician in the  
32  
33 281 event of an emergency at any stage of the study due to ethical reasons. At the end of  
34  
35 282 the study, this practice is investigated for each participant in the final assessment.

36  
37 283

### 38 39 284 *Assessment plan*

40  
41 285 All participants in the study fill in a number of questionnaires in a paper-and-pencil  
42  
43 286 format at the beginning and at the end of the study. This assessment protocol includes  
44  
45 287 sociodemographic information, use of pain-related health resources in the past week  
46  
47 288 (i.e., emergency services, family physician, or pain clinic), pain-related physical  
48  
49 289 symptoms experienced in the past week (i.e., side medication effects), the Brief Pain  
50  
51 290 Inventory (pain severity and interference) [39], the Pain Catastrophizing Scale [40], and  
52  
53 291 the Hospital Anxiety and Depression Scale [41]. In addition to this paper-and-pencil  
54  
55 292 evaluation, participants in the TAU+app+web condition also install the Pain Monitor app  
56  
57 293 and complete a pre-intervention assessment in the app after the paper-and-pencil

1  
2  
3 294 evaluation. Both baseline assessments include the same content and are duplicated to  
4  
5 295 provide further evidence for the validity of app content. After this pretreatment  
6  
7 296 evaluation, participants in the TAU+app+web group are asked to answer to the app  
8  
9 297 assessments twice a day during one month (study duration). A push-up system notifies  
10  
11 298 the patient about the need to respond to the app evaluation at 10:00 am and 7:00 pm.  
12  
13 299 These times can be adjusted by the patient with a 2-hour flexibility from the preset  
14  
15 300 times.

16  
17 301 Daily morning and evening assessments differ in a number of items. Some items are  
18  
19 302 asked twice a day (i.e., pain intensity, sadness, anxiety), while others are only  
20  
21 303 administered in the morning (e.g., interference of pain on sleep) or in the evening (e.g.,  
22  
23 304 activity level during the day, interference of pain on daily activities, or physical  
24  
25 305 symptoms experienced during the day).

26  
27 306 Finally, 30 days after the treatment onset (i.e., first evaluation), both groups complete a  
28  
29 307 post-assessment protocol. The measures included in this final evaluation are similar to  
30  
31 308 the ones included in the baseline assessment, with the inclusion of a measure of  
32  
33 309 negative events experienced during the study period and the evaluation of perceived  
34  
35 310 change due to treatment.

36  
37 311 In the study, primary outcomes are pain intensity and the number of side effects of the  
38  
39 312 medication reported in the app, while secondary outcomes include mood (depression  
40  
41 313 and anxiety), pain interference, pain catastrophizing, and use of pain-related health  
42  
43 314 resources in the past month.

44  
45 315 Note that app reports in the TAU+app+web condition are not used to determine  
46  
47 316 treatment effectiveness compared to the TAU only condition because in the latter  
48  
49 317 condition participants do not use the app. Therefore, app responses are only used for  
50  
51 318 telemonitoring and early detection of treatment problems that result in an alarm to the  
52  
53 319 physicians. The comparison of both conditions will be made using the traditional paper-  
54  
55 320 and-pencil evaluations which will be available for both groups.  
56  
57  
58  
59  
60 321

1  
2  
3 322 *Patient and public Involvement*  
4

5 323 In the current study, patients or the public will not be involved in the design, or conduct,  
6  
7 324 or dissemination of the research.  
8

9 325

10  
11 326 *Data analysis*  
12

13 327 The aim of the present study is to explore the effect of an integrated technology-based  
14  
15 328 solution for chronic pain monitoring (an app that monitors pain patients daily and sends  
16  
17 329 clinical alarms to physicians and a web for physicians that graphically represents  
18  
19 330 patient evolution as reported in the app) compared to the usual treatment where  
20  
21 331 monitoring is made using a paper-and-pencil, episodic, onsite evaluation. With this aim  
22  
23 332 in mind, and intention-to-treat analyses will be performed following the  
24  
25 333 recommendations of the CONSORT guidelines (<http://www.consort-statement.org/>).  
26  
27

28 334 First, the two conditions will be compared at baseline in the different continuous  
29  
30 335 measures with a between-group analysis via a *t*-test to ensure that randomization  
31  
32 336 indeed resulted in comparable groups prior to intervention. Chi-squared tests will be  
33  
34 337 used for all the categorical variables. To evaluate our hypothesis, mixed repeated-  
35  
36 338 measure MANOVAs will be conducted to investigate whether there are differences  
37  
38 339 between pre- and post-assessment scores as a function of the experimental condition  
39  
40 340 (TAU or TAU+app+web). Distribution normality and homoscedasticity assumptions will  
41  
42 341 be tested by means of Kolmogorov-Smirnov and Levene tests, respectively, and a  
43  
44 342 Mann-Whitney *U* test and Brown-Forsythe *F*-test will be used where necessary. Effect  
45  
46 343 size will be calculated to complement the MANOVA results with the standardized mean  
47  
48 344 difference (Cohen's *d*) for both between and within group analyses. This is a novel  
49  
50 345 study and effect sizes are difficult to anticipate. However, we expect to find larger (i.e.  
51  
52 346 moderate) between-groups effect sizes for primary outcomes (i.e., pain intensity and  
53  
54 347 number of side effects of the medication) when compared to secondary outcomes  
55  
56 348 since medical interventions do not specifically focus on these symptoms (i.e., pain  
57  
58 349 interference, mood, fatigue, rescue medication use, and quality of life). The analysis will  
59  
60

1  
2  
3 350 be performed by CSR, who will be blinded to the treatment allocation. Only the present  
4  
5 351 study authors will have access to the final trial dataset.

6  
7 352 Regarding dropouts, we will choose a strict criterion and the analyses will only include  
8  
9 353 participants who complete both the pre and the post assessments. Because of the  
10  
11 354 short duration of the trial (one month per patient) and the minimal risks expected from  
12  
13 355 the use of the app, a data monitoring committee will not be required.  
14  
15

16 356

## 17 357 **Discussion**

18  
19 358 Chronic pain is a major public health challenge due to its high prevalence in the  
20  
21 359 population and high direct and indirect costs for the institutions and the individuals [42,  
22  
23 360 43]. Pain assessment is a complex process characterized by a high variability between  
24  
25 361 and within days, which is usually performed by clinicians using self-report, onsite,  
26  
27 362 single ratings which are based on recall [39,40]. EMA using smartphone apps appears  
28  
29 363 to be an innovative and promising alternative to these traditional assessment methods  
30  
31 364 [46] as smartphone apps have demonstrated to be accurate tools to assess pain  
32  
33 365 intensity and related variables from the patients' home, thus facilitating telemonitoring  
34  
35 366 and contributing to the personalization of medical interventions by rapidly adjusting  
36  
37 367 treatments to every individual as a result of telemonitoring [19].

38  
39 368 In the present study protocol, we describe a randomized controlled trial designed to  
40  
41 369 test an integrative technology-based solution for chronic pain monitoring consisting of a  
42  
43 370 web application for the healthcare professional which is linked to the patient's app (i.e.,  
44  
45 371 Pain Monitor). Specifically, we want to explore whether the use of this integrative  
46  
47 372 technology improves the effectiveness of the usual treatment for this population thanks  
48  
49 373 to telemonitoring and the rapid detection of unwanted events. We expect that the use  
50  
51 374 of Pain monitor, with the support of therapist's web, will result in reduced pain intensity  
52  
53 375 and less frequent side effects of the medication after one month of medical treatment  
54  
55 376 due to the professional's rapid reaction in the presence of undesired outcomes.  
56  
57  
58  
59  
60



1  
2  
3 377 To our knowledge, this is the first study to assess the effectiveness of this type of  
4  
5 378 integrative technology solution (i.e., a therapist web site linked to a patient smartphone  
6  
7 379 app) for the telemonitoring of patient symptomatology in chronic pain. If our hypothesis  
8  
9 380 is confirmed, our findings will serve to demonstrate the feasibility and utility of  
10  
11 381 smartphones and specialized webs for therapists so that they can be implemented in  
12  
13 382 specialized care contexts (i.e., pain clinics). Likewise, our results will provide important  
14  
15 383 information about the potential benefits of smartphone apps for the personalization of  
16  
17 384 pain treatments (i.e., treatment can be rapidly personalized to a given patient as a  
18  
19 385 function of individual responses reported in the app). Ultimately, this might help change  
20  
21 386 the model of care for this chronic disease (i.e., episodic, onsite assessment and  
22  
23 387 treatment), since the use of this integrative technology system allows for a continuous  
24  
25 388 and remote evaluation and intervention, providing a faster response to the patient  
26  
27 389 needs and improving self-management and empowerment of patients who attend pain  
28  
29 390 clinics as they become important agents of treatment effectiveness by being in charge  
30  
31 391 of daily reporting of pain-related experiences in the app. In sum, the results of the  
32  
33 392 present investigation could serve an important first step towards the implementation of  
34  
35 393 apps and other Information and Communication Technologies in health services.  
36  
37  
38  
39  
40

#### 41 395 **List of Abbreviations**

42  
43 396 TAU = Treatment as usual; EMA = Ecological Momentary Assessment; IMEI =  
44  
45 397 International Mobile Equipment Identity; SPIRIT = Standard Protocol Items  
46  
47 398 Recommendations for Interventional Trials; CONSORT = Consolidated Standards of  
48  
49 399 Reporting Trials; MANOVA = Multivariate Analysis of Variance.  
50

51 400

52 401

#### 53 402 **References**

54  
55  
56  
57  
58  
59 403 1. Merskey H. Classification of chronic pain: Descriptions of chronic pain syndromes  
60

- 1  
2  
3 404 and definitions of pain terms. *Pain*. 1986;3:226.  
4  
5  
6 405 2. Williams AC de C, Craig KD. Updating the definition of pain. *Pain*. 2016;157:2420–3.  
7  
8 406 doi:10.1097/j.pain.0000000000000613.  
9  
10  
11 407 3. Lavand'homme P. The progression from acute to chronic pain. *Curr Opin*  
12  
13 408 *Anaesthesiol*. 2011;24:545–50. doi:10.1097/ACO.0b013e32834a4f74.  
14  
15  
16 409 4. Treede R-D, Rief W, Barke A, Aziz Q, Bennett MI, Benoliel R, et al. A classification  
17  
18 410 of chronic pain for ICD-11. *Pain*. 2015;156:1. doi:10.1097/j.pain.0000000000000160.  
19  
20  
21 411 5. Bevan S, Quadrello T, Mcgee R, Mahdon M, Vavrovsky A, Barham L. Fit for Work  
22  
23 412 pain-European report. 2009.  
24  
25  
26 413 6. Breivik H, Collett B, Ventafridda V, Cohen R, Gallacher D. Survey of chronic pain in  
27  
28 414 Europe: Prevalence, impact on daily life, and treatment. *Eur J Pain*. 2006;10:287–287.  
29  
30 415 doi:10.1016/j.ejpain.2005.06.009.  
31  
32  
33 416 7. Larsson C, Hansson EE, Sundquist K, Jakobsson U. Chronic pain in older adults:  
34  
35 417 prevalence, incidence, and risk factors. *Scand J Rheumatol*. 2017;46:317–25.  
36  
37  
38 418 8. Nahin RL. Estimates of pain prevalence and severity in adults: United States, 2012.  
39  
40 419 *J Pain*. 2015;16:769–80.  
41  
42  
43 420 9. Häuser W, Wolfe F, Henningsen P, Schmutzer G, Brähler E, Hinz A. Untying chronic  
44  
45 421 pain: Prevalence and societal burden of chronic pain stages in the general population -  
46  
47 422 A cross-sectional survey. *BMC Public Health*. 2014;14:1–8.  
48  
49  
50 51  
52 423 10. Miró J, Paredes S, Rull M, Queral R, Miralles R, Nieto R, et al. Pain in older adults:  
53  
54 424 a prevalence study in the Mediterranean region of Catalonia. *Eur J Pain*. 2007;11:83–  
55  
56 425 92. doi:10.1016/j.ejpain.2006.01.001.  
57  
58  
59 426 11. Vincent GE, Velkoff VA. The next four decades the older population in the United  
60

- 1  
2  
3 427 States : 2010 to 2050. 2010.  
4  
5  
6 428 12. Geneen LJ, Moore RA, Clarke C, Martin D, Colvin LA, Smith BH. Physical activity  
7  
8 429 and exercise for chronic pain in adults: an overview of Cochrane Reviews. Cochrane  
9  
10 430 database Syst Rev. 2017;1:CD011279.  
11  
12  
13 431 13. Gatchel RJR, McGeary DD, McGeary CAC, Lippe B. Interdisciplinary chronic pain  
14  
15 432 management: past, present, and future. *Am Psychol*. 2014;69:119–30.  
16  
17 433 doi:10.1037/a0035514.  
18  
19  
20 434 14. Hughes LS, Clark J, Colclough JA, Dale E, McMillan D. Acceptance and  
21  
22 435 Commitment Therapy (ACT) for Chronic Pain: A Systematic Review and Meta-  
23  
24 436 Analyses. *Clin J Pain*. 2017;33:552–68.  
25  
26  
27 437 15. Suso-Ribera C, Castilla D, Zaragoza I, Ribera-Canudas MV, Botella C, Garcia-  
28  
29 438 Palacios A. Validity, Reliability, Feasibility, and Usefulness of Pain Monitor: A  
30  
31 439 Multidimensional Smartphone App for Daily Monitoring of Adults With Heterogenous  
32  
33 440 Chronic Pain. *Clin J Pain*. 2018;34:900–8.  
34  
35  
36  
37 441 16. Dansie EJ, Turk DC. Assessment of patients with chronic pain. *Br J Anaesth*.  
38  
39 442 2013;111:19–25.  
40  
41  
42 443 17. Kikuchi H, Yoshiuchi K, Miyasaka N, Ohashi K, Yamamoto Y, Kumano H, et al.  
43  
44 444 Reliability of recalled self-report on headache intensity: Investigation using ecological  
45  
46 445 momentary assessment technique. *Cephalalgia*. 2006;26:1335–43.  
47  
48  
49 446 18. Jensen MP, McFarland CA. Increasing the reliability and validity of pain intensity  
50  
51 447 measurement in chronic pain patients. *Pain*. 1993;55:195–203.  
52  
53  
54 448 19. Kratz AL, Murphy SL, Braley TJ. Ecological Momentary Assessment of Pain,  
55  
56 449 Fatigue, Depressive, and Cognitive Symptoms Reveals Significant Daily Variability in  
57  
58 450 Multiple Sclerosis. *Arch Phys Med Rehabil*. 2017. doi:10.1016/j.apmr.2017.07.002.  
59  
60

- 1  
2  
3 451 20. García-Palacios A, Herrero R, Belmonte MA, Castilla D, Guixeres J, Molinari G, et  
4  
5 452 al. Ecological momentary assessment for chronic pain in fibromyalgia using a  
6  
7 453 smartphone: A randomized crossover study. *Eur J Pain*. 2014;18:862–72.  
8  
9 454 doi:10.1002/j.1532-2149.2013.00425.x.  
10  
11  
12 455 21. Suso-Ribera C, Mesas Á, Medel J, Server A, Márquez E, Castilla D, et al.  
13  
14 456 Improving pain treatment with a smartphone app: study protocol for a randomized  
15  
16 457 controlled trial. *Trials*. 2018;19:145. doi:10.1186/s13063-018-2539-1.  
17  
18  
19 458 22. Lin W-C, Burke L, Schlenk EA, Yeh CH. Use of an Ecological Momentary  
20  
21 459 Assessment Application to Assess the Effects of Auricular Point Acupressure for  
22  
23 460 Chronic Low Back Pain. *Comput Inform Nurs*. 2018.  
24  
25  
26 461 23. Shiffman S, Stone AA, Hufford MR. Ecological Momentary Assessment. *Annu Rev*  
27  
28 462 *Clin Psychol*. 2008;4:1–32. doi:10.1146/annurev.clinpsy.3.022806.091415.  
29  
30  
31 463 24. Stone AA, Shiffman S. Ecological momentary assessment (EMA) in behavioral  
32  
33 464 medicine. *Ann Behav Med*. 1994;16:199–202.  
34  
35  
36 465 25. Smyth JM, Stone AA. Ecological Momentary Assessment Research in Behavioral  
37  
38 466 medicine. *J Happiness Stud*. 2003;4:35–52. doi:10.1023/A:1023657221954.  
39  
40  
41 467 26. May M, Junghaenel DU, Ono M, Stone AA, Schneider S. Ecological Momentary  
42  
43 468 Assessment Methodology in Chronic Pain Research: A Systematic Review. *J Pain*.  
44  
45 469 2018;19:699–716. doi:10.1016/j.jpain.2018.01.006.  
46  
47  
48 470 27. Moore J. The benefits of mobile apps for patients and providers. *Br J Healthc*  
49  
50 471 *Manag*. 2012;18:465–7.  
51  
52  
53 472 28. Reynoldson C, Stones C, Allsop M, Gardner P, Bennett MI, Closs SJ, et al.  
54  
55 473 Assessing the Quality and Usability of Smartphone Apps for Pain Self-Management.  
56  
57 474 *Pain Med*. 2014;15:898–909.

- 1  
2  
3 475 29. Rosser BA, Eccleston C. Smartphone applications for pain management. J  
4  
5 476 Telemed Telecare. 2011;17:308–12.  
6  
7  
8 477 30. Faul F, Erdfelder E, Lang A-G, Buchner A. G\*Power 3: A flexible statistical power  
9  
10 478 analysis program for the social, behavioral, and biomedical sciences. Behav Res  
11  
12 479 Methods. 2007;39:175–91. doi:10.3758/BF03193146.  
13  
14  
15 480 31. Kristjansdottir OB, Fors EA, Eide E, Finset A, Stensrud TL, van Dulmen S, et al. A  
16  
17 481 smartphone-based intervention with diaries and therapist-feedback to reduce  
18  
19 482 catastrophizing and increase functioning in women with chronic widespread pain:  
20  
21 483 randomized controlled trial. J Med Internet Res. 2013;15:e5.  
22  
23  
24 484 32. Macea DD, Gajos K, Daglia Calil YA, Fregni F. The Efficacy of Web-Based  
25  
26 485 Cognitive Behavioral Interventions for Chronic Pain: A Systematic Review and Meta-  
27  
28 486 Analysis. J Pain. 2010;11:917–29. doi:10.1016/j.jpain.2010.06.005.  
29  
30  
31 487 33. Urbaniak, GC and Plous S. Research randomizer (version 4.0)[computer software].  
32  
33 488 Social Psychology Network. 2013.  
34  
35  
36  
37 489 34. Share. KWPSO sales market. No Title.  
38  
39  
40 490 35. Dworkin RH, Turk DC, Farrar JT, Haythornthwaite JA, Jensen MP, Katz NP, et al.  
41  
42 491 Core outcome measures for chronic pain clinical trials: IMMPACT recommendations.  
43  
44 492 Pain. 2005;113:9–19. doi:10.1016/j.pain.2004.09.012.  
45  
46  
47  
48 493 36. Kaiser U, Kopkow C, Deckert S, Neustadt K, Jacobi L, Cameron P, et al.  
49  
50 494 Developing a core outcome domain set to assessing effectiveness of interdisciplinary  
51  
52 495 multimodal pain therapy: the VAPAIN consensus statement on core outcome domains.  
53  
54 496 Pain. 2018;159:673–83.  
55  
56  
57 497 37. Attal N, Cruccu G, Baron R, Haanpää M, Hansson P, Jensen TS, et al. EFNS  
58  
59 498 guidelines on the pharmacological treatment of neuropathic pain: 2010 revision. Eur J  
60

- 1  
2  
3 499 Neurol. 2010;17:1113-e88. doi:10.1111/j.1468-1331.2010.02999.x.  
4  
5  
6 500 38. Varrassi G, Müller-Schwefe G, Pergolizzi J, Orónska a, Morlion B, Mavrocordatos  
7  
8 501 P, et al. Pharmacological treatment of chronic pain - the need for CHANGE. Curr Med  
9  
10 502 Res Opin. 2010;26:1231–45. doi:10.1185/03007991003689175.  
11  
12  
13 503 39. Cleeland CS, Ryan KM. Pain assessment: global use of the Brief Pain Inventory.  
14  
15 504 Ann Acad Med Singapore. 1994;23:129–38.  
16  
17 505 <http://europepmc.org/abstract/MED/8080219>.  
18  
19  
20  
21 506 40. Sullivan MJLMJL, Bishop SRS, Pivik J. The pain catastrophizing scale:  
22  
23 507 development and validation. Psychol Assess. 1995;7:524–32. doi:10.1037/1040-  
24  
25 508 3590.7.4.524.  
26  
27  
28 509 41. Zigmond AS, Snaith RP. The hospital anxiety and depression scale. Acta Psychiatr  
29  
30 510 Scand. 1983;67:361–70. <http://www.ncbi.nlm.nih.gov/pubmed/6880820>. Accessed 11  
31  
32 511 Jul 2014.  
33  
34  
35 512 42. Breivik H, Eisenberg E, O'Brien T. The individual and societal burden of chronic  
36  
37 513 pain in Europe: The case for strategic prioritisation and action to improve knowledge  
38  
39 514 and availability of appropriate care. BMC Public Health. 2013;13.  
40  
41  
42  
43 515 43. Frieem CH, Willweber-Strumpf A, Zenz MW. Chronic pain in primary care. German  
44  
45 516 figures from 1991 and 2006. BMC Public Health. 2009;9:1–9.  
46  
47  
48 517 44. Gorin, A. A., & Stone AA. Recall biases and cognitive errors in retrospective self-  
49  
50 518 reports: A call for momentary assessments. In: Baum A, Revenson T, J. Singer,  
51  
52 519 editors. Handbook of health psycholog. Mahwah, NJ: Lawrence Erlbaum; 2001. p.  
53  
54 520 405–13.  
55  
56  
57 521 45. Schwarz N. Retrospective and Concurrent Self-Reports: The Rationale for Real-  
58  
59 522 Time Data Capture. In: A. Stone, S. S. Shiffman, A. Atienza & LN, editor. The science

1  
2  
3 523 of real-time data capture: Self-reports in health research. New York: Oxford University  
4  
5 524 Pres; 2007. p. 11–26.  
6  
7

8 525 46. Alexander J, Joshi G. Smartphone applications for chronic pain management: a  
9  
10 526 critical appraisal. *J Pain Res.* 2016;9:731–4. doi:10.2147/JPR.S119966.  
11  
12

13  
14 527  
15

16  
17 528 **Author Statement:** All authors were strongly involved in the study conceptualization  
18  
19 529 and design and have reviewed and discussed the manuscript. IJ and CSR prepared  
20  
21 530 the first draft of the manuscript, which was then reviewed by AGP, DC, IZ, and JLG.  
22  
23 531 After changes were incorporated, a final version was approved by all authors. IJ and  
24  
25 532 JLG are currently in charge of recruitment and IJ and CSR will be in charge of data  
26  
27 533 analysis.  
28  
29

30  
31 534 **Funding:** Funded by *Plan de Promoción de la investigación Universitat Jaume I*. Ref  
32  
33 535 UJI-B2016-39 and a Predoctoral Grant (PREDOC/2017/26) by the Universitat Jaume I  
34  
35 536 to IJ. The first grant allowed for the development of the technological systems used in  
36  
37 537 the study (physician website and link to the app). The second grant serves to pay the  
38  
39 538 salary of the lead researcher and predoctoral candidate, IJ.  
40  
41

42 539 **Competing interests:** The intellectual property of the Pain Monitor app is owned by  
43  
44 540 co-authors CSR, DC, IZ, and AGP. These authors declare that they do not have any  
45  
46 541 competing interests to declare as they do not receive any financial gain from these  
47  
48 542 technologies.  
49  
50

51  
52 543 **Ethics approval and consent to participate:** Ethical approval from the Hospital  
53  
54 544 General Universitari de Castelló was obtained, in accordance with the Declaration of  
55  
56 545 Helsinki. All participants provided written informed consent to participate in the study.  
57  
58 546 The informed consent form was approved by the ethics committee of the Hospital  
59  
60 547 General Universitari de Castelló.

1  
2  
3 548  
4  
5

6 549 **FIGURES**  
7

8  
9 550 Figure 1. Study schedule of enrolment, interventions, and assessments.  
10  
11

12 551 Figure 2. a) Pain Monitor Instructions; b) Pain Monitor assessment of pain intensity; c)  
13  
14 552 Pain Monitor assessment of fatigue.  
15  
16

17 553 Figure 3. Examples of the web for the physician. a) Patient's side effects during 30  
18  
19 554 days. b) Patient morning values on Pain, Fatigue and Interference on sleep. c)  
20  
21 555 Distribution of patient side effects.  
22  
23

24  
25 556  
26  
27  
28  
29  
30  
31  
32  
33  
34  
35  
36  
37  
38  
39  
40  
41  
42  
43  
44  
45  
46  
47  
48  
49  
50  
51  
52  
53  
54  
55  
56  
57  
58  
59  
60



## STUDY PERIOD

|                           | <b>Pre-intervention</b> | <b>Intervention period</b> | <b>Close-out</b>           |
|---------------------------|-------------------------|----------------------------|----------------------------|
| <b>TIMEPOINT</b>          | <b>0</b>                | <b>T<sub>1</sub></b>       | <b>T<sub>2</sub></b>       |
|                           | <i>Pre-Intervention</i> | <i>Between assessments</i> | <i>One month follow-up</i> |
| <b>ENROLMENT:</b>         |                         |                            |                            |
| Eligibility screen        | X                       |                            |                            |
| Informed consent          | X                       |                            |                            |
| Allocation                | X                       |                            |                            |
| <b>INTERVENTIONS:</b>     |                         |                            |                            |
| Medical treatment         |                         | X                          |                            |
| App use                   |                         | App condition only         |                            |
| <b>ASSESSMENTS:</b>       |                         |                            |                            |
| Demographics              | X                       |                            | X                          |
| <b>Primary outcomes</b>   |                         |                            |                            |
| Pain intensity            | X                       | App condition only         | X                          |
| Physical symptoms         | X                       | App condition only         | X                          |
| <b>Secondary outcomes</b> |                         |                            |                            |
| Pain interference         | X                       | App condition only         | X                          |
| Mood                      | X                       | App condition only         | X                          |
| Fatigue                   | X                       | App condition only         | X                          |
| Rescue medication         | X                       | App condition only         | X                          |
| Quality of life           | X                       | App condition only         | X                          |

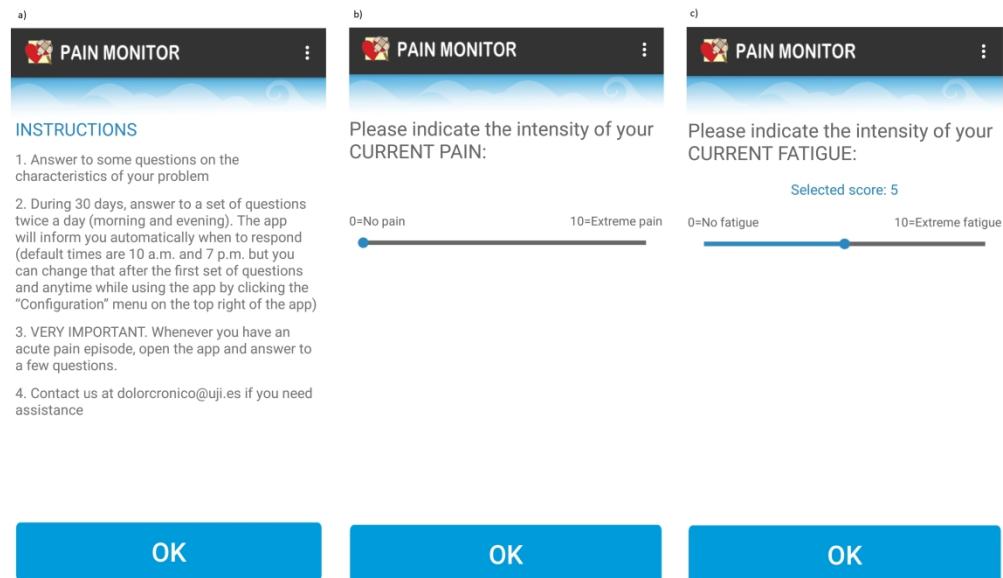

a) Pain Monitor Instructions; b) Pain Monitor assessment of pain intensity; c) Pain Monitor assessment of fatigue.

289x168mm (300 x 300 DPI)

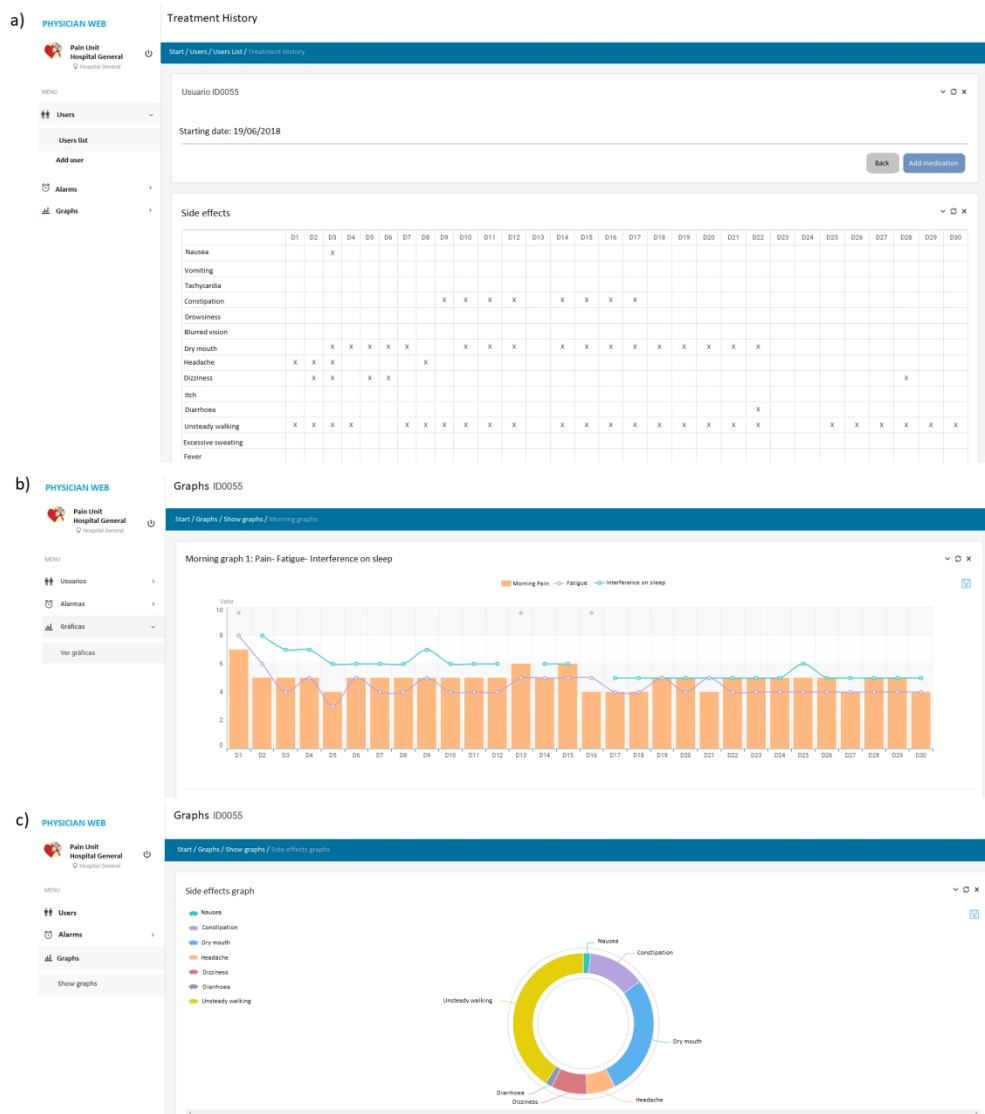

Examples of the web for the physician. a) Patient's side effects during 30 days. b) Patient morning values on Pain, Fatigue and Interference on sleep. c) Distribution of patient side effects.

168x189mm (300 x 300 DPI)

### Supplement 1. WHO registration dataset

| <b>Data category</b>                          | <b>Information</b>                                                                                                                                                                                                                                                                                                                                                                                                                                                                                                                                                                                                                                                                                                                                                                                                                                                                                                                                                                                                                        |
|-----------------------------------------------|-------------------------------------------------------------------------------------------------------------------------------------------------------------------------------------------------------------------------------------------------------------------------------------------------------------------------------------------------------------------------------------------------------------------------------------------------------------------------------------------------------------------------------------------------------------------------------------------------------------------------------------------------------------------------------------------------------------------------------------------------------------------------------------------------------------------------------------------------------------------------------------------------------------------------------------------------------------------------------------------------------------------------------------------|
| Primary registry and trial identifying number | ClinicalTrials.gov<br>NCT03606265                                                                                                                                                                                                                                                                                                                                                                                                                                                                                                                                                                                                                                                                                                                                                                                                                                                                                                                                                                                                         |
| Date of registration in primary registry      | July 30, 2018                                                                                                                                                                                                                                                                                                                                                                                                                                                                                                                                                                                                                                                                                                                                                                                                                                                                                                                                                                                                                             |
| Secondary identifying numbers                 | UJI-B2016-39,                                                                                                                                                                                                                                                                                                                                                                                                                                                                                                                                                                                                                                                                                                                                                                                                                                                                                                                                                                                                                             |
| Source(s) of monetary of material support     | Universitat Jaume I                                                                                                                                                                                                                                                                                                                                                                                                                                                                                                                                                                                                                                                                                                                                                                                                                                                                                                                                                                                                                       |
| Primary sponsor                               | Universitat Jaume I                                                                                                                                                                                                                                                                                                                                                                                                                                                                                                                                                                                                                                                                                                                                                                                                                                                                                                                                                                                                                       |
| Secondary sponsor(s)                          | None                                                                                                                                                                                                                                                                                                                                                                                                                                                                                                                                                                                                                                                                                                                                                                                                                                                                                                                                                                                                                                      |
| Contact for public queries                    | +34 964387640 azucena@uji.es                                                                                                                                                                                                                                                                                                                                                                                                                                                                                                                                                                                                                                                                                                                                                                                                                                                                                                                                                                                                              |
| Contact for scientific queries                | +34 964387649 ijaen@uji.es                                                                                                                                                                                                                                                                                                                                                                                                                                                                                                                                                                                                                                                                                                                                                                                                                                                                                                                                                                                                                |
| Public title                                  | Utility od a Web-based App for Chronic Pain                                                                                                                                                                                                                                                                                                                                                                                                                                                                                                                                                                                                                                                                                                                                                                                                                                                                                                                                                                                               |
| Scientific title                              | Improving chronic pain management with eHealth and mHealth: study protocol for a randomized controlled trial                                                                                                                                                                                                                                                                                                                                                                                                                                                                                                                                                                                                                                                                                                                                                                                                                                                                                                                              |
| Countries of recruitment                      | Spain                                                                                                                                                                                                                                                                                                                                                                                                                                                                                                                                                                                                                                                                                                                                                                                                                                                                                                                                                                                                                                     |
| Health condition(s) or problem(s) studied     | Chronic pain                                                                                                                                                                                                                                                                                                                                                                                                                                                                                                                                                                                                                                                                                                                                                                                                                                                                                                                                                                                                                              |
| Intervention(s)                               | Device: Treatment as usual+App+Web<br>Device: Treatment as usual                                                                                                                                                                                                                                                                                                                                                                                                                                                                                                                                                                                                                                                                                                                                                                                                                                                                                                                                                                          |
| Key inclusion and exclusion criteria          | <p>Inclusion Criteria:</p> <ul style="list-style-type: none"> <li>The patient is over 18 years of age</li> <li>The patient has a mobile phone with Android operating system</li> <li>The patient has the physical ability to use the application</li> <li>The patient does not present psychological and / or cognitive alterations or problems with language that make their participation difficult</li> <li>The patient voluntarily wants to participate and signs the informed consent</li> </ul> <p>Exclusion Criteria:</p> <ul style="list-style-type: none"> <li>The patient is under 18 years</li> <li>The patient does not have a mobile phone or has a mobile phone in which Android is not the operating system (the app is currently only available for Android for economic reasons)</li> <li>The patient does not have the physical capacity to use the application</li> <li>The patient does not have the capacity to participate due to psychological and / or cognitive alterations or problems with language</li> </ul> |

|                         |                                                                                                                                                                          |
|-------------------------|--------------------------------------------------------------------------------------------------------------------------------------------------------------------------|
|                         | The patient does not want to participate                                                                                                                                 |
| Study type              | Interventional                                                                                                                                                           |
| Date of first enrolment | August, 2018                                                                                                                                                             |
| Target sample size      | 250                                                                                                                                                                      |
| Recruitment status      | Ongoing                                                                                                                                                                  |
| Primary outcome(s)      | Changes in pain intensity and side effects                                                                                                                               |
| Key secondary outcomes  | Changes in pain-related variables as mood (depression and anxiety), pain interference, pain catastrophizing, and use of pain-related health resources in the past month. |

For peer review only

## Supplement 2: Study information sheet and informed consent

### INFORMATION ABOUT THE STUDY

You have shown your interest in participating in a scientific study of Universitat Jaume I and the Hospital General de Castellón. Your participation in the study is completely voluntary. You will then be asked to provide us with your written consent to participate in this study. There will be no inconvenience if you do not wish to participate and your decision will in no way affect the treatment received at the Hospital General de Castellón. In addition, you may discontinue your participation at any time. Please, read the following text carefully and do not hesitate to ask any questions.

#### Why is this study being carried out?

This study is part of a project called "DOLOR-TIC. Development and validation of an eHealth network for chronic pain" (REF: UJI-B2016-39) funded by the Plan de Promoción de la investigación Universitat Jaume I. The general objective of this project is to explore the benefits of using a network of technologies for the evaluation and treatment of chronic pain. The treatment by means of new technologies will be compared with the usual treatment provided in the pain unit of the Hospital General de Castellón.

#### What will be the procedure implemented in the study?

In the first sessions we will examine your state of health and check whether it meets the criteria for inclusion in the study. If you meet the established inclusion criteria, you will then be assigned to one of two study conditions: a) Habitual Treatment (TAU) or b) TAU supported by new technologies (TAU+ICTs). You will receive this treatment for 1 month and your clinical status will be evaluated before starting treatment, at the end of treatment (1 month). If, in fact, the treatments supported by the new technologies prove to be more effective than the usual treatment, you will be offered the possibility of benefiting from the treatment of new technologies at the end of the study, whether you were initially assigned to the TAU condition or to the TAU+TICs condition.

#### Are there any risks associated with my participation?

According to existing knowledge, the evaluation and treatment protocol used in this study does not pose risks to participants.

#### What are the possible benefits of my participation?

The treatment protocols included in this study are designed to improve your health. Your participation in this study will contribute to improving the health of a large number of citizens of the Spanish state. In addition, if the objectives of the study are achieved, the results will lead to a significant reduction in treatment costs and a

1  
2  
3 reduction in the increase in access to health services for a large number of people who  
4 do not have access to health services suffer from mental disorders.  
5

### 6 **How will my data be treated?**

7  
8 All data relevant to the study will be collected and stored in compliance with data  
9 protection regulations in force. These data will only be used anonymously for the  
10 purpose of scientific analysis. All persons involved in the study have an obligation to  
11 comply with data protection laws. We will make sure that all your information - without  
12 restrictions - is treated as in a confidential manner. Any data collected will be deleted as  
13 soon as it is not necessary for scientific purposes.  
14  
15  
16

### 17 **Can I decline or suspend my participation?**

18  
19 Yes, you may refuse to participate in this study or terminate your participation at any  
20 time. In the event that you decide to discontinue your participation in the study all of  
21 your data will be destroyed immediately.  
22  
23

### 24 **Who is the researcher responsible for the study?**

25  
26 Dr. Azucena García Palacios, Department of Basic Psychology, Clinic and  
27 Psychobiology, Universitat Jaume I (Castellón de la Plana), Tel: 964 387 640, E-mail:  
28 azucena@uji.es  
29

30  
31 You may contact the principal investigator if you have any questions, concerns about  
32 the study, about the data being collected, or if you wish to make use of your right to  
33 suspend your participation.  
34  
35  
36  
37  
38  
39  
40  
41  
42  
43  
44  
45  
46  
47  
48  
49  
50  
51  
52  
53  
54  
55  
56  
57  
58  
59  
60

## INFORMED CONSENT

Study DOLOR-TIC. Development and validation of an eHealth network for chronic pain. REF: UJI-B2016-39.

I (first name and last name) \_\_\_\_\_

- I have read the information sheet given to me.
- I was able to ask questions about the study.
- I have received enough information about the study.

I've been talking to: \_\_\_\_\_ (name of researcher).

I understand that my participation is voluntary.

I understand that I can withdraw from the study:

1. When I want to
2. Without having to give explanations
3. Without this affecting my medical care

I freely give my consent to participate in the study.

Date: .../.../...

Date: .../.../...

Participant's signature:

Researcher's signature:

### Revocation of consent:

I revoke the consent given on .../.../..... and I do not wish to continue in the study that

I give on this date for finished.

Signature of participant:

Signature of investigator:



### Supplement 3: Items in the Pain Monitor app

*Items assessed once, the first day of app use:*

1. Please indicate your date of birth (DD/MM/YYYY)
2. Please indicate your gender:
  - a. Male
  - b. Female
3. Please indicate your type of pain. You may select more than one option:
  - a. Fibromyalgia
  - b. Low back pain
  - c. Cervical pain
  - d. Rheumatoid arthritis
  - e. Osteoarthritis; Headache
  - f. Neuropathic pain
  - g. Cancer pain
  - h. None of the above
4. If you selected “None of the above” please indicate your type of pain. Otherwise, leave this question blank. Press OK to continue.
5. Please indicate the location where your pain is more intense:
  - a. Head
  - b. Shoulder
  - c. Neck
  - d. High back
  - e. Lower back
  - f. Arm
  - g. Elbow
  - h. Wrist
  - i. Hand
  - j. Abdomen
  - k. Chest
  - l. Buttock
  - m. Hip
  - n. Leg
  - o. Knee
  - p. Foot
  - q. Whole body
  - r. Somewhere not listed
6. Who is currently treating your pain? You may select more than one option:
  - a. General practitioner
  - b. Rheumatologist
  - c. Orthopedic specialist
  - d. Rehabilitation physician
  - e. Psychiatrist
  - f. Pain Unit

- 1  
2  
3 g. Neurosurgeon  
4 h. Neurologist  
5 i. Oncologist  
6 j. Another professional.  
7  
8  
9 7. When did your current pain start?  
10 a. Less than one year ago  
11 b. Between 1 and 5 years ago  
12 c. Between 5 and 10 years ago  
13 d. More than 10 years ago  
14  
15  
16 8. What is your current treatment for pain? You may select more than one option:  
17 a. Physiotherapy  
18 b. Pharmacotherapy  
19 c. Infiltrations  
20 d. Psychological treatment  
21 e. Natural / alternative treatments  
22 f. My pain is not being treated  
23  
24  
25 9. Did you start a new treatment for pain in the last month?  
26 a. Yes  
27 b. No  
28  
29  
30 10. Please select the treatment/s you started in the last month. You may select more  
31 than one option:  
32 a. Physiotherapy  
33 b. Pharmacotherapy  
34 c. Infiltrations  
35 d. Psychological treatment  
36 e. Natural / alternative treatments  
37 f. I have not started a new treatment  
38  
39  
40 11. What is your marital status?  
41 a. Single  
42 b. Married  
43 c. In a relationship  
44 d. Divorced  
45 e. Separated  
46 f. Widowed  
47  
48  
49 12. What is your job status?  
50 a. Active worker  
51 b. Sick leave  
52 c. Permanent disability  
53 d. Unemployed  
54 e. Homemaker  
55 f. Retired  
56 g. Student  
57  
58  
59 13. What is the highest level of education you have completed?  
60

- 1
- 2
- 3 a. No studies
- 4 b. Less than high school
- 5 c. High school graduate
- 6 d. Technical training
- 7 e. University degree
- 8
- 9

10 14. Do you currently have a diagnosis of depression by a physician or a  
11 psychologist?

- 12 a. Yes
- 13 b. No
- 14
- 15

16 15. Do you currently have a diagnosis of anxiety by a physician or a psychologist?

- 17 a. Yes
- 18 b. No
- 19
- 20
- 21

22 *Items assessed twice a day and in the event of acute pain episodes:*

23 16. Please indicate the intensity of your CURRENT PAIN:

24 0 No pain -----10 Extreme pain

25 17. Please indicate the intensity of your CURRENT FATIGUE:

26 0 No fatigue -----10 Extreme fatigue

27 18. Please indicate the intensity of your CURRENT HAPPINESS:

28 0 No happiness -----10 Extremely happy

29 19. Please indicate the intensity of your CURRENT SADNESS:

30 0 No sadness ----- 10 Extremely sad

31 20. Please indicate the intensity of your CURRENT ANXIETY:

32 0 No anxiety ----- 10 Extremely anxious

33 21. Please indicate the intensity of your CURRENT ANGER:

34 0 No anger ----- 10 Extremely angry

35 22. Does your pain have any of these characteristics? You may select more than one  
36 option:

- 37 a. Burning
- 38 b. Painful cold
- 39 c. Electric shocks
- 40 d. Tingling
- 41 e. Pins and needles
- 42 f. Numbness
- 43 g. Itching
- 44 h. Reduced sensitivity to touch
- 45
- 46
- 47
- 48
- 49
- 50
- 51
- 52
- 53
- 54
- 55
- 56
- 57
- 58
- 59
- 60

- i. Pain when brushing against the skin
- j. None of the above

*Items assessed in the morning:*

23. In general, your HEALTH is:
  - 1) Very poor
  - 2) Poor
  - 3) Average
  - 4) Good
  - 5) Very good
24. Did your PAIN interfere with the quality of your SLEEP LAST NIGHT?  
0 No interference ----- 10 Maximum interference
25. Indicate your degree of agreement with the following sentence: With my current pain, I should not do my usual job (it includes housework and work outside the home).
  - 1) Strongly disagree
  - 2) Disagree
  - 3) Neither agree nor disagree
  - 4) Agree
  - 5) Strongly agree
26. Indicate your degree of agreement with the following sentence: Experiencing pain is terrible and I feel that pain is stronger than me.
  - 1) Strongly disagree
  - 2) Disagree
  - 3) Neither agree nor disagree
  - 4) Agree
  - 5) Strongly agree
27. Indicate your degree of agreement with the following sentence: I need some control over pain before I can make serious plans.
  - 1) Strongly disagree
  - 2) Disagree
  - 3) Neither agree nor disagree
  - 4) Agree
  - 5) Strongly agree
28. Indicate your degree of agreement with the following sentence: Physical activity aggravates my pain.
  - 1) Strongly disagree

- 2) Disagree
- 3) Neither agree nor disagree
- 4) Agree
- 5) Strongly agree

29. Indicate your degree of agreement with the following sentence: I am living a rewarding life despite my pain.

- 1) Strongly disagree
- 2) Disagree
- 3) Neither agree nor disagree
- 4) Agree
- 5) Strongly agree

*Items assessed in the evening:*

30. Did your PAIN interfere with your ability to perform your USUAL WORK or HOUSEWORK TODAY?

0 No interference ----- 10 Maximum interference

31. Did your PAIN interfere with your LEISURE ACTIVITIES TODAY?

0 No interference ----- 10 Maximum interference

32. Did your PAIN interfere with your SOCIAL INTERACTIONS TODAY?

0 No interference ----- 10 Maximum interference

33. Which STRATEGY did you use to COPE WITH YOUR PAIN TODAY? You may select more than one option:

- a. Inactivity / rest
- b. Relaxation exercise
- c. Speak with someone
- d. Physical Activity / Stretching
- e. Self-statements to persist in a task
- f. Do something to feel positive emotions
- g. Ignore the pain/distract
- h. Pray for the pain to disappear

34. Indicate your degree of agreement with the following sentence: I fear that the pain will get worse.

- 1) Strongly disagree
- 2) Disagree
- 3) Neither agree nor disagree
- 4) Agree
- 5) Strongly agree

- 1  
2  
3 35. Indicate your degree of agreement with the following sentence: Today I could  
4 not keep my pain out of my mind.  
5  
6 1) Strongly disagree  
7 2) Disagree  
8 3) Neither agree nor disagree  
9 4) Agree  
10 5) Strongly agree  
11  
12  
13  
14 36. Please rate your degree of activity TODAY:  
15 0%= Completely inactive -100%= Completely active.  
16  
17  
18 37. In which area have you been more active today? You may select more than one  
19 option:  
20 a. Work  
21 b. Family  
22 c. Couple  
23 d. Friends  
24 e. Leisure  
25 f. Physical activity  
26 g. Other.  
27  
28  
29  
30  
31 38. Did you take a rescue medication TODAY (i.e., medication you only use in the  
32 event of acute pain)?  
33 a. Yes  
34 b. No  
35  
36  
37  
38 39. Did you experience any of these symptoms TODAY? You may select more than  
39 one option:  
40 a. Nausea  
41 b. Vomiting  
42 c. Tachycardia  
43 d. Constipation  
44 e. Drowsiness / sedation  
45 f. Blurred vision  
46 g. Dry mouth  
47 h. Headache  
48 i. None of the above  
49  
50  
51  
52  
53 40. Did you experience any of these symptoms TODAY? You may select more than  
54 one option:  
55 a. Dizziness  
56 b. Itching  
57 c. Diarrhea  
58 d. Gait instability  
59  
60

- e. Excessive sweating
- f. Fever
- g. Urine retention
- h. Facial redness
- i. A different symptom
- j. None of the above

41. Did you take your prescribed medication TODAY?

- a. Yes
- b. No, but I will do it later
- c. No and I do not plan to take it
- d. I haven't been prescribed a pain medication

42. How many times did you take a rescue medication TODAY?

- a. 0
- b. 1
- c. 2
- d. 3
- e. 4
- f. 5
- g. 6
- h. 7
- i. 8
- j. 9
- k. 10
- l. More than 10

*Items assessed the last day of app use:*

43. With respect to the beginning of treatment, how are you feeling NOW?

- 1) Much worse
- 2) Somewhat worse
- 3) The same
- 4) Somewhat better
- 5) Much better

44. Have you experienced any negative life event in the PAST MONTH?

- a. No
- b. Yes, but it did not affect me at all
- c. Yes, but it did not affect me much
- d. Yes and it had quite an effect on me
- e. Yes and it affected me a lot

- 1  
2  
3  
4  
5  
6  
7  
8  
9  
10  
11  
12  
13  
14  
15  
16  
17  
18  
19  
20  
21  
22  
23  
24  
25  
26  
27  
28  
29  
30  
31  
32  
33  
34  
35  
36  
37  
38  
39  
40  
41  
42  
43  
44  
45  
46  
47  
48  
49  
50  
51  
52  
53  
54  
55  
56  
57  
58  
59  
60
45. If you experienced a major negative life event in the last month, please indicate its characteristics using the list below. You may select more than one option:
- Death of a close person
  - Job problem
  - Relationship problem
  - Economic problem
  - Health problem
  - Family problem
  - An event not listed above
  - I have not experienced any major negative event this month
46. Please indicate the location where your pain is more intense:
- Head
  - Shoulder
  - Neck
  - High back
  - Lower back
  - Arm
  - Elbow
  - Wrist
  - Hand
  - Abdomen
  - Chest
  - Buttock
  - Hip
  - Leg
  - Knee
  - Foot
  - Whole body
  - Somewhere not listed
47. What is your current treatment for pain? You may select more than one option:
- Physiotherapy
  - Pharmacotherapy
  - Infiltrations
  - Psychological treatment
  - Natural / alternative treatments
  - My pain is not being treated
48. Did you start a new treatment for pain in the last month?
- Yes
  - No
49. Please select the treatment/s you started in the last month. You may select more than one option:
- Physiotherapy
  - Pharmacotherapy
  - Infiltrations
  - Psychological treatment



- e. Natural / alternative treatments
- f. I have not started a new treatment

50. What is your marital status?

- a. Single
- b. Married
- c. In a relationship
- d. Divorced
- e. Separated
- f. Widowed

51. What is your job status?

- a. Active worker
- b. Sick leave
- c. Permanent disability
- d. Unemployed
- e. Homemaker
- f. Retired
- g. Student

52. Do you currently have a diagnosis of depression by a physician or a psychologist?

- a. Yes
- b. No

53. Do you currently have a diagnosis of anxiety by a physician or a psychologist?

- a. Yes
- b. No

**Supplement 4: Alarms integrated into the Pain Monitor app**

- Morning pain severity > 7 during 5 consecutive days
- Evening pain severity > 7 during 5 consecutive days
- Morning sadness >7 during 5 consecutive days
- Evening sadness >7 during 5 consecutive days
- Morning anxiety >7 during 5 consecutive days
- Evening anxiety >7 during 5 consecutive days
- Vomiting during 2 consecutive days
- Tachycardia during 2 consecutive days
- Blurred vision during 2 consecutive days
- Headache during 2 consecutive days
- Dry mouth during 2 consecutive days
- Constipation during 5 consecutive days
- Drowsiness during 5 consecutive days
- Nausea during 3 consecutive days
- Itching during 3 consecutive days
- Diarrhea during 2 consecutive days
- Fever during 2 consecutive days
- Facial redness during 2 consecutive days
- Urine retention during 2 consecutive days
- Gait instability during 3 consecutive days
- Excessive sweating during 7 consecutive days
- Dizziness during 3 consecutive days
- Treatment discontinuation during 3 consecutive days
- Rescue medication > 3 during 3 consecutive days
- Sleep interference > 7 during 5 consecutive days

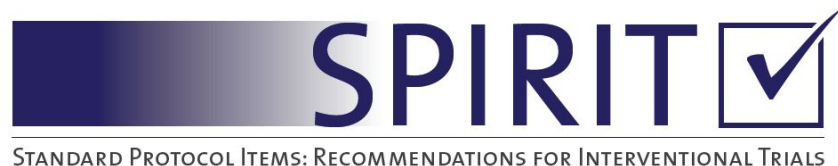

## Additional file 2: SPIRIT Checklist

SPIRIT 2013 Checklist: Recommended items to address in a clinical trial protocol and related documents\*

| Section/item                      | Item No | Description                                                                                                                                                                                                                                                                              | Addressed on page number          |
|-----------------------------------|---------|------------------------------------------------------------------------------------------------------------------------------------------------------------------------------------------------------------------------------------------------------------------------------------------|-----------------------------------|
| <b>Administrative information</b> |         |                                                                                                                                                                                                                                                                                          |                                   |
| Title                             | 1       | Descriptive title identifying the study design, population, interventions, and, if applicable, trial acronym                                                                                                                                                                             | Title, page 1                     |
| Trial registration                | 2a      | Trial identifier and registry name. If not yet registered, name of intended registry                                                                                                                                                                                                     | Abstract, page 1                  |
|                                   | 2b      | All items from the World Health Organization Trial Registration Data Set                                                                                                                                                                                                                 | Additional file 1                 |
| Protocol version                  | 3       | Date and version identifier                                                                                                                                                                                                                                                              | Protocol Amendment Number, page 1 |
| Funding                           | 4       | Sources and types of financial, material, and other support                                                                                                                                                                                                                              | Declarations, page 14             |
| Roles and responsibilities        | 5a      | Names, affiliations, and roles of protocol contributors                                                                                                                                                                                                                                  | Authors, page 1                   |
|                                   | 5b      | Name and contact information for the trial sponsor                                                                                                                                                                                                                                       | Trial sponsor, page 1             |
|                                   | 5c      | Role of study sponsor and funders, if any, in study design; collection, management, analysis, and interpretation of data; writing of the report; and the decision to submit the report for publication, including whether they will have ultimate authority over any of these activities | Declarations, page 14             |

|    |                                                           |     |                                                                                                                                                                                                                                                                  |                                              |
|----|-----------------------------------------------------------|-----|------------------------------------------------------------------------------------------------------------------------------------------------------------------------------------------------------------------------------------------------------------------|----------------------------------------------|
| 1  |                                                           | 5d  | Composition, roles, and responsibilities of the coordinating centre, steering committee, endpoint adjudication committee, data management team, and other individuals or groups overseeing the trial, if applicable (see Item 21a for data monitoring committee) | Methods, Page 12                             |
| 2  |                                                           |     |                                                                                                                                                                                                                                                                  |                                              |
| 3  |                                                           |     |                                                                                                                                                                                                                                                                  |                                              |
| 4  |                                                           |     |                                                                                                                                                                                                                                                                  |                                              |
| 5  |                                                           |     |                                                                                                                                                                                                                                                                  |                                              |
| 6  |                                                           |     |                                                                                                                                                                                                                                                                  |                                              |
| 7  | <b>Introduction</b>                                       |     |                                                                                                                                                                                                                                                                  |                                              |
| 8  |                                                           |     |                                                                                                                                                                                                                                                                  |                                              |
| 9  | Background and rationale                                  | 6a  | Description of research question and justification for undertaking the trial, including summary of relevant studies (published and unpublished) examining benefits and harms for each intervention                                                               | Introduction, page 1-3                       |
| 10 |                                                           |     |                                                                                                                                                                                                                                                                  |                                              |
| 11 |                                                           |     |                                                                                                                                                                                                                                                                  |                                              |
| 12 |                                                           | 6b  | Explanation for choice of comparators                                                                                                                                                                                                                            | Method, page 6                               |
| 13 |                                                           |     |                                                                                                                                                                                                                                                                  |                                              |
| 14 | Objectives                                                | 7   | Specific objectives or hypotheses                                                                                                                                                                                                                                | Introduction, page 3                         |
| 15 |                                                           |     |                                                                                                                                                                                                                                                                  |                                              |
| 16 |                                                           |     |                                                                                                                                                                                                                                                                  |                                              |
| 17 | Trial design                                              | 8   | Description of trial design including type of trial (eg, parallel group, crossover, factorial, single group), allocation ratio, and framework (eg, superiority, equivalence, noninferiority, exploratory)                                                        | Introduction, page 5                         |
| 18 |                                                           |     |                                                                                                                                                                                                                                                                  |                                              |
| 19 |                                                           |     |                                                                                                                                                                                                                                                                  |                                              |
| 20 |                                                           |     |                                                                                                                                                                                                                                                                  |                                              |
| 21 |                                                           |     |                                                                                                                                                                                                                                                                  |                                              |
| 22 | <b>Methods: Participants, interventions, and outcomes</b> |     |                                                                                                                                                                                                                                                                  |                                              |
| 23 |                                                           |     |                                                                                                                                                                                                                                                                  |                                              |
| 24 | Study setting                                             | 9   | Description of study settings (eg, community clinic, academic hospital) and list of countries where data will be collected. Reference to where list of study sites can be obtained                                                                               | Sample, page 6                               |
| 25 |                                                           |     |                                                                                                                                                                                                                                                                  |                                              |
| 26 |                                                           |     |                                                                                                                                                                                                                                                                  |                                              |
| 27 | Eligibility criteria                                      | 10  | Inclusion and exclusion criteria for participants. If applicable, eligibility criteria for study centres and individuals who will perform the interventions (eg, surgeons, psychotherapists)                                                                     | Table 1, page 7                              |
| 28 |                                                           |     |                                                                                                                                                                                                                                                                  |                                              |
| 29 |                                                           |     |                                                                                                                                                                                                                                                                  |                                              |
| 30 | Interventions                                             | 11a | Interventions for each group with sufficient detail to allow replication, including how and when they will be administered                                                                                                                                       | Interventions and Assessment plan, page 8-11 |
| 31 |                                                           |     |                                                                                                                                                                                                                                                                  |                                              |
| 32 |                                                           |     |                                                                                                                                                                                                                                                                  |                                              |
| 33 |                                                           |     |                                                                                                                                                                                                                                                                  |                                              |
| 34 |                                                           |     |                                                                                                                                                                                                                                                                  |                                              |
| 35 |                                                           | 11b | Criteria for discontinuing or modifying allocated interventions for a given trial participant (eg, drug dose change in response to harms, participant request, or improving/worsening disease)                                                                   | Sample, page 7-8                             |
| 36 |                                                           |     |                                                                                                                                                                                                                                                                  |                                              |
| 37 |                                                           |     |                                                                                                                                                                                                                                                                  |                                              |
| 38 |                                                           | 11c | Strategies to improve adherence to intervention protocols, and any procedures for monitoring adherence (eg, drug tablet return, laboratory tests)                                                                                                                | Procedure, page 8                            |
| 39 |                                                           |     |                                                                                                                                                                                                                                                                  |                                              |
| 40 |                                                           |     |                                                                                                                                                                                                                                                                  |                                              |
| 41 |                                                           |     |                                                                                                                                                                                                                                                                  |                                              |
| 42 |                                                           |     |                                                                                                                                                                                                                                                                  |                                              |
| 43 |                                                           |     |                                                                                                                                                                                                                                                                  |                                              |
| 44 |                                                           |     |                                                                                                                                                                                                                                                                  |                                              |
| 45 |                                                           |     |                                                                                                                                                                                                                                                                  |                                              |
| 46 |                                                           |     |                                                                                                                                                                                                                                                                  |                                              |

|    |                      |     |                                                                                                                                                                                                                                                                                                                                                                                |                             |
|----|----------------------|-----|--------------------------------------------------------------------------------------------------------------------------------------------------------------------------------------------------------------------------------------------------------------------------------------------------------------------------------------------------------------------------------|-----------------------------|
| 1  |                      | 11d | Relevant concomitant care and interventions that are permitted or prohibited during the trial                                                                                                                                                                                                                                                                                  | Interventions 9-10          |
| 2  | Outcomes             | 12  | Primary, secondary, and other outcomes, including the specific measurement variable (eg, systolic blood pressure), analysis metric (eg, change from baseline, final value, time to event), method of aggregation (eg, median, proportion), and time point for each outcome. Explanation of the clinical relevance of chosen efficacy and harm outcomes is strongly recommended | Assessment plan, page 10-11 |
| 3  |                      |     |                                                                                                                                                                                                                                                                                                                                                                                |                             |
| 4  |                      |     |                                                                                                                                                                                                                                                                                                                                                                                |                             |
| 5  | Participant timeline | 13  | Time schedule of enrolment, interventions (including any run-ins and washouts), assessments, and visits for participants. A schematic diagram is highly recommended (see Figure)                                                                                                                                                                                               | Figure 1                    |
| 6  |                      |     |                                                                                                                                                                                                                                                                                                                                                                                |                             |
| 7  | Sample size          | 14  | Estimated number of participants needed to achieve study objectives and how it was determined, including clinical and statistical assumptions supporting any sample size calculations                                                                                                                                                                                          | Sample, page 6-7            |
| 8  |                      |     |                                                                                                                                                                                                                                                                                                                                                                                |                             |
| 9  | Recruitment          | 15  | Strategies for achieving adequate participant enrolment to reach target sample size                                                                                                                                                                                                                                                                                            | Procedure, Page 8           |
| 10 |                      |     |                                                                                                                                                                                                                                                                                                                                                                                |                             |

**Methods: Assignment of interventions (for controlled trials)**

Allocation:

|    |                                  |     |                                                                                                                                                                                                                                                                                                                                                          |                   |
|----|----------------------------------|-----|----------------------------------------------------------------------------------------------------------------------------------------------------------------------------------------------------------------------------------------------------------------------------------------------------------------------------------------------------------|-------------------|
| 11 | Sequence generation              | 16a | Method of generating the allocation sequence (eg, computer-generated random numbers), and list of any factors for stratification. To reduce predictability of a random sequence, details of any planned restriction (eg, blocking) should be provided in a separate document that is unavailable to those who enrol participants or assign interventions | Sample, page 7    |
| 12 |                                  |     |                                                                                                                                                                                                                                                                                                                                                          |                   |
| 13 |                                  |     |                                                                                                                                                                                                                                                                                                                                                          |                   |
| 14 | Allocation concealment mechanism | 16b | Mechanism of implementing the allocation sequence (eg, central telephone; sequentially numbered, opaque, sealed envelopes), describing any steps to conceal the sequence until interventions are assigned                                                                                                                                                | Sample, page 7    |
| 15 |                                  |     |                                                                                                                                                                                                                                                                                                                                                          |                   |
| 16 | Implementation                   | 16c | Who will generate the allocation sequence, who will enrol participants, and who will assign participants to interventions                                                                                                                                                                                                                                | Procedure, page 8 |
| 17 |                                  |     |                                                                                                                                                                                                                                                                                                                                                          |                   |
| 18 | Blinding (masking)               | 17a | Who will be blinded after assignment to interventions (eg, trial participants, care providers, outcome assessors, data analysts), and how                                                                                                                                                                                                                | Pages 6 and 13    |
| 19 |                                  |     |                                                                                                                                                                                                                                                                                                                                                          |                   |
| 20 |                                  | 17b | If blinded, circumstances under which unblinding is permissible, and procedure for revealing a participant's allocated intervention during the trial                                                                                                                                                                                                     | Pages 6 and 13    |

1 **Methods: Data collection, management, and analysis**

2

3

4 Data collection methods 18a Plans for assessment and collection of outcome, baseline, and other trial data, including any related processes to promote data quality (eg, duplicate measurements, training of assessors) and a description of study instruments (eg, questionnaires, laboratory tests) along with their reliability and validity, if known. Reference to where data collection forms can be found, if not in the protocol Assessment plan, page 10-12

5

6

7

8

9 18b Plans to promote participant retention and complete follow-up, including list of any outcome data to be collected for participants who discontinue or deviate from intervention protocols Procedure, page 9

10

11

12 Data management 19 Plans for data entry, coding, security, and storage, including any related processes to promote data quality (eg, double data entry; range checks for data values). Reference to where details of data management procedures can be found, if not in the protocol Sample, page 7

13

14

15

16

17 Statistical methods 20a Statistical methods for analysing primary and secondary outcomes. Reference to where other details of the statistical analysis plan can be found, if not in the protocol Data analysis, page 12-13

18

19

20 20b Methods for any additional analyses (eg, subgroup and adjusted analyses) Not applicable

21

22 20c Definition of analysis population relating to protocol non-adherence (eg, as randomised analysis), and any statistical methods to handle missing data (eg, multiple imputation) Data analysis, page 12-13

23

24

25

26

27 **Methods: Monitoring**

28

29 Data monitoring 21a Composition of data monitoring committee (DMC); summary of its role and reporting structure; statement of whether it is independent from the sponsor and competing interests; and reference to where further details about its charter can be found, if not in the protocol. Alternatively, an explanation of why a DMC is not needed Methods, Page 12

30

31

32

33

34

35 21b Description of any interim analyses and stopping guidelines, including who will have access to these interim results and make the final decision to terminate the trial Data analysis, page 13

36

37

38 Harms 22 Plans for collecting, assessing, reporting, and managing solicited and spontaneously reported adverse events and other unintended effects of trial interventions or trial conduct Sample, page 8

39

40

41

42

|    |                                 |     |                                                                                                                                                                                                                                                                                     |                                 |
|----|---------------------------------|-----|-------------------------------------------------------------------------------------------------------------------------------------------------------------------------------------------------------------------------------------------------------------------------------------|---------------------------------|
| 1  | Auditing                        | 23  | Frequency and procedures for auditing trial conduct, if any, and whether the process will be independent from investigators and the sponsor                                                                                                                                         | Not applicable                  |
| 2  |                                 |     |                                                                                                                                                                                                                                                                                     |                                 |
| 3  |                                 |     |                                                                                                                                                                                                                                                                                     |                                 |
| 4  | <b>Ethics and dissemination</b> |     |                                                                                                                                                                                                                                                                                     |                                 |
| 5  |                                 |     |                                                                                                                                                                                                                                                                                     |                                 |
| 6  | Research ethics approval        | 24  | Plans for seeking research ethics committee/institutional review board (REC/IRB) approval                                                                                                                                                                                           | Declarations, page 15           |
| 7  |                                 |     |                                                                                                                                                                                                                                                                                     |                                 |
| 8  |                                 |     |                                                                                                                                                                                                                                                                                     |                                 |
| 9  | Protocol amendments             | 25  | Plans for communicating important protocol modifications (eg, changes to eligibility criteria, outcomes, analyses) to relevant parties (eg, investigators, REC/IRBs, trial participants, trial registries, journals, regulators)                                                    | Page 8                          |
| 10 |                                 |     |                                                                                                                                                                                                                                                                                     |                                 |
| 11 |                                 |     |                                                                                                                                                                                                                                                                                     |                                 |
| 12 |                                 |     |                                                                                                                                                                                                                                                                                     |                                 |
| 13 |                                 |     |                                                                                                                                                                                                                                                                                     |                                 |
| 14 | Consent or assent               | 26a | Who will obtain informed consent or assent from potential trial participants or authorised surrogates, and how (see Item 32)                                                                                                                                                        | Sample, page 8                  |
| 15 |                                 |     |                                                                                                                                                                                                                                                                                     |                                 |
| 16 |                                 |     |                                                                                                                                                                                                                                                                                     |                                 |
| 17 |                                 | 26b | Additional consent provisions for collection and use of participant data and biological specimens in ancillary studies, if applicable                                                                                                                                               | Not applicable                  |
| 18 |                                 |     |                                                                                                                                                                                                                                                                                     |                                 |
| 19 |                                 |     |                                                                                                                                                                                                                                                                                     |                                 |
| 20 | Confidentiality                 | 27  | How personal information about potential and enrolled participants will be collected, shared, and maintained in order to protect confidentiality before, during, and after the trial                                                                                                | Sample, page 7-8                |
| 21 |                                 |     |                                                                                                                                                                                                                                                                                     |                                 |
| 22 |                                 |     |                                                                                                                                                                                                                                                                                     |                                 |
| 23 | Declaration of interests        | 28  | Financial and other competing interests for principal investigators for the overall trial and each study site                                                                                                                                                                       | Declarations, page 15           |
| 24 |                                 |     |                                                                                                                                                                                                                                                                                     |                                 |
| 25 |                                 |     |                                                                                                                                                                                                                                                                                     |                                 |
| 26 |                                 |     |                                                                                                                                                                                                                                                                                     |                                 |
| 27 | Access to data                  | 29  | Statement of who will have access to the final trial dataset, and disclosure of contractual agreements that limit such access for investigators                                                                                                                                     | Data analysis, page 13          |
| 28 |                                 |     |                                                                                                                                                                                                                                                                                     |                                 |
| 29 |                                 |     |                                                                                                                                                                                                                                                                                     |                                 |
| 30 | Ancillary and post-trial care   | 30  | Provisions, if any, for ancillary and post-trial care, and for compensation to those who suffer harm from trial participation                                                                                                                                                       | Sample, page 8                  |
| 31 |                                 |     |                                                                                                                                                                                                                                                                                     |                                 |
| 32 |                                 |     |                                                                                                                                                                                                                                                                                     |                                 |
| 33 | Dissemination policy            | 31a | Plans for investigators and sponsor to communicate trial results to participants, healthcare professionals, the public, and other relevant groups (eg, via publication, reporting in results databases, or other data sharing arrangements), including any publication restrictions | Study design, page 6            |
| 34 |                                 |     |                                                                                                                                                                                                                                                                                     |                                 |
| 35 |                                 |     |                                                                                                                                                                                                                                                                                     |                                 |
| 36 |                                 |     |                                                                                                                                                                                                                                                                                     |                                 |
| 37 |                                 |     |                                                                                                                                                                                                                                                                                     |                                 |
| 38 |                                 | 31b | Authorship eligibility guidelines and any intended use of professional writers                                                                                                                                                                                                      | Authors' contributions, page 16 |
| 39 |                                 |     |                                                                                                                                                                                                                                                                                     |                                 |
| 40 |                                 |     |                                                                                                                                                                                                                                                                                     |                                 |
| 41 |                                 |     |                                                                                                                                                                                                                                                                                     |                                 |
| 42 |                                 |     |                                                                                                                                                                                                                                                                                     |                                 |
| 43 |                                 |     |                                                                                                                                                                                                                                                                                     |                                 |
| 44 |                                 |     |                                                                                                                                                                                                                                                                                     |                                 |
| 45 |                                 |     |                                                                                                                                                                                                                                                                                     |                                 |
| 46 |                                 |     |                                                                                                                                                                                                                                                                                     |                                 |

|    |                            |                                                                                                                                                                                                   |                                            |
|----|----------------------------|---------------------------------------------------------------------------------------------------------------------------------------------------------------------------------------------------|--------------------------------------------|
| 1  | 31c                        | Plans, if any, for granting public access to the full protocol, participant-level dataset, and statistical code                                                                                   | Availability of data and material, page 15 |
| 2  |                            |                                                                                                                                                                                                   |                                            |
| 3  |                            |                                                                                                                                                                                                   |                                            |
| 4  |                            |                                                                                                                                                                                                   |                                            |
| 5  |                            |                                                                                                                                                                                                   |                                            |
| 6  | <b>Appendices</b>          |                                                                                                                                                                                                   |                                            |
| 7  |                            |                                                                                                                                                                                                   |                                            |
| 8  | Informed consent materials | 32 Model consent form and other related documentation given to participants and authorised surrogates                                                                                             | Additional file 3                          |
| 9  |                            |                                                                                                                                                                                                   |                                            |
| 10 |                            |                                                                                                                                                                                                   |                                            |
| 11 | Biological specimens       | 33 Plans for collection, laboratory evaluation, and storage of biological specimens for genetic or molecular analysis in the current trial and for future use in ancillary studies, if applicable | Not applicable                             |
| 12 |                            |                                                                                                                                                                                                   |                                            |
| 13 |                            |                                                                                                                                                                                                   |                                            |

\*It is strongly recommended that this checklist be read in conjunction with the SPIRIT 2013 Explanation & Elaboration for important clarification on the items. Amendments to the protocol should be tracked and dated. The SPIRIT checklist is copyrighted by the SPIRIT Group under the Creative Commons "[Attribution-NonCommercial-NoDerivs 3.0 Unported](https://creativecommons.org/licenses/by-nc-nd/3.0/)" license.



# BMJ Open

## Improving chronic pain management with eHealth and mHealth: study protocol for a randomized controlled trial

|                                 |                                                                                                                                                                                                                                                                                                                                                 |
|---------------------------------|-------------------------------------------------------------------------------------------------------------------------------------------------------------------------------------------------------------------------------------------------------------------------------------------------------------------------------------------------|
| Journal:                        | <i>BMJ Open</i>                                                                                                                                                                                                                                                                                                                                 |
| Manuscript ID                   | bmjopen-2019-033586.R1                                                                                                                                                                                                                                                                                                                          |
| Article Type:                   | Protocol                                                                                                                                                                                                                                                                                                                                        |
| Date Submitted by the Author:   | 18-Oct-2019                                                                                                                                                                                                                                                                                                                                     |
| Complete List of Authors:       | Jaén, Irene; Universitat Jaume I, Basic Psychology, Clinical Psychology and Psychobiology<br>Suso-Ribera, Carlos; Universitat Jaume I<br>Castilla, Diana; Universidad de Zaragoza<br>Zaragoza, Irene; Instituto de Salud Carlos III<br>García-Palacios, Azucena; Universitat Jaume I<br>Gómez Palones, Jose Luis; Hospital General de Castellon |
| <b>Primary Subject Heading</b>: | Anaesthesia                                                                                                                                                                                                                                                                                                                                     |
| Secondary Subject Heading:      | Public health                                                                                                                                                                                                                                                                                                                                   |
| Keywords:                       | chronic pain, ecological momentary assessment, ehealth, mhealth, telemonitoring                                                                                                                                                                                                                                                                 |
|                                 |                                                                                                                                                                                                                                                                                                                                                 |

SCHOLARONE™  
Manuscripts

1  
2  
3  
4  
5  
6  
7  
8  
9  
10  
11  
12  
13  
14  
15  
16  
17  
18  
19  
20  
21  
22  
23  
24  
25  
26  
27  
28  
29  
30  
31  
32  
33  
34  
35  
36  
37  
38  
39  
40  
41  
42  
43  
44  
45  
46  
47  
48  
49  
50  
51  
52  
53  
54  
55  
56  
57  
58  
59  
60

1 **Title:** Improving chronic pain management with eHealth and mHealth: study protocol  
2 for a randomized controlled trial

4 **Running Head:** Telemonitoring of pain by Pain Monitor App

6 **Authors:** Irene Jaén<sup>1,a</sup>, Carlos Suso-Ribera<sup>1</sup>, Diana Castilla<sup>2,3</sup>, Irene Zaragoza<sup>3</sup>,  
7 Azucena García-Palacios<sup>1,3</sup> and José Luis Gómez Palonés<sup>4</sup>

9 <sup>1</sup> Universitat Jaume I, Castelló 12007, Spain

10 <sup>2</sup> Universidad de Zaragoza, Teruel 44003, Spain

11 <sup>3</sup> CIBER of Physiopathology of Obesity and Nutrition CIBERObn, CB06/03 Instituto de  
12 Salud Carlos III, Spain

13 <sup>4</sup> Hospital General Universitari de Castelló, 12004, Spain

15 <sup>a</sup> Corresponding author. Universitat Jaume I. Facultad de Ciencias de la Salud.  
16 Departamento de Psicología Básica, Clínica y Psicobiología. Avda. Vicente Sos Baynat  
17 s/n. Castellón de la Plana E-12071 Spain  
18 ijaen@uji.es

20 Trial Sponsor: Universitat Jaume I.: Avda. Vicente Sos Baynat, s/n Castellón de la  
21 Plana E-12071 Spain; **Telephone:** +34 964 38 74 80; e-mail: ocit@uji.es

23 Word count: 3757

24 **Protocol Amendment Number:** 01

|                 |                        |
|-----------------|------------------------|
| 2019-July-8     | Original               |
| 2019-October-13 | 1 <sup>st</sup> review |

1  
2  
3 **27 Abstract**  
4

5 *28 Introduction:* Chronic pain has become a matter of public health concern due to its high  
6  
7 *29 prevalence and because public costs associated with treatment and disability increase*  
8  
9 *30 each year. Research suggests that limitations in the traditional assessment of chronic*  
10  
11 *31 pain patients limit the effectiveness of current medical treatments. The use of*  
12  
13 *32 technology might serve change patient traditional monitoring into Ecological*  
14  
15 *33 Momentary Assessments, which might be visualized by physicians live. This study*  
16  
17 *34 describes a Randomized Control Trial designed to test the utility of a technology-based*  
18  
19 *35 solution for pain telemonitoring consisting of a smartphone app for patients and a web*  
20  
21 *36 application for physicians. The goal of this study will be to explore whether this*  
22  
23 *37 combination of eHealth and mHealth improves the effectiveness of existing pain*  
24  
25 *38 treatments.*

26  
27  
28 *39 Methods and analysis:* Participants will be 250 patients randomly assigned to one of  
29  
30 *40 these two conditions: treatment as usual (TAU) and TAU+app+web. All participants will*  
31  
32 *41 receive the usual treatment for their pain. Only the TAU+app+web group use Pain*  
33  
34 *42 Monitor app, which generates alarms that are sent to the physicians in the face of*  
35  
36 *43 previously-established undesired events. Physicians will be able to monitor app reports*  
37  
38 *44 using a web application, which might result in an adjustment of treatment. We*  
39  
40 *45 anticipate that the use of Pain Monitor plus the therapist web will result in a reduction of*  
41  
42 *46 pain intensity and side effects of the medication. Improvements on secondary*  
43  
44 *47 outcomes, namely fatigue, mood, pain interference, rescue medication use, and quality*  
45  
46 *48 of life, are also expected. Mixed repeated-measure MANOVAs will be conducted to*  
47  
48 *49 investigate whether there are differences between pre- and post-assessment scores as*  
49  
50 *50 a function of the experimental condition.*

51  
52 *51 Ethics and dissemination:* Ethical approval from the Hospital General Universitari de  
53  
54 *52 Castellon was obtained. The findings will be published in peer-reviewed journals.*

55  
56 *53 Trial registration:* NCT03606265. The trial is active. Recruitment is ongoing.  
57  
58  
59  
60

1  
2  
3 55 **Keywords:** Chronic pain, ecological momentary assessment, ehealth, mhealth,  
4  
5 56 telemonitoring.  
6

7 57

8  
9 58 **Strengths and limitations of this study**

- 10  
11 59 – To the best of our knowledge, this is the first randomized, controlled clinical trial  
12  
13 60 to test the effectiveness of implementing an integrative e-health and m-health  
14  
15 61 solution for chronic pain that provides support to patients and physicians.  
16  
17 62 – Contrary to traditional face-to-face monitoring, patient monitoring in this study  
18  
19 63 becomes ecological and momentary, so that patients can report their evolution  
20  
21 64 at home whenever they want.  
22  
23 65 – Patient responses to the App are used to generate alarms in the presence of  
24  
25 66 unwanted clinical events, such as the onset of side treatment effects or a poor  
26  
27 67 response to treatment.  
28  
29 68 – Physicians can track patient evolution at any time on a website and receive  
30  
31 69 clinical alarms daily, so that rapid responses can be offered.  
32  
33 70 – Study limitations include the fact that physicians who participate in the  
34  
35 71 investigation are not blinded to the participants' assigned condition, since they  
36  
37 72 need to respond to alarms generated by the app, and the fact that the  
38  
39 73 assessment protocol in the App includes more variables than those actually  
40  
41 74 used for the study because the protocol in the App could not be flexibly  
42  
43 75 changed when the study began.  
44  
45  
46  
47  
48

49 76  
50 77 **Introduction**

51 78 Pain can be defined as “an unpleasant sensory and emotional experience associated  
52  
53 79 with actual or potential tissue damage, or described in terms of such damage” (1) and  
54  
55 80 can only be understood as an interplay between “sensory, emotional, cognitive, and  
56  
57 81 social components” (2). Although pain often is acute and disappears as tissues heal,  
58  
59 82 sometimes pain persists for long periods of time and becomes chronic. For instance, it  
60

1  
2  
3 83 has been reported that 15% of individuals admitted to trauma hospitals due to a severe  
4  
5 84 injury and 15- 60% of patients after surgery will continue to experience chronic pain  
6  
7 85 months and years later (3). In general, a cut-off of 3 to 6 months is used to define the  
8  
9 86 transition from acute/subacute to chronic pain (4).

10  
11 87 The aforementioned chronification of pain is becoming a major public health problem  
12  
13 88 across the globe (5). We refer here to primary chronic pain, a pain associated with  
14  
15 89 important interference on functioning and/or emotional distress which cannot be better  
16  
17 90 accounted for by any other condition (6). Specifically, epidemiological studies indicate  
18  
19 91 that the prevalence of this disease in the adult population ranges from 19% to 38%  
20  
21 92 worldwide (7–10). Furthermore, the increase in life expectancy and the ageing of the  
22  
23 93 population is likely to have an important impact on the number of individuals  
24  
25 94 experiencing chronic pain, since the prevalence of this syndrome boosts dramatically  
26  
27 95 with age (11). For instance, it is expected that the population of chronic pain individuals  
28  
29 96 will be doubled in 2050 for people older than 65 years and tripled for people over 80  
30  
31 97 years of age (12). Thus, chronic pain is a major public health challenge due to its high  
32  
33 98 prevalence in the population and high direct and indirect costs for the institutions and  
34  
35 99 the individuals (13,14).

36  
37  
38  
39 100 Indeed, chronic primary pain (e.g., fibromyalgia or nonspecific low back or neck pain, to  
40  
41 101 name some examples) is imposing a huge burden in our societies as this disease has  
42  
43 102 become one of the leading causes of years lived with disability globally (15,16) Not  
44  
45 103 surprisingly, as a result of the growing concern about this disease, there have been  
46  
47 104 numerous attempts to improve treatments for pain in the past decades. However,  
48  
49 105 recent reviews on the effectiveness of numerous interventions, including medical  
50  
51 106 treatments, psychological therapy, physical rehabilitation, or a combination of these  
52  
53 107 indicate that the effectiveness of existing treatments is, on average, only modest (17–  
54  
55 108 19). While there might be numerous factors explaining the limited effectiveness of  
56  
57 109 current interventions for pain, including unexplored biomechanical mechanisms or  
58  
59 110 genetic factors, patient characteristics, or therapists' training, some authors have

1  
2  
3 111 pointed to methodological shortcomings as key elements explaining the modest  
4  
5 112 effectiveness of pain interventions. Specifically, the way assessment is currently  
6  
7 113 performed (i.e., a single measure of pain intensity performed episodically during onsite  
8  
9 114 appointments) has been argued to impact negatively in the ability of existing  
10  
11 115 interventions to achieve more reliable and powerful changes in patient outcomes  
12  
13 116 (20,21). For instance, a single rate of pain intensity has been shown to be an unreliable  
14  
15 117 measure of pain as this experience can vary dramatically within the same day and  
16  
17 118 across days (22–24). In addition, pain is frequently assessed retrospectively, which is  
18  
19 119 known to lead to recall bias and to decrease the accuracy of pain ratings (25) and does  
20  
21 120 not allow for timely responses to undesired events, so these often take place time after  
22  
23 121 the problem occurred (21).  
24  
25  
26 122 As a consequence of the above, Ecological Momentary Assessment (EMA), which  
27  
28 123 refers to the assessment of pain repeatedly and in real life, has received renewed  
29  
30 124 interest in the past years in the pain literature and is now considered by many as the  
31  
32 125 gold standard method to assess the pain experience (26–29). Traditionally, EMA has  
33  
34 126 been difficult due to the limitations and costs of repeated measurement procedures  
35  
36 127 (i.e., paper diaries or phone calls). However, with the explosion and availability of  
37  
38 128 smartphones, EMA has become easier than ever and immediate communication  
39  
40 129 between the patient and the physician is now a more feasible practice (30).  
41  
42  
43 130 It has been argued that this change in the assessment paradigm towards ecological  
44  
45 131 daily telemonitoring using apps will improve treatment effectiveness and reduce costs if  
46  
47 132 used to respond to patient reports quickly (21,31). Indeed, there is evidence to suggest  
48  
49 133 that smartphones are useful tools to be used for the assessment of pain core outcome  
50  
51 134 measures in chronic pain settings (21,32,33). However, the extent to which this EMA of  
52  
53 135 pain patients can effectively lead to better practices in pain medicine is still unknown.  
54  
55 136 For this purpose, we developed a technology-based solution that integrated a pain and  
56  
57 137 symptom tracking app for patients and a web for physicians where app-generated  
58  
59 138 alarms are received daily and patient app responses can be monitored in real time. To  
60

1  
2  
3 139 the best of our knowledge, no study has yet investigated the utility of using such an  
4  
5 140 integrative technology-based solution for remote, ecological monitoring of patient  
6  
7 141 evolution and to adjust treatment in response to app alarms in a randomized controlled  
8  
9 142 trial.

10  
11 143 With the previous goal in mind, in the present parallel group, superiority trial we will use  
12  
13 144 the *Pain Monitor* app  
14  
15 145 (<https://play.google.com/store/apps/details?id=painmonitor.srccode>), which was  
16  
17 146 developed by a team of psychologists and an engineer with the collaboration of  
18  
19 147 physicians and nurses and has been recently validated in clinical settings (21), together  
20  
21 148 with a web for the physicians where app responses and alarms can be tracked in real  
22  
23 149 time to facilitate the professional's decision-making process. As we will explain in more  
24  
25 150 detail in the Methods section, Pain Monitor assesses a number of pain-related  
26  
27 151 outcomes (i.e., pain intensity, pain interference, anxiety and depression and use of  
28  
29 152 pain-related health resources) and the most frequent side effects of medical treatments  
30  
31 153 for pain. In the study, patients will be randomly assigned to a treatment as usual  
32  
33 154 condition (TAU) or to a TAU with the support of the patients' app and the physician's  
34  
35 155 web. We anticipate that the use of the web application linked with the smartphone app  
36  
37 156 (TAU+app+web condition) will improve the effectiveness of usual treatments resulting  
38  
39 157 in reduced pain intensity and less frequent side effects of the medication after one  
40  
41 158 month of medical treatment. Additionally, we expect that this group of patients will  
42  
43 159 present additional improvements on secondary outcomes, including mood (depression  
44  
45 160 and anxiety), pain interference, pain catastrophizing, and use of pain-related health  
46  
47 161 resources in the past month as secondary gains of reducing pain levels, as suggested  
48  
49 162 in the literature (34). We also expect that the rapid detection of treatment undesired  
50  
51 163 events will rapidly minimize threats to the patient's quality of life and mood.  
52  
53  
54  
55

56 164

## 57 165 **Method**

### 58 166 *Study design*

1  
2  
3 167 The current investigation is a randomized superiority clinical trial composed of two  
4  
5 168 parallel groups (1:1 allocation ratio): a) TAU and b) TAU+app+web. In the study,  
6  
7 169 participants in the TAU condition receive the usual pain treatment by the physicians  
8  
9 170 working at the pain unit (i.e., pharmacological treatment or infiltration). Participants  
10  
11 171 included in TAU+app+web group receive the usual treatment for their pain plus daily  
12  
13 172 monitoring of their symptoms and pain experience with the Pain Monitor app during  
14  
15 173 one month. In the TAU+app+web condition, alarms are generated in the presence of  
16  
17 174 previously established undesired events, which have been previously determined by  
18  
19 175 the physicians at the pain clinic (e.g., pain intensity is higher than 7 in an 11-point  
20  
21 176 numerical scale during 3 consecutive days). Physicians are able to monitor these  
22  
23 177 patients' app reports using a web application created for this purpose  
24  
25 178 (<https://monitordolor.dolortic.com/>). Thus, phone calls can be conducted in the  
26  
27 179 presence of alarms in order to change or discontinue the medical treatment when  
28  
29 180 necessary. If the study results indicate that the use of technology leads to better  
30  
31 181 outcomes, participants in the TAU condition will be informed about these findings and  
32  
33 182 will be offered the possibility to use the app after study participation. In the TAU  
34  
35 183 condition only, assessment is performed as usual, that is, using self-report measures  
36  
37 184 administered onsite at the beginning and the end of the study (1 month later).  
38  
39 185 Neither the physicians nor the patients will be blind to the treatment condition assigned.  
40  
41 186 Physicians will not be blind because they will receive alarms from the TAU+app+web  
42  
43 187 participants only. Patients will not be blind because only those in the TAU+app+web  
44  
45 188 condition will be using technology in addition to usual treatment and because patients  
46  
47 189 in the TAU condition must know that there is no telemonitoring in their condition.  
48  
49 190 The trial was registered at clinicaltrials.gov in September 2018 (NCT03606265). All  
50  
51 191 items from the World Health Organization Trial Registration Data Set are showed in the  
52  
53 192 Supplementary file 1. The recruitment started at the end of the same month. SPIRIT  
54  
55 193 guidelines (Standard Protocol Items: Recommendations for Interventional Trials) were  
56  
57 194 followed to design the trial. The participant timeline (i.e., schedule of enrolment,  
58  
59  
60



195 interventions, and assessments) is shown in Figure 1. Recruitment is currently ongoing  
 196 and is expected to end in November 2019.

197

### 198 *Sample*

199 Participants will be 250 consecutive chronic pain patients attending the pain clinic at  
 200 the Hospital General Universitari de Castello (Spain) for the first time. Required sample  
 201 size was calculated using G\*Power (35). Although the a priori calculation resulted in  
 202 198 participants, the sample size was increased to 250 considering a dropout rate of  
 203 27-30% based on previous studies (36,37). Thus, 125 participants were assigned to  
 204 each condition. Randomization of participants was performed by an independent  
 205 researcher using a computer-generated sequence with *Randomizer* (38). Inclusion  
 206 criteria are shown in Table 1. Only patients for whom a change in the treatment is  
 207 planned (e.g., an epidural infiltration or a change in the prescribed medication) will be  
 208 included in the study (this includes both new and consecutive patients). The reason for  
 209 doing this is that the utility of the technology is expected to be maximized during the  
 210 onset of new treatments, as opposed to those cases in which the treatment plan is  
 211 already well-established.

212

213 Table 1. Inclusion criteria

---

The patient is over 18 years of age

The patient has a mobile phone with Android operating system (the app is currently only available for Android, which is the operating system used by more than 80% of users in Spain) (39).

The patient has the physical ability to use the application

A new treatment plan is started during the first week after study onset

The patient does not present psychological and/or cognitive alterations or problems with language that make his/her participation difficult

---

---

The patient voluntarily wants to participate and signs the informed consent form

---

214

215 In the study, all participants are identified using an alphanumeric code. In the case of  
216 participants in the TAU+app+web condition, this code is automatically generated by the  
217 app. Thus, the database generated by the app is anonymized and the app only collects  
218 the international mobile equipment identity (IMEI). The association between app codes  
219 and patient identifiable characteristics is stored locally at the pain clinic. All data  
220 storage procedures follow the European law and data protection rules (European  
221 Union General Data Protection Regulation 2016/679 of the European Parliament and of  
222 the Council of 27 April 2016). In addition, ethical approval from the Hospital General  
223 Universitari de Castello was obtained, in accordance with the Declaration of Helsinki.  
224 Important protocol modifications will be notified and require the approval of the Ethics  
225 Committee of the Hospital General Universitari de Castello. Approved changes will be  
226 made public at [clinicaltrials.gov](http://clinicaltrials.gov). All the participants read and sign an informed consent  
227 form before randomization (see Supplementary file 2). Patients who do not agree with  
228 the assigned condition, are given the opportunity to be allocated to the preferred  
229 condition, but are not used in the analyses. Any changes to modify the assigned  
230 condition are accepted at any time during the study, again resulting in an exclusion  
231 from the study. Changes in the medication or improvement of disease do not result in  
232 study discontinuation. Disease worsening is not expected to be associated with the  
233 inclusion of the app but, if existent, will result in the discontinuation of app use.

234

### 235 *Procedure*

236 The study is conducted at the pain clinic of the Hospital General Universitari de  
237 Castelló. The study is advertised by physicians to all consecutive patients attending the  
238 pain clinic for the first time. To ensure enrolment, physicians will emphasize the  
239 importance of active patient participation in research in general and in self-monitoring

1  
2  
3 240 in particular. Patients interested in participating are directed to another office where the  
4  
5 241 lead author, I.J., explains the study procedures in more detail and ensures their  
6  
7 242 eligibility. I.J. is in charge of increasing adherence to the treatment (i.e., app) by  
8  
9 243 explaining the utility of the study and by contacting patients when an alarm informing of  
10  
11 244 low app adherence (i.e., more than three consecutive days without response) is  
12  
13 245 received. All participants are provided with an information sheet and sign the informed  
14  
15 246 consent. After participation acceptance, participants are assigned to one of the  
16  
17 247 experimental conditions (TAU or TAU+app+web), which had been previously  
18  
19 248 randomized by an external researcher. All participants then complete a paper-and-  
20  
21 249 pencil assessment protocol in order to control for differences between the two  
22  
23 250 assessment formats (app vs. pen and pencil) and to compare both conditions using the  
24  
25 251 same assessment approach. In addition to this paper-and-pencil evaluation, patients in  
26  
27 252 the TAU+app+web condition download and install the Pain Monitor app into their  
28  
29 253 phones. Once they install the app, they answer to an initial assessment and then  
30  
31 254 complete two measures daily (10 am and 7 pm) during one month (study duration).  
32  
33 255 Finally, an end of study appointment is set (one month later) to conduct the post-  
34  
35 256 assessment evaluation. Due to difficulties in transportation or availability, the post-  
36  
37 257 assessment intervention can either be completed onsite or via an on-line survey.  
38  
39  
40  
41  
42

### 43 259 *Pain monitor*

44  
45 260 The Pain Monitor app (Figure 2) has been developed by a group of pain psychologists  
46  
47 261 and an engineer, with the collaboration of physicians and nurses specialized in pain  
48  
49 262 care. Pain Monitor is composed of several pain-related items which are to be answered  
50  
51 263 twice a day at preset times (10 am and 7 pm, with a two-hour flexibility) during 30 days.  
52  
53 264 The app content has been previously validated with chronic pain patients at the pain  
54  
55 265 unit of the Vall d'Hebron Hospital (21). This assessment protocol contains  
56  
57 266 sociodemographic items (i.e., age, sex, and education level, among others) which are  
58  
59 267 evaluated on the first day of app use only, as well as a number of pain-related  
60

1  
2  
3 268 outcomes that are evaluated daily, which have been selected following recent  
4  
5 269 guidelines on core outcome domains for pain treatments (40,41). Constructs in the app,  
6  
7 270 including pain intensity, pain interference, anxiety, depression, catastrophizing, social  
8  
9 271 support, acceptance, and coping, among others, are measured with a single item to  
10  
11 272 reduce the burden of daily assessment, each of which was adapted and validated  
12  
13 273 against well-established paper-and-pencil measures (21). Additionally, the assessment  
14  
15 274 protocol includes a list of side effects created *ad hoc* based on the literature findings on  
16  
17 275 the most frequent adverse effects of pain treatments (42,43), as well as measures of  
18  
19 276 treatment adherence, use of rescue medication, neuropathic characteristics of pain,  
20  
21 277 and use of medical services in the past month. All app items can be found in  
22  
23  
24 278 Supplementary file 3.

25  
26  
27 279 The app generates alarms in the presence of predefined events (see Supplementary  
28  
29 280 file 4 for the alarms set in the present study in collaboration with the participating  
30  
31 281 physicians). These alarms are sent to the physicians early in the morning on working  
32  
33 282 days so that they can decide whether an action from their side is required (e.g., calling  
34  
35 283 the patient and setting an earlier appointment or suggesting a change in the  
36  
37 284 medication). For this study, a website linked to the app was created for the physicians  
38  
39 285 to observe patient alarms and evolution live. Examples of the physician web are  
40  
41 286 presented in Figure 3. Physicians are only asked to check the website when an alarm  
42  
43 287 happens, but they are allowed to check any patient status at any time.  
44  
45

46 288

#### 47 289 *Interventions*

48  
49  
50 290 Five physicians at the pain clinic of the Hospital General Universitari de Castelló  
51  
52 291 participate in this study. All patients in the study receive the usual treatment for their  
53  
54 292 pain irrespective of their assigned condition. However, a change in treatment might  
55  
56 293 occur in the TAU+app+web condition at the discretion of the physicians in charge of  
57  
58 294 treatment after receiving an alarm and consulting the web page with the graphical  
59  
60

1  
2  
3 295 representation of patient app responses. As usual, patients in the TAU condition  
4  
5 296 without the app are not contacted by the physicians between appointments. It is  
6  
7 297 important to note that both patients in the TAU only and patients in the TAU+app+web  
8  
9 298 condition are allowed to attend to the emergency services or the family physician in the  
10  
11 299 event of an emergency at any stage of the study due to ethical reasons. At the end of  
12  
13 300 the study, this practice is investigated for each participant in the final assessment.  
14  
15  
16 301

### 17 302 *Assessment plan*

18  
19  
20 303 All participants in the study fill in a number of questionnaires in a paper-and-pencil  
21  
22 304 format at the beginning and at the end of the study. This assessment protocol includes  
23  
24 305 sociodemographic information, sickness work absence during the past month, use of  
25  
26 306 pain-related health resources in the past month (i.e., emergency services, family  
27  
28 307 physician, or pain clinic), pain-related physical symptoms experienced in the past week  
29  
30 308 (i.e., side medication effects), the Brief Pain Inventory (pain severity and interference)  
31  
32 309 (44), the Pain Catastrophizing Scale (45), and the Hospital Anxiety and Depression  
33  
34 310 Scale (46). In addition to this paper-and-pencil evaluation, participants in the  
35  
36 311 TAU+app+web condition also install the Pain Monitor app and complete a pre-  
37  
38 312 intervention assessment in the app after the paper-and-pencil evaluation. Both baseline  
39  
40 313 assessments include the same content and are duplicated to provide further evidence  
41  
42 314 for the validity of app content. After this pretreatment evaluation, participants in the  
43  
44 315 TAU+app+web group are asked to answer to the app assessments twice a day during  
45  
46 316 one month (study duration). A push-up system notifies the patient about the need to  
47  
48 317 respond to the app evaluation at 10:00 am and 7:00 pm. These times can be adjusted  
49  
50 318 by the patient with a 2-hour flexibility from the preset times.  
51  
52  
53 319 Daily morning and evening assessments differ in a number of items. Some items are  
54  
55 320 asked twice a day (i.e., pain intensity, sadness, anxiety), while others are only  
56  
57 321 administered in the morning (e.g., interference of pain on sleep) or in the evening (e.g.,  
58  
59  
60

1  
2  
3 322 activity level during the day, interference of pain on daily activities, or physical  
4  
5 323 symptoms experienced during the day).

6  
7 324 Finally, 30 days after the treatment onset (i.e., first evaluation), both groups complete a  
8  
9 325 post-assessment protocol. The measures included in this final evaluation are similar to  
10  
11 326 the ones included in the baseline assessment, with the inclusion of a measure of  
12  
13 327 negative events experienced during the study period and the evaluation of perceived  
14  
15 328 change due to treatment.

16  
17 329 In the study, primary outcomes are pain intensity and the number of side effects of the  
18  
19 330 medication reported in the app, while secondary outcomes include mood (depression  
20  
21 331 and anxiety), pain interference, pain catastrophizing, and use of pain-related health  
22  
23 332 resources in the past month.

24  
25 333 Note that app reports in the TAU+app+web condition are not used to determine  
26  
27 334 treatment effectiveness compared to the TAU only condition because in the latter  
28  
29 335 condition participants do not use the app. Therefore, app responses are only used for  
30  
31 336 telemonitoring and early detection of treatment problems that result in an alarm to the  
32  
33 337 physicians. The comparison of both conditions will be made using the traditional paper-  
34  
35 338 and-pencil evaluations which will be available for both groups. Additionally, the number  
36  
37 339 of alarms and the physician's responses to such alarms (e.g., change in treatment  
38  
39 340 strategies) will be registered. This information will be used to get better insight into the  
40  
41 341 utility of the integrated technology to improve treatment efficacy.  
42  
43  
44

45 342

#### 46 343 *Patient and public Involvement*

47  
48 344 In the current study, patients or the public will not be involved in the design, or conduct,  
49  
50 345 or dissemination of the research.

51 346

#### 52 347 *Data analysis*

53  
54 348 The aim of the present study is to explore the effect of an integrated technology-based  
55  
56 349 solution for chronic pain monitoring (an app that monitors pain patients daily and sends  
57  
58  
59  
60

1  
2  
3 350 clinical alarms to physicians and a web for physicians that graphically represents  
4  
5 351 patient evolution as reported in the app) compared to the usual treatment where  
6  
7 352 monitoring is made using a paper-and-pencil, episodic, onsite evaluation. With this aim  
8  
9 353 in mind, and completer analyses will be performed following the recommendations of  
10  
11 354 the CONSORT guidelines (<http://www.consort-statement.org/>). First, the two conditions  
12  
13 355 will be compared at baseline in the different continuous measures with a between-  
14  
15 356 group analysis via a *t*-test to ensure that randomization indeed resulted in comparable  
16  
17 357 groups prior to intervention. Chi-squared tests will be used for all the categorical  
18  
19 358 variables. To evaluate our hypothesis, mixed repeated-measure MANOVAs will be  
20  
21 359 conducted to investigate whether there are differences between pre- and post-  
22  
23 360 assessment scores as a function of the experimental condition (TAU or  
24  
25 361 TAU+app+web). Distribution normality and homoscedasticity assumptions will be  
26  
27 362 tested by means of Kolmogorov-Smirnov and Levene tests, respectively, and a  
28  
29 363 Mann-Whitney *U* test and Brown-Forsythe *F*-test will be used where necessary. Effect  
30  
31 364 size will be calculated to complement the MANOVA results with the standardized mean  
32  
33 365 difference (Cohen's *d*) for both between and within group analyses. This is a novel  
34  
35 366 study and effect sizes are difficult to anticipate. However, we expect to find larger (i.e.  
36  
37 367 moderate) between-groups effect sizes for primary outcomes (i.e., pain intensity and  
38  
39 368 number of side effects of the medication) when compared to secondary outcomes  
40  
41 369 since medical interventions do not specifically focus on these symptoms (i.e., pain  
42  
43 370 interference, mood, fatigue, rescue medication use, and quality of life). The analysis will  
44  
45 371 be performed by CSR, who will be blinded to the treatment allocation. Only the present  
46  
47 372 study authors will have access to the final trial dataset.  
48  
49 373 Regarding dropouts, we will choose a strict criterion and the analyses will only include  
50  
51 374 participants who complete both the pre and the post assessments. Because of the  
52  
53 375 short duration of the trial (one month per patient) and the minimal risks expected from  
54  
55 376 the use of the app, a data monitoring committee will not be required. Despite the  
56  
57 377 previous, an alarm has been set so that the physicians are warned if a patient fails to

1  
2  
3 378 respond to the App during three consecutive days (i.e., an indirect measure of potential  
4  
5 379 dropouts attributable to the App use). If this happens, the physicians will call the patient  
6  
7 380 and explore the reasons for discontinuation and try to obtain a post-treatment  
8  
9 381 assessment to reduce bias.  
10

11 382

12  
13 383

## 14 384 **Discussion**

15  
16  
17 385 Pain assessment is a complex process characterized by a high variability between and  
18  
19 386 within days, which is usually performed by clinicians using self-report, onsite, single  
20  
21 387 ratings which are based on recall (47,48). EMA using smartphone apps appears to be  
22  
23 388 an innovative and promising alternative to these traditional assessment methods (49)  
24  
25 389 as smartphone apps have demonstrated to be accurate tools to assess pain intensity  
26  
27 390 and related variables from the patients' home, thus facilitating telemonitoring and  
28  
29 391 contributing to the personalization of medical interventions by rapidly adjusting  
30  
31 392 treatments to every individual as a result of telemonitoring (25).  
32  
33

34 393 In the present study protocol, we describe a randomized controlled trial designed to  
35  
36 394 test an integrative technology-based solution for chronic pain monitoring consisting of a  
37  
38 395 web application for the healthcare professional which is linked to the patient's app (i.e.,  
39  
40 396 Pain Monitor). Specifically, we want to explore whether the use of this integrative  
41  
42 397 technology improves the effectiveness of the usual treatment for this population thanks  
43  
44 398 to telemonitoring and the rapid detection of unwanted events. We expect that the use  
45  
46 399 of Pain monitor, with the support of therapist's web, will result in reduced pain intensity  
47  
48 400 and less frequent side effects of the medication after one month of medical treatment  
49  
50 401 due to the professional's rapid reaction in the presence of undesired outcomes. Note  
51  
52 402 that the study goal is not the explore the feasibility of implementing the use of the  
53  
54 403 integrative technology for patient long-term use, but to explore its utility and  
55  
56 404 acceptability when used in the short-term (e.g., during a month) in a critical treatment  
57  
58  
59  
60



1  
2  
3 405 stage (i.e., after the onset of a new treatment plan, when pain is not well controlled and  
4  
5 406 treatment tolerance is unclear).

6  
7 407 To our knowledge, this is the first study to assess the effectiveness of this type of  
8  
9 408 integrative technology solution (i.e., a therapist web site linked to a patient smartphone  
10  
11 409 app) for the telemonitoring of patient symptomatology in chronic pain. If our hypothesis  
12  
13 410 is confirmed, our findings will serve to demonstrate the feasibility and utility of  
14  
15 411 smartphones and specialized webs for therapists so that they can be implemented in  
16  
17 412 specialized care contexts (i.e., pain clinics). Likewise, our results will provide important  
18  
19 413 information about the potential benefits of smartphone apps for the personalization of  
20  
21 414 pain treatments (i.e., treatment can be rapidly personalized to a given patient as a  
22  
23 415 function of individual responses reported in the app). Ultimately, this might help change  
24  
25 416 the model of care for this chronic disease (i.e., episodic, onsite assessment and  
26  
27 417 treatment), since the use of this integrative technology system allows for a continuous  
28  
29 418 and remote evaluation and intervention, providing a faster response to the patient  
30  
31 419 needs and improving self-management and empowerment of patients who attend pain  
32  
33 420 clinics as they become important agents of treatment effectiveness by being in charge  
34  
35 421 of daily reporting of pain-related experiences in the app. In sum, the results of the  
36  
37 422 present investigation could serve an important first step towards the implementation of  
38  
39 423 apps and other Information and Communication Technologies in health services.  
40  
41  
42  
43  
44

#### 425 **List of Abbreviations**

426 TAU = Treatment as usual; EMA = Ecological Momentary Assessment; IMEI =  
427 International Mobile Equipment Identity; SPIRIT = Standard Protocol Items  
428 Recommendations for Interventional Trials; CONSORT = Consolidated Standards of  
429 Reporting Trials; MANOVA = Multivariate Analysis of Variance.

#### 430 431 432 **References**

- 1  
2  
3 433 1. Merskey H, editor. Classification of chronic pain: Descriptions of chronic pain  
4  
5 434 syndromes and definitions of pain terms. *Pain*. 1986;Suppl 3:226.  
6  
7
- 8 435 2. Williams AC de C, Craig KD. Updating the definition of pain. *Pain*.  
9  
10 436 2016;157(11):2420–3.  
11  
12
- 13 437 3. Lavand'homme P. The progression from acute to chronic pain. *Curr Opin*  
14  
15 438 *Anaesthesiol*. 2011;24(5):545–50.  
16  
17
- 18 439 4. Treede R, Rief W, Barke A, Aziz Q, Bennett MI, Benoliel R, et al. A classification  
19  
20 440 of chronic pain for ICD-11. *Pain*. 2015;156(6):1003–7.  
21  
22
- 23 441 5. Bevan S, Quadrello T, Mcgee R, Mahdon M, Vavrovsky A, Barham L. Fit for  
24  
25 442 Work pain-European report. 2009.  
26  
27
- 28 443 6. Barke A, Schiller J, Rief W, Treede R-D, Falter S, Schäfer P, et al. The IASP  
29  
30 444 classification of chronic pain for ICD-11. *Pain*. 2018;160(1):88–94.  
31  
32
- 33 445 7. Breivik H, Collett B, Ventafridda V, Cohen R, Gallacher D. Survey of chronic pain  
34  
35 446 in Europe: prevalence, impact on daily life, and treatment. *Eur J Pain*. 2006  
36  
37 447 May;10(4):287–333.  
38  
39
- 40 448 8. Larsson C, Hansson EE, Sundquist K, Jakobsson U. Chronic pain in older  
41  
42 449 adults: prevalence, incidence, and risk factors. *Scand J Rheumatol*. 2017  
43  
44 450 Jul;46(4):317–25.  
45  
46
- 47 451 9. Nahin RL. Estimates of pain prevalence and severity in adults: United States,  
48  
49 452 2012. *J Pain*. 2015 Aug;16(8):769–80.  
50  
51
- 52 453 10. Häuser W, Wolfe F, Henningsen P, Schmutzer G, Brähler E, Hinz A. Untying  
53  
54 454 chronic pain: Prevalence and societal burden of chronic pain stages in the  
55  
56 455 general population - A cross-sectional survey. *BMC Public Health*. 2014;14(1):1–  
57  
58  
59  
60

- 1  
2  
3 456 8.  
4  
5  
6 457 11. Miró J, Paredes S, Rull M, Queral R, Miralles R, Nieto R, et al. Pain in older  
7  
8 458 adults: A prevalence study in the Mediterranean region of Catalonia. *Eur J Pain*.  
9  
10 459 2007;11(1):83.  
11  
12  
13 460 12. Vincent GE, Velkoff VA. The next four decades the older population in the United  
14  
15 461 States : 2010 to 2050. Vol. 2011, U.S. Department of Commerce. Economics  
16  
17 462 and Statistics Administration. U.S. Census Bureau. 2010.  
18  
19  
20  
21 463 13. Breivik H, Eisenberg E, O'Brien T. The individual and societal burden of chronic  
22  
23 464 pain in Europe: The case for strategic prioritisation and action to improve  
24  
25 465 knowledge and availability of appropriate care. *BMC Public Health*. 2013;13(1).  
26  
27  
28 466 14. Frießem CH, Willweber-Strumpf A, Zenz MW. Chronic pain in primary care.  
29  
30 467 German figures from 1991 and 2006. *BMC Public Health*. 2009;9(1):299.  
31  
32  
33 468 15. Vos T, Barber RM, Bell B, Bertozzi-Villa A, Biryukov S, Bolliger I, et al. Global,  
34  
35 469 regional, and national incidence, prevalence, and years lived with disability for  
36  
37 470 301 acute and chronic diseases and injuries in 188 countries, 1990–2013: a  
38  
39 471 systematic analysis for the Global Burden of Disease Study 2013. *Lancet*. 2015  
40  
41 472 Aug;386(9995):743–800.  
42  
43  
44  
45 473 16. Blyth FM, Van Der Windt DA, Croft PR. Chronic Disabling Pain. *Am J Prev Med*.  
46  
47 474 2015 Jul;49(1):98–101.  
48  
49  
50 475 17. Gatchel RJ, McGeary DD, McGeary CA, Lippe B. Interdisciplinary chronic pain  
51  
52 476 management: past, present, and future. *Am Psychol*. 2014;69(2):119–30.  
53  
54  
55 477 18. Geneen LJ, Moore RA, Clarke C, Martin D, Colvin LA, Smith BH. Physical  
56  
57 478 activity and exercise for chronic pain in adults: an overview of Cochrane  
58  
59 479 Reviews. *Cochrane database Syst Rev*. 2017 Jan;1:CD011279.  
60

- 1  
2  
3 480 19. Hughes LS, Clark J, Colclough JA, Dale E, McMillan D. Acceptance and  
4  
5 481 Commitment Therapy (ACT) for Chronic Pain: A Systematic Review and Meta-  
6  
7 482 Analyses. *Clin J Pain*. 2017 Jun;33(6):552–68.  
8  
9  
10 483 20. Dansie EJ, Turk DC. Assessment of patients with chronic pain. *Br J Anaesth*.  
11  
12 484 2013 Jul;111(1):19–25.  
13  
14  
15 485 21. Suso-Ribera C, Castilla D, Zaragoza I, Ribera-Canudas MV, Botella C, Garcia-  
16  
17 486 Palacios A. Validity, Reliability, Feasibility, and Usefulness of Pain Monitor: A  
18  
19 487 Multidimensional Smartphone App for Daily Monitoring of Adults With  
20  
21 488 Heterogenous Chronic Pain. *Clin J Pain*. 2018 Oct;34(10):900–8.  
22  
23  
24  
25 489 22. Jensen MP, McFarland CA. Increasing the reliability and validity of pain intensity  
26  
27 490 measurement in chronic pain patients. *Pain*. 1993 Nov;55(2):195–203.  
28  
29  
30 491 23. Kikuchi H, Yoshiuchi K, Miyasaka N, Ohashi K, Yamamoto Y, Kumano H, et al.  
31  
32 492 Reliability of recalled self-report on headache intensity: investigation using  
33  
34 493 ecological momentary assessment technique. *Cephalalgia*. 2006  
35  
36 494 Nov;26(11):1335–43.  
37  
38  
39 495 24. Kratz AL, Murphy SL, Braley TJ. Ecological Momentary Assessment of Pain,  
40  
41 496 Fatigue, Depressive, and Cognitive Symptoms Reveals Significant Daily  
42  
43 497 Variability in Multiple Sclerosis. *Arch Phys Med Rehabil*. 2017 Nov;98(11):2142–  
44  
45 498 50.  
46  
47  
48  
49 499 25. García-Palacios A, Herrero R, Belmonte MA, Castilla D, Guixeres J, Molinari G,  
50  
51 500 et al. Ecological momentary assessment for chronic pain in fibromyalgia using a  
52  
53 501 smartphone: A randomized crossover study. *Eur J Pain*. 2014;18(6):862–72.  
54  
55  
56 502 26. Smyth JM, Stone AA. Ecological Momentary Assessment Research in  
57  
58 503 Behavioral medicine. *J Happiness Stud*. 2003 Mar;4(1):35–52.  
59  
60

- 1  
2  
3 504 27. Shiffman S, Stone AA, Hufford MR. Ecological Momentary Assessment. *Annu*  
4  
5 505 *Rev Clin Psychol.* 2008;4(1):1–32.  
6  
7  
8 506 28. Lin W-C, Burke L, Schlenk EA, Yeh CH. Use of an Ecological Momentary  
9  
10 507 Assessment Application to Assess the Effects of Auricular Point Acupressure for  
11  
12 508 Chronic Low Back Pain. *Comput Inform Nurs.* 2018 Oct; 37(5), 276-82.  
13  
14  
15 509 29. Suso-Ribera C, Mesas Á, Medel J, Server A, Márquez E, Castilla D, et al.  
16  
17 510 Improving pain treatment with a smartphone app: study protocol for a  
18  
19 511 randomized controlled trial. *Trials.* 2018 Dec;19(1):145.  
20  
21  
22  
23 512 30. May M, Junghaenel DU, Ono M, Stone AA, Schneider S. Ecological Momentary  
24  
25 513 Assessment Methodology in Chronic Pain Research: A Systematic Review. *J*  
26  
27 514 *Pain.* 2018;19(7):699–716.  
28  
29  
30 515 31. Moore J. The benefits of mobile apps for patients and providers. *Br J Healthc*  
31  
32 516 *Manag.* 2012 Sep 1;18(9):465–7.  
33  
34  
35 517 32. Reynoldson C, Stones C, Allsop M, Gardner P, Bennett MI, Closs SJ, et al.  
36  
37 518 Assessing the Quality and Usability of Smartphone Apps for Pain Self-  
38  
39 519 Management. *Pain Med.* 2014;15(6):898–909.  
40  
41  
42  
43 520 33. Rosser BA, Eccleston C. Smartphone applications for pain management. *J*  
44  
45 521 *Telemed Telecare.* 2011;17(6):308–12.  
46  
47  
48 522 34. Nieto R, Raichle K a, Jensen MP, Miró J. Changes in pain-related beliefs,  
49  
50 523 coping, and catastrophizing predict changes in pain intensity, pain interference,  
51  
52 524 and psychological functioning in individuals with myotonic muscular dystrophy  
53  
54 525 and facioscapulohumeral dystrophy. *Clin J Pain.* 2012 Jan;28(1):47–54.  
55  
56  
57 526 35. Faul F, Erdfelder E, Lang A-G, Buchner A. G\*Power 3: a flexible statistical power  
58  
59 527 analysis program for the social, behavioral, and biomedical sciences. *Behav Res*

- 1  
2  
3 528 Methods. 2007 May;39(2):175–91.  
4  
5  
6 529 36. Kristjansdottir OB, Fors EA, Eide E, Finset A, Stensrud TL, van Dulmen S, et al.  
7  
8 530 A smartphone-based intervention with diaries and therapist-feedback to reduce  
9  
10 531 catastrophizing and increase functioning in women with chronic widespread  
11  
12 532 pain: randomized controlled trial. J Med Internet Res. 2013 Jan;15(1):e5.  
13  
14  
15 533 37. Macea DD, Gajos K, Daglia Calil YA, Fregni F. The efficacy of Web-based  
16  
17 534 cognitive behavioral interventions for chronic pain: a systematic review and  
18  
19 535 meta-analysis. J Pain. 2010 Oct;11(10):917–29.  
20  
21  
22  
23 536 38. Urbaniak, GC and Plous S. Research randomizer (version 4.0)[computer  
24  
25 537 software]. Social Psychology Network. 2013.  
26  
27  
28 538 39. Kantar World Panel. Smartphone OS sales market share. 2015. Available from:  
29  
30 539 <http://www.kantarworldpanel.com/global/smartphone-os-market-share>.  
31  
32 540 Retrieved May 05, 2019.  
33  
34  
35 541 40. Kaiser U, Kopkow C, Deckert S, Neustadt K, Jacobi L, Cameron P, et al.  
36  
37 542 Developing a core outcome domain set to assessing effectiveness of  
38  
39 543 interdisciplinary multimodal pain therapy: the VAPAIN consensus statement on  
40  
41 544 core outcome domains. Pain. 2018 Apr;159(4):673–83.  
42  
43  
44  
45 545 41. Dworkin RH, Turk DC, Farrar JT, Haythornthwaite JA, Jensen MP, Katz NP, et  
46  
47 546 al. Core outcome measures for chronic pain clinical trials: IMMPACT  
48  
49 547 recommendations. Pain. 2005 Jan;113(1–2):9–19.  
50  
51  
52 548 42. Attal N, Cruccu G, Baron R, Haanpaa M, Hansson P, Jensen TS, et al. EFNS  
53  
54 549 guidelines on the pharmacological treatment of neuropathic pain: 2010 revision.  
55  
56 550 Eur J Neurol. 2010 Sep;17(9):1113-e88.  
57  
58  
59 551 43. Varrassi G, Müller-Schwefe G, Pergolizzi J, Orónska A, Morlion B,

- 1  
2  
3 552 Mavrocordatos P, et al. Pharmacological treatment of chronic pain – the need for  
4  
5 553 CHANGE. *Curr Med Res Opin.* 2010;26(5):1231–45.  
6  
7  
8 554 44. Cleeland CS, Ryan KM. Pain assessment: global use of the Brief Pain Inventory.  
9  
10 555 *Ann Acad Med Singapore.* 1994 Mar;23(2):129–38.  
11  
12  
13 556 45. Sullivan MJL, Bishop SR, Pivik J. The Pain Catastrophizing Scale: Development  
14  
15 557 and validation. *Psychol Assess.* 1995 Dec;7(4):524–32.  
16  
17  
18 558 46. Zigmond AS, Snaith RP. The hospital anxiety and depression scale. *Acta*  
19  
20 559 *Psychiatr Scand.* 1983 Jun;67(6):361–70.  
21  
22  
23  
24 560 47. Gorin, A. A., & Stone AA. Recall biases and cognitive errors in retrospective self-  
25  
26 561 reports: A call for momentary assessments. In: Baum A, Revenson T, J. Singer,  
27  
28 562 editors. *Handbook of health psycholog.* Mahwah, NJ: Lawrence Erlbaum; 2001.  
29  
30 563 p. 405–13.  
31  
32  
33 564 48. Schwarz N. Retrospective and Concurrent Self-Reports: The Rationale for Real-  
34  
35 565 Time Data Capture. In: A. Stone, S. S. Shiffman, A. Atienza & LN, editor. *The*  
36  
37 566 *science of real-time data capture: Self-reports in health research.* New York:  
38  
39 567 Oxford University Pres; 2007. p. 11–26.  
40  
41  
42  
43 568 49. Alexander JC, Joshi GP. Smartphone applications for chronic pain  
44  
45 569 management : a critical appraisal. *J Pain Res.* 2016;9:731–4.  
46  
47  
48 570  
49  
50

51 **Author Statement:** All authors were strongly involved in the study conceptualization  
52  
53 572 and design and have reviewed and discussed the manuscript. IJ and CSR prepared  
54  
55 573 the first draft of the manuscript, which was then reviewed by AGP, DC, IZ, and JLG.  
56  
57  
58 574 After changes were incorporated, a final version was approved by all authors. IJ and  
59  
60

1  
2  
3 575 JLG are currently in charge of recruitment and IJ and CSR will be in charge of data  
4  
5 576 analysis.

6  
7  
8 577 **Funding:** Funded by *Plan de Promoción de la investigación Universitat Jaume I*. Ref  
9  
10 578 UJI-B2016-39 and a Predoctoral Grant (PREDOC/2017/26) by the Universitat Jaume I  
11  
12 579 to IJ. The first grant allowed for the development of the technological systems used in  
13  
14 580 the study (physician website and link to the app). The second grant serves to pay the  
15  
16 581 salary of the lead researcher and predoctoral candidate, IJ.

17  
18  
19  
20 582 **Competing interests:** The intellectual property of the Pain Monitor app is owned by  
21  
22 583 co-authors CSR, DC, IZ, and AGP. These authors declare that they do not have any  
23  
24 584 competing interests to declare as they do not receive any financial gain from these  
25  
26 585 technologies.

27  
28  
29  
30 586 **Ethics approval and consent to participate:** Ethical approval from the Hospital  
31  
32 587 General Universitari de Castelló was obtained, in accordance with the Declaration of  
33  
34 588 Helsinki. All participants provided written informed consent to participate in the study.  
35  
36 589 The informed consent form was approved by the ethics committee of the Hospital  
37  
38 590 General Universitari de Castelló.

39  
40  
41 591

## 42 43 44 592 **FIGURES**

45  
46  
47 593 Figure 1. Study schedule of enrolment, interventions, and assessments.

48  
49  
50 594 Figure 2. a) Pain Monitor Instructions; b) Pain Monitor assessment of pain intensity; c)  
51  
52 595 Pain Monitor assessment of fatigue.

53  
54  
55 596 Figure 3. Examples of the web for the physician. a) Patient's side effects during 30  
56  
57 597 days. b) Patient morning values on Pain, Fatigue and Interference on sleep. c)  
58  
59 598 Distribution of patient side effects.



1  
2  
3  
4  
5  
6  
7  
8  
9  
10  
11  
12  
13  
14  
15  
16  
17  
18  
19  
20  
21  
22  
23  
24  
25  
26  
27  
28  
29  
30  
31  
32  
33  
34  
35  
36  
37  
38  
39  
40  
41  
42  
43  
44  
45  
46  
47  
48  
49  
50  
51  
52  
53  
54  
55  
56  
57  
58  
59  
60

599

For peer review only

## STUDY PERIOD

|                           | <b>Pre-intervention</b> | <b>Intervention period</b> | <b>Close-out</b>           |
|---------------------------|-------------------------|----------------------------|----------------------------|
| <b>TIMEPOINT</b>          | <b>0</b>                | <b>T<sub>1</sub></b>       | <b>T<sub>2</sub></b>       |
|                           | <i>Pre-Intervention</i> | <i>Between assessments</i> | <i>One month follow-up</i> |
| <b>ENROLMENT:</b>         |                         |                            |                            |
| Eligibility screen        | X                       |                            |                            |
| Informed consent          | X                       |                            |                            |
| Allocation                | X                       |                            |                            |
| <b>INTERVENTIONS:</b>     |                         |                            |                            |
| Medical treatment         |                         | X                          |                            |
| App use                   |                         | App condition only         |                            |
| <b>ASSESSMENTS:</b>       |                         |                            |                            |
| Demographics              | X                       |                            | X                          |
| <b>Primary outcomes</b>   |                         |                            |                            |
| Pain intensity            | X                       | App condition only         | X                          |
| Physical symptoms         | X                       | App condition only         | X                          |
| <b>Secondary outcomes</b> |                         |                            |                            |
| Pain interference         | X                       | App condition only         | X                          |
| Mood                      | X                       | App condition only         | X                          |
| Fatigue                   | X                       | App condition only         | X                          |
| Rescue medication         | X                       | App condition only         | X                          |
| Quality of life           | X                       | App condition only         | X                          |



a) Pain Monitor Instructions; b) Pain Monitor assessment of pain intensity; c) Pain Monitor assessment of fatigue.

289x168mm (300 x 300 DPI)

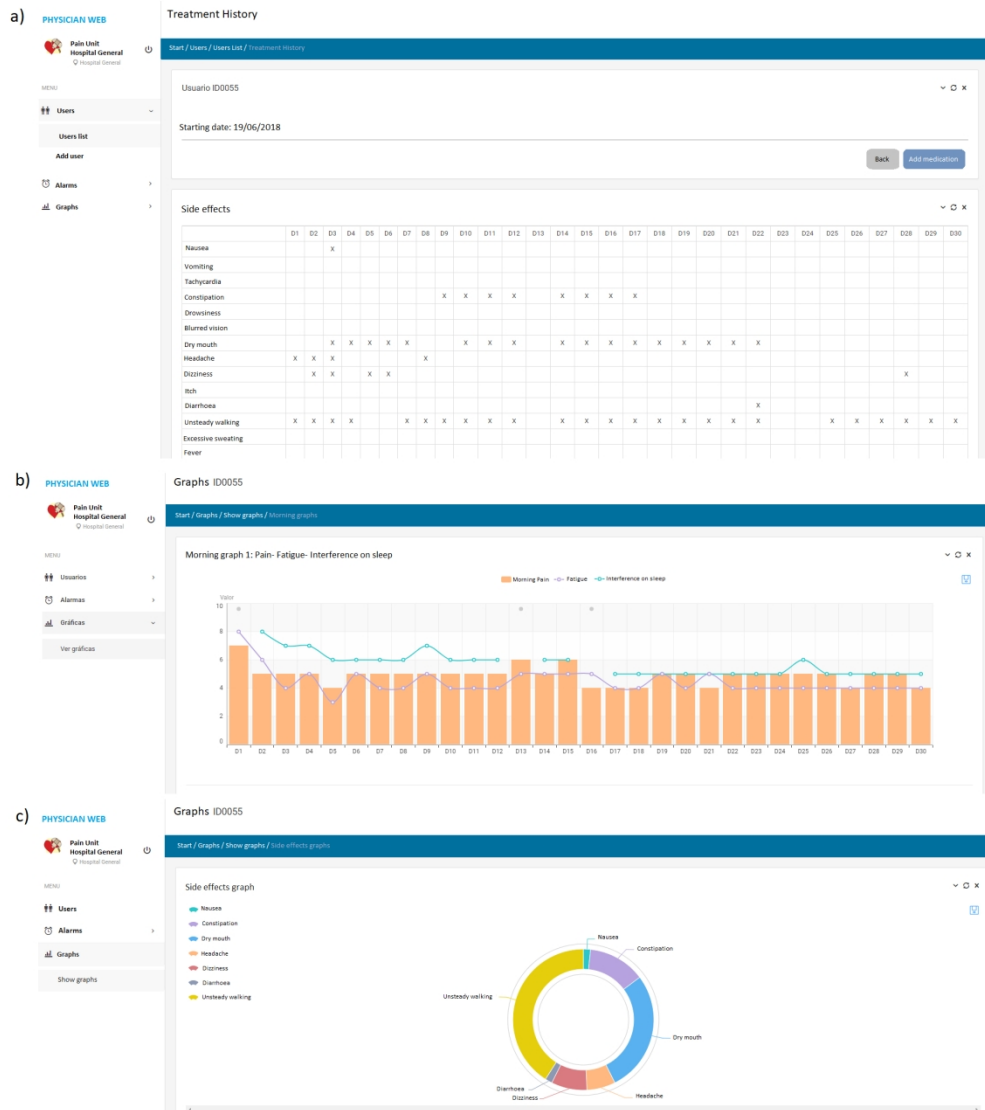

Examples of the web for the physician. a) Patient's side effects during 30 days. b) Patient morning values on Pain, Fatigue and Interference on sleep. c) Distribution of patient side effects.

168x189mm (300 x 300 DPI)

## Supplement 1. WHO registration dataset

| <b>Data category</b>                          | <b>Information</b>                                                                                                                                                                                                                                                                                                                                                                                                                                                                                                                                                                                                                                                                                                                                                                                                                                                                                                                                                                                                                        |
|-----------------------------------------------|-------------------------------------------------------------------------------------------------------------------------------------------------------------------------------------------------------------------------------------------------------------------------------------------------------------------------------------------------------------------------------------------------------------------------------------------------------------------------------------------------------------------------------------------------------------------------------------------------------------------------------------------------------------------------------------------------------------------------------------------------------------------------------------------------------------------------------------------------------------------------------------------------------------------------------------------------------------------------------------------------------------------------------------------|
| Primary registry and trial identifying number | ClinicalTrials.gov<br>NCT03606265                                                                                                                                                                                                                                                                                                                                                                                                                                                                                                                                                                                                                                                                                                                                                                                                                                                                                                                                                                                                         |
| Date of registration in primary registry      | July 30, 2018                                                                                                                                                                                                                                                                                                                                                                                                                                                                                                                                                                                                                                                                                                                                                                                                                                                                                                                                                                                                                             |
| Secondary identifying numbers                 | UJI-B2016-39,                                                                                                                                                                                                                                                                                                                                                                                                                                                                                                                                                                                                                                                                                                                                                                                                                                                                                                                                                                                                                             |
| Source(s) of monetary of material support     | Universitat Jaume I                                                                                                                                                                                                                                                                                                                                                                                                                                                                                                                                                                                                                                                                                                                                                                                                                                                                                                                                                                                                                       |
| Primary sponsor                               | Universitat Jaume I                                                                                                                                                                                                                                                                                                                                                                                                                                                                                                                                                                                                                                                                                                                                                                                                                                                                                                                                                                                                                       |
| Secondary sponsor(s)                          | None                                                                                                                                                                                                                                                                                                                                                                                                                                                                                                                                                                                                                                                                                                                                                                                                                                                                                                                                                                                                                                      |
| Contact for public queries                    | +34 964387640 azucena@uji.es                                                                                                                                                                                                                                                                                                                                                                                                                                                                                                                                                                                                                                                                                                                                                                                                                                                                                                                                                                                                              |
| Contact for scientific queries                | +34 964387649 ijaen@uji.es                                                                                                                                                                                                                                                                                                                                                                                                                                                                                                                                                                                                                                                                                                                                                                                                                                                                                                                                                                                                                |
| Public title                                  | Utility od a Web-based App for Chronic Pain                                                                                                                                                                                                                                                                                                                                                                                                                                                                                                                                                                                                                                                                                                                                                                                                                                                                                                                                                                                               |
| Scientific title                              | Improving chronic pain management with eHealth and mHealth: study protocol for a randomized controlled trial                                                                                                                                                                                                                                                                                                                                                                                                                                                                                                                                                                                                                                                                                                                                                                                                                                                                                                                              |
| Countries of recruitment                      | Spain                                                                                                                                                                                                                                                                                                                                                                                                                                                                                                                                                                                                                                                                                                                                                                                                                                                                                                                                                                                                                                     |
| Health condition(s) or problem(s) studied     | Chronic pain                                                                                                                                                                                                                                                                                                                                                                                                                                                                                                                                                                                                                                                                                                                                                                                                                                                                                                                                                                                                                              |
| Intervention(s)                               | Device: Treatment as usual+App+Web<br>Device: Treatment as usual                                                                                                                                                                                                                                                                                                                                                                                                                                                                                                                                                                                                                                                                                                                                                                                                                                                                                                                                                                          |
| Key inclusion and exclusion criteria          | <p>Inclusion Criteria:</p> <ul style="list-style-type: none"> <li>The patient is over 18 years of age</li> <li>The patient has a mobile phone with Android operating system</li> <li>The patient has the physical ability to use the application</li> <li>The patient does not present psychological and / or cognitive alterations or problems with language that make their participation difficult</li> <li>The patient voluntarily wants to participate and signs the informed consent</li> </ul> <p>Exclusion Criteria:</p> <ul style="list-style-type: none"> <li>The patient is under 18 years</li> <li>The patient does not have a mobile phone or has a mobile phone in which Android is not the operating system (the app is currently only available for Android for economic reasons)</li> <li>The patient does not have the physical capacity to use the application</li> <li>The patient does not have the capacity to participate due to psychological and / or cognitive alterations or problems with language</li> </ul> |

|                         |                                                                                                                                                                          |
|-------------------------|--------------------------------------------------------------------------------------------------------------------------------------------------------------------------|
|                         | The patient does not want to participate                                                                                                                                 |
| Study type              | Interventional                                                                                                                                                           |
| Date of first enrolment | August, 2018                                                                                                                                                             |
| Target sample size      | 250                                                                                                                                                                      |
| Recruitment status      | Ongoing                                                                                                                                                                  |
| Primary outcome(s)      | Changes in pain intensity and side effects                                                                                                                               |
| Key secondary outcomes  | Changes in pain-related variables as mood (depression and anxiety), pain interference, pain catastrophizing, and use of pain-related health resources in the past month. |

For peer review only

## Supplement 2: Study information sheet and informed consent

### INFORMATION ABOUT THE STUDY

You have shown your interest in participating in a scientific study of Universitat Jaume I and the Hospital General de Castellón. Your participation in the study is completely voluntary. You will then be asked to provide us with your written consent to participate in this study. There will be no inconvenience if you do not wish to participate and your decision will in no way affect the treatment received at the Hospital General de Castellón. In addition, you may discontinue your participation at any time. Please, read the following text carefully and do not hesitate to ask any questions.

#### Why is this study being carried out?

This study is part of a project called "DOLOR-TIC. Development and validation of an eHealth network for chronic pain" (REF: UJI-B2016-39) funded by the Plan de Promoción de la investigación Universitat Jaume I. The general objective of this project is to explore the benefits of using a network of technologies for the evaluation and treatment of chronic pain. The treatment by means of new technologies will be compared with the usual treatment provided in the pain unit of the Hospital General de Castellón.

#### What will be the procedure implemented in the study?

In the first sessions we will examine your state of health and check whether it meets the criteria for inclusion in the study. If you meet the established inclusion criteria, you will then be assigned to one of two study conditions: a) Habitual Treatment (TAU) or b) TAU supported by new technologies (TAU+ICTs). You will receive this treatment for 1 month and your clinical status will be evaluated before starting treatment, at the end of treatment (1 month). If, in fact, the treatments supported by the new technologies prove to be more effective than the usual treatment, you will be offered the possibility of benefiting from the treatment of new technologies at the end of the study, whether you were initially assigned to the TAU condition or to the TAU+TICs condition.

#### Are there any risks associated with my participation?

According to existing knowledge, the evaluation and treatment protocol used in this study does not pose risks to participants.

#### What are the possible benefits of my participation?

The treatment protocols included in this study are designed to improve your health. Your participation in this study will contribute to improving the health of a large number of citizens of the Spanish state. In addition, if the objectives of the study are achieved, the results will lead to a significant reduction in treatment costs and a

1  
2  
3 reduction in the increase in access to health services for a large number of people who  
4 do not have access to health services suffer from mental disorders.  
5

### 6 **How will my data be treated?**

7  
8 All data relevant to the study will be collected and stored in compliance with data  
9 protection regulations in force. These data will only be used anonymously for the  
10 purpose of scientific analysis. All persons involved in the study have an obligation to  
11 comply with data protection laws. We will make sure that all your information - without  
12 restrictions - is treated as in a confidential manner. Any data collected will be deleted as  
13 soon as it is not necessary for scientific purposes.  
14  
15  
16

### 17 **Can I decline or suspend my participation?**

18  
19 Yes, you may refuse to participate in this study or terminate your participation at any  
20 time. In the event that you decide to discontinue your participation in the study all of  
21 your data will be destroyed immediately.  
22  
23

### 24 **Who is the researcher responsible for the study?**

25  
26 Dr. Azucena García Palacios, Department of Basic Psychology, Clinic and  
27 Psychobiology, Universitat Jaume I (Castellón de la Plana), Tel: 964 387 640, E-mail:  
28 azucena@uji.es  
29  
30

31 You may contact the principal investigator if you have any questions, concerns about  
32 the study, about the data being collected, or if you wish to make use of your right to  
33 suspend your participation.  
34  
35  
36  
37  
38  
39  
40  
41  
42  
43  
44  
45  
46  
47  
48  
49  
50  
51  
52  
53  
54  
55  
56  
57  
58  
59  
60



## INFORMED CONSENT

Study DOLOR-TIC. Development and validation of an eHealth network for chronic pain. REF: UJI-B2016-39.

I (first name and last name) \_\_\_\_\_

- I have read the information sheet given to me.
- I was able to ask questions about the study.
- I have received enough information about the study.

I've been talking to: \_\_\_\_\_ (name of researcher).

I understand that my participation is voluntary.

I understand that I can withdraw from the study:

1. When I want to
2. Without having to give explanations
3. Without this affecting my medical care

I freely give my consent to participate in the study.

Date: .../ ... /...

Date: .../ ... /...

Participant's signature:

Researcher's signature:

### Revocation of consent:

I revoke the consent given on ..../..../..... and I do not wish to continue in the study that

I give on this date for finished.

Signature of participant:

Signature of investigator:

### Supplement 3: Items in the Pain Monitor app

*Items assessed once, the first day of app use:*

1. Please indicate your date of birth (DD/MM/YYYY)
2. Please indicate your gender:
  - a. Male
  - b. Female
3. Please indicate your type of pain. You may select more than one option:
  - a. Fibromyalgia
  - b. Low back pain
  - c. Cervical pain
  - d. Rheumatoid arthritis
  - e. Osteoarthritis; Headache
  - f. Neuropathic pain
  - g. Cancer pain
  - h. None of the above
4. If you selected “None of the above” please indicate your type of pain. Otherwise, leave this question blank. Press OK to continue.
5. Please indicate the location where your pain is more intense:
  - a. Head
  - b. Shoulder
  - c. Neck
  - d. High back
  - e. Lower back
  - f. Arm
  - g. Elbow
  - h. Wrist
  - i. Hand
  - j. Abdomen
  - k. Chest
  - l. Buttock
  - m. Hip
  - n. Leg
  - o. Knee
  - p. Foot
  - q. Whole body
  - r. Somewhere not listed
6. Who is currently treating your pain? You may select more than one option:
  - a. General practitioner
  - b. Rheumatologist
  - c. Orthopedic specialist
  - d. Rehabilitation physician
  - e. Psychiatrist
  - f. Pain Unit

- 1  
2  
3 g. Neurosurgeon  
4 h. Neurologist  
5 i. Oncologist  
6 j. Another professional.  
7  
8  
9 7. When did your current pain start?  
10 a. Less than one year ago  
11 b. Between 1 and 5 years ago  
12 c. Between 5 and 10 years ago  
13 d. More than 10 years ago  
14  
15  
16 8. What is your current treatment for pain? You may select more than one option:  
17 a. Physiotherapy  
18 b. Pharmacotherapy  
19 c. Infiltrations  
20 d. Psychological treatment  
21 e. Natural / alternative treatments  
22 f. My pain is not being treated  
23  
24  
25 9. Did you start a new treatment for pain in the last month?  
26 a. Yes  
27 b. No  
28  
29  
30 10. Please select the treatment/s you started in the last month. You may select more  
31 than one option:  
32 a. Physiotherapy  
33 b. Pharmacotherapy  
34 c. Infiltrations  
35 d. Psychological treatment  
36 e. Natural / alternative treatments  
37 f. I have not started a new treatment  
38  
39  
40 11. What is your marital status?  
41 a. Single  
42 b. Married  
43 c. In a relationship  
44 d. Divorced  
45 e. Separated  
46 f. Widowed  
47  
48  
49 12. What is your job status?  
50 a. Active worker  
51 b. Sick leave  
52 c. Permanent disability  
53 d. Unemployed  
54 e. Homemaker  
55 f. Retired  
56 g. Student  
57  
58  
59 13. What is the highest level of education you have completed?  
60

- 1
- 2
- 3 a. No studies
- 4 b. Less than high school
- 5 c. High school graduate
- 6 d. Technical training
- 7 e. University degree
- 8
- 9

10 14. Do you currently have a diagnosis of depression by a physician or a  
11 psychologist?

- 12 a. Yes
- 13 b. No
- 14
- 15

16 15. Do you currently have a diagnosis of anxiety by a physician or a psychologist?

- 17 a. Yes
- 18 b. No
- 19
- 20

21 *Items assessed twice a day and in the event of acute pain episodes:*

22 16. Please indicate the intensity of your CURRENT PAIN:

23 0 No pain -----10 Extreme pain

24 17. Please indicate the intensity of your CURRENT FATIGUE:

25 0 No fatigue -----10 Extreme fatigue

26 18. Please indicate the intensity of your CURRENT HAPPINESS:

27 0 No happiness -----10 Extremely happy

28 19. Please indicate the intensity of your CURRENT SADNESS:

29 0 No sadness ----- 10 Extremely sad

30 20. Please indicate the intensity of your CURRENT ANXIETY:

31 0 No anxiety ----- 10 Extremely anxious

32 21. Please indicate the intensity of your CURRENT ANGER:

33 0 No anger ----- 10 Extremely angry

34 22. Does your pain have any of these characteristics? You may select more than one  
35 option:

- 36 a. Burning
- 37 b. Painful cold
- 38 c. Electric shocks
- 39 d. Tingling
- 40 e. Pins and needles
- 41 f. Numbness
- 42 g. Itching
- 43 h. Reduced sensitivity to touch
- 44
- 45
- 46
- 47
- 48
- 49
- 50
- 51
- 52
- 53
- 54
- 55
- 56
- 57
- 58
- 59
- 60

- i. Pain when brushing against the skin
- j. None of the above

*Items assessed in the morning:*

23. In general, your HEALTH is:

- 1) Very poor
- 2) Poor
- 3) Average
- 4) Good
- 5) Very good

24. Did your PAIN interfere with the quality of your SLEEP LAST NIGHT?

0 No interference ----- 10 Maximum interference

25. Indicate your degree of agreement with the following sentence: With my current pain, I should not do my usual job (it includes housework and work outside the home).

- 1) Strongly disagree
- 2) Disagree
- 3) Neither agree nor disagree
- 4) Agree
- 5) Strongly agree

26. Indicate your degree of agreement with the following sentence: Experiencing pain is terrible and I feel that pain is stronger than me.

- 1) Strongly disagree
- 2) Disagree
- 3) Neither agree nor disagree
- 4) Agree
- 5) Strongly agree

27. Indicate your degree of agreement with the following sentence: I need some control over pain before I can make serious plans.

- 1) Strongly disagree
- 2) Disagree
- 3) Neither agree nor disagree
- 4) Agree
- 5) Strongly agree

28. Indicate your degree of agreement with the following sentence: Physical activity aggravates my pain.

- 1) Strongly disagree

- 2) Disagree
- 3) Neither agree nor disagree
- 4) Agree
- 5) Strongly agree

29. Indicate your degree of agreement with the following sentence: I am living a rewarding life despite my pain.

- 1) Strongly disagree
- 2) Disagree
- 3) Neither agree nor disagree
- 4) Agree
- 5) Strongly agree

*Items assessed in the evening:*

30. Did your PAIN interfere with your ability to perform your USUAL WORK or HOUSEWORK TODAY?

0 No interference ----- 10 Maximum interference

31. Did your PAIN interfere with your LEISURE ACTIVITIES TODAY?

0 No interference ----- 10 Maximum interference

32. Did your PAIN interfere with your SOCIAL INTERACTIONS TODAY?

0 No interference ----- 10 Maximum interference

33. Which STRATEGY did you use to COPE WITH YOUR PAIN TODAY? You may select more than one option:

- a. Inactivity / rest
- b. Relaxation exercise
- c. Speak with someone
- d. Physical Activity / Stretching
- e. Self-statements to persist in a task
- f. Do something to feel positive emotions
- g. Ignore the pain/distract
- h. Pray for the pain to disappear

34. Indicate your degree of agreement with the following sentence: I fear that the pain will get worse.

- 1) Strongly disagree
- 2) Disagree
- 3) Neither agree nor disagree
- 4) Agree
- 5) Strongly agree

1  
2  
3 35. Indicate your degree of agreement with the following sentence: Today I could  
4 not keep my pain out of my mind.

- 5 1) Strongly disagree  
6 2) Disagree  
7 3) Neither agree nor disagree  
8 4) Agree  
9 5) Strongly agree  
10  
11  
12

13  
14 36. Please rate your degree of activity TODAY:  
15 0%= Completely inactive -100%= Completely active.  
16

17  
18 37. In which area have you been more active today? You may select more than one  
19 option:

- 20 a. Work  
21 b. Family  
22 c. Couple  
23 d. Friends  
24 e. Leisure  
25 f. Physical activity  
26 g. Other.  
27  
28  
29

30  
31 38. Did you take a rescue medication TODAY (i.e., medication you only use in the  
32 event of acute pain)?

- 33 a. Yes  
34 b. No  
35  
36

37  
38 39. Did you experience any of these symptoms TODAY? You may select more than  
39 one option:

- 40 a. Nausea  
41 b. Vomiting  
42 c. Tachycardia  
43 d. Constipation  
44 e. Drowsiness / sedation  
45 f. Blurred vision  
46 g. Dry mouth  
47 h. Headache  
48 i. None of the above  
49  
50  
51  
52

53  
54 40. Did you experience any of these symptoms TODAY? You may select more than  
55 one option:

- 56 a. Dizziness  
57 b. Itching  
58 c. Diarrhea  
59 d. Gait instability  
60

- e. Excessive sweating
- f. Fever
- g. Urine retention
- h. Facial redness
- i. A different symptom
- j. None of the above

41. Did you take your prescribed medication TODAY?

- a. Yes
- b. No, but I will do it later
- c. No and I do not plan to take it
- d. I haven't been prescribed a pain medication

42. How many times did you take a rescue medication TODAY?

- a. 0
- b. 1
- c. 2
- d. 3
- e. 4
- f. 5
- g. 6
- h. 7
- i. 8
- j. 9
- k. 10
- l. More than 10

*Items assessed the last day of app use:*

43. With respect to the beginning of treatment, how are you feeling NOW?

- 1) Much worse
- 2) Somewhat worse
- 3) The same
- 4) Somewhat better
- 5) Much better

44. Have you experienced any negative life event in the PAST MONTH?

- a. No
- b. Yes, but it did not affect me at all
- c. Yes, but it did not affect me much
- d. Yes and it had quite an effect on me
- e. Yes and it affected me a lot



- 1  
2  
3  
4  
5  
6  
7  
8  
9  
10  
11  
12  
13  
14  
15  
16  
17  
18  
19  
20  
21  
22  
23  
24  
25  
26  
27  
28  
29  
30  
31  
32  
33  
34  
35  
36  
37  
38  
39  
40  
41  
42  
43  
44  
45  
46  
47  
48  
49  
50  
51  
52  
53  
54  
55  
56  
57  
58  
59  
60
45. If you experienced a major negative life event in the last month, please indicate its characteristics using the list below. You may select more than one option:
- Death of a close person
  - Job problem
  - Relationship problem
  - Economic problem
  - Health problem
  - Family problem
  - An event not listed above
  - I have not experienced any major negative event this month
46. Please indicate the location where your pain is more intense:
- Head
  - Shoulder
  - Neck
  - High back
  - Lower back
  - Arm
  - Elbow
  - Wrist
  - Hand
  - Abdomen
  - Chest
  - Buttock
  - Hip
  - Leg
  - Knee
  - Foot
  - Whole body
  - Somewhere not listed
47. What is your current treatment for pain? You may select more than one option:
- Physiotherapy
  - Pharmacotherapy
  - Infiltrations
  - Psychological treatment
  - Natural / alternative treatments
  - My pain is not being treated
48. Did you start a new treatment for pain in the last month?
- Yes
  - No
49. Please select the treatment/s you started in the last month. You may select more than one option:
- Physiotherapy
  - Pharmacotherapy
  - Infiltrations
  - Psychological treatment

- 1  
2  
3 e. Natural / alternative treatments  
4 f. I have not started a new treatment  
5  
6

7 50. What is your marital status?

- 8 a. Single  
9 b. Married  
10 c. In a relationship  
11 d. Divorced  
12 e. Separated  
13 f. Widowed  
14

15  
16 51. What is your job status?

- 17 a. Active worker  
18 b. Sick leave  
19 c. Permanent disability  
20 d. Unemployed  
21 e. Homemaker  
22 f. Retired  
23 g. Student  
24  
25

26 52. Do you currently have a diagnosis of depression by a physician or a  
27 psychologist?

- 28 a. Yes  
29 b. No  
30  
31

32 53. Do you currently have a diagnosis of anxiety by a physician or a psychologist?

- 33 a. Yes  
34 b. No  
35  
36  
37  
38  
39  
40  
41  
42  
43  
44  
45  
46  
47  
48  
49  
50  
51  
52  
53  
54  
55  
56  
57  
58  
59  
60

**Supplement 4: Alarms integrated into the Pain Monitor app**

- Morning pain severity > 7 during 5 consecutive days
- Evening pain severity > 7 during 5 consecutive days
- Morning sadness >7 during 5 consecutive days
- Evening sadness >7 during 5 consecutive days
- Morning anxiety >7 during 5 consecutive days
- Evening anxiety >7 during 5 consecutive days
- Vomiting during 2 consecutive days
- Tachycardia during 2 consecutive days
- Blurred vision during 2 consecutive days
- Headache during 2 consecutive days
- Dry mouth during 2 consecutive days
- Constipation during 5 consecutive days
- Drowsiness during 5 consecutive days
- Nausea during 3 consecutive days
- Itching during 3 consecutive days
- Diarrhea during 2 consecutive days
- Fever during 2 consecutive days
- Facial redness during 2 consecutive days
- Urine retention during 2 consecutive days
- Gait instability during 3 consecutive days
- Excessive sweating during 7 consecutive days
- Dizziness during 3 consecutive days
- Treatment discontinuation during 3 consecutive days
- Rescue medication > 3 during 3 consecutive days
- Sleep interference > 7 during 5 consecutive days

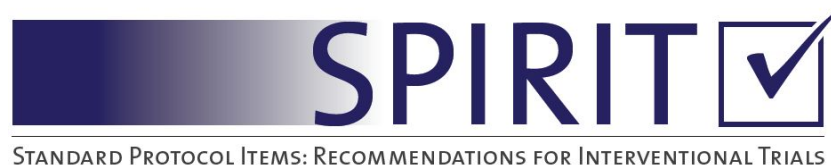

STANDARD PROTOCOL ITEMS: RECOMMENDATIONS FOR INTERVENTIONAL TRIALS

## Additional file 2: SPIRIT Checklist

SPIRIT 2013 Checklist: Recommended items to address in a clinical trial protocol and related documents\*

| Section/item                      | Item No | Description                                                                                                                                                                                                                                                                              | Addressed on page number          |
|-----------------------------------|---------|------------------------------------------------------------------------------------------------------------------------------------------------------------------------------------------------------------------------------------------------------------------------------------------|-----------------------------------|
| <b>Administrative information</b> |         |                                                                                                                                                                                                                                                                                          |                                   |
| Title                             | 1       | Descriptive title identifying the study design, population, interventions, and, if applicable, trial acronym                                                                                                                                                                             | Title, page 1                     |
| Trial registration                | 2a      | Trial identifier and registry name. If not yet registered, name of intended registry                                                                                                                                                                                                     | Abstract, page 1                  |
|                                   | 2b      | All items from the World Health Organization Trial Registration Data Set                                                                                                                                                                                                                 | Additional file 1                 |
| Protocol version                  | 3       | Date and version identifier                                                                                                                                                                                                                                                              | Protocol Amendment Number, page 1 |
| Funding                           | 4       | Sources and types of financial, material, and other support                                                                                                                                                                                                                              | Declarations, page 14             |
| Roles and responsibilities        | 5a      | Names, affiliations, and roles of protocol contributors                                                                                                                                                                                                                                  | Authors, page 1                   |
|                                   | 5b      | Name and contact information for the trial sponsor                                                                                                                                                                                                                                       | Trial sponsor, page 1             |
|                                   | 5c      | Role of study sponsor and funders, if any, in study design; collection, management, analysis, and interpretation of data; writing of the report; and the decision to submit the report for publication, including whether they will have ultimate authority over any of these activities | Declarations, page 14             |

|    |                                                           |     |                                                                                                                                                                                                                                                                  |                                              |
|----|-----------------------------------------------------------|-----|------------------------------------------------------------------------------------------------------------------------------------------------------------------------------------------------------------------------------------------------------------------|----------------------------------------------|
| 1  |                                                           | 5d  | Composition, roles, and responsibilities of the coordinating centre, steering committee, endpoint adjudication committee, data management team, and other individuals or groups overseeing the trial, if applicable (see Item 21a for data monitoring committee) | Methods, Page 12                             |
| 2  |                                                           |     |                                                                                                                                                                                                                                                                  |                                              |
| 3  |                                                           |     |                                                                                                                                                                                                                                                                  |                                              |
| 4  |                                                           |     |                                                                                                                                                                                                                                                                  |                                              |
| 5  |                                                           |     |                                                                                                                                                                                                                                                                  |                                              |
| 6  |                                                           |     |                                                                                                                                                                                                                                                                  |                                              |
| 7  | <b>Introduction</b>                                       |     |                                                                                                                                                                                                                                                                  |                                              |
| 8  |                                                           |     |                                                                                                                                                                                                                                                                  |                                              |
| 9  | Background and rationale                                  | 6a  | Description of research question and justification for undertaking the trial, including summary of relevant studies (published and unpublished) examining benefits and harms for each intervention                                                               | Introduction, page 1-3                       |
| 10 |                                                           |     |                                                                                                                                                                                                                                                                  |                                              |
| 11 |                                                           |     |                                                                                                                                                                                                                                                                  |                                              |
| 12 |                                                           | 6b  | Explanation for choice of comparators                                                                                                                                                                                                                            | Method, page 6                               |
| 13 |                                                           |     |                                                                                                                                                                                                                                                                  |                                              |
| 14 | Objectives                                                | 7   | Specific objectives or hypotheses                                                                                                                                                                                                                                | Introduction, page 3                         |
| 15 |                                                           |     |                                                                                                                                                                                                                                                                  |                                              |
| 16 |                                                           |     |                                                                                                                                                                                                                                                                  |                                              |
| 17 | Trial design                                              | 8   | Description of trial design including type of trial (eg, parallel group, crossover, factorial, single group), allocation ratio, and framework (eg, superiority, equivalence, noninferiority, exploratory)                                                        | Introduction, page 5                         |
| 18 |                                                           |     |                                                                                                                                                                                                                                                                  |                                              |
| 19 |                                                           |     |                                                                                                                                                                                                                                                                  |                                              |
| 20 |                                                           |     |                                                                                                                                                                                                                                                                  |                                              |
| 21 |                                                           |     |                                                                                                                                                                                                                                                                  |                                              |
| 22 | <b>Methods: Participants, interventions, and outcomes</b> |     |                                                                                                                                                                                                                                                                  |                                              |
| 23 |                                                           |     |                                                                                                                                                                                                                                                                  |                                              |
| 24 | Study setting                                             | 9   | Description of study settings (eg, community clinic, academic hospital) and list of countries where data will be collected. Reference to where list of study sites can be obtained                                                                               | Sample, page 6                               |
| 25 |                                                           |     |                                                                                                                                                                                                                                                                  |                                              |
| 26 |                                                           |     |                                                                                                                                                                                                                                                                  |                                              |
| 27 | Eligibility criteria                                      | 10  | Inclusion and exclusion criteria for participants. If applicable, eligibility criteria for study centres and individuals who will perform the interventions (eg, surgeons, psychotherapists)                                                                     | Table 1, page 7                              |
| 28 |                                                           |     |                                                                                                                                                                                                                                                                  |                                              |
| 29 |                                                           |     |                                                                                                                                                                                                                                                                  |                                              |
| 30 | Interventions                                             | 11a | Interventions for each group with sufficient detail to allow replication, including how and when they will be administered                                                                                                                                       | Interventions and Assessment plan, page 8-11 |
| 31 |                                                           |     |                                                                                                                                                                                                                                                                  |                                              |
| 32 |                                                           |     |                                                                                                                                                                                                                                                                  |                                              |
| 33 |                                                           |     |                                                                                                                                                                                                                                                                  |                                              |
| 34 |                                                           |     |                                                                                                                                                                                                                                                                  |                                              |
| 35 |                                                           | 11b | Criteria for discontinuing or modifying allocated interventions for a given trial participant (eg, drug dose change in response to harms, participant request, or improving/worsening disease)                                                                   | Sample, page 7-8                             |
| 36 |                                                           |     |                                                                                                                                                                                                                                                                  |                                              |
| 37 |                                                           |     |                                                                                                                                                                                                                                                                  |                                              |
| 38 |                                                           | 11c | Strategies to improve adherence to intervention protocols, and any procedures for monitoring adherence (eg, drug tablet return, laboratory tests)                                                                                                                | Procedure, page 8                            |
| 39 |                                                           |     |                                                                                                                                                                                                                                                                  |                                              |
| 40 |                                                           |     |                                                                                                                                                                                                                                                                  |                                              |
| 41 |                                                           |     |                                                                                                                                                                                                                                                                  |                                              |
| 42 |                                                           |     |                                                                                                                                                                                                                                                                  |                                              |
| 43 |                                                           |     |                                                                                                                                                                                                                                                                  |                                              |
| 44 |                                                           |     |                                                                                                                                                                                                                                                                  |                                              |
| 45 |                                                           |     |                                                                                                                                                                                                                                                                  |                                              |
| 46 |                                                           |     |                                                                                                                                                                                                                                                                  |                                              |

|    |                      |     |                                                                                                                                                                                                                                                                                                                                                                                |                             |
|----|----------------------|-----|--------------------------------------------------------------------------------------------------------------------------------------------------------------------------------------------------------------------------------------------------------------------------------------------------------------------------------------------------------------------------------|-----------------------------|
| 1  |                      | 11d | Relevant concomitant care and interventions that are permitted or prohibited during the trial                                                                                                                                                                                                                                                                                  | Interventions 9-10          |
| 2  | Outcomes             | 12  | Primary, secondary, and other outcomes, including the specific measurement variable (eg, systolic blood pressure), analysis metric (eg, change from baseline, final value, time to event), method of aggregation (eg, median, proportion), and time point for each outcome. Explanation of the clinical relevance of chosen efficacy and harm outcomes is strongly recommended | Assessment plan, page 10-11 |
| 3  |                      |     |                                                                                                                                                                                                                                                                                                                                                                                |                             |
| 4  |                      |     |                                                                                                                                                                                                                                                                                                                                                                                |                             |
| 5  | Participant timeline | 13  | Time schedule of enrolment, interventions (including any run-ins and washouts), assessments, and visits for participants. A schematic diagram is highly recommended (see Figure)                                                                                                                                                                                               | Figure 1                    |
| 6  |                      |     |                                                                                                                                                                                                                                                                                                                                                                                |                             |
| 7  | Sample size          | 14  | Estimated number of participants needed to achieve study objectives and how it was determined, including clinical and statistical assumptions supporting any sample size calculations                                                                                                                                                                                          | Sample, page 6-7            |
| 8  |                      |     |                                                                                                                                                                                                                                                                                                                                                                                |                             |
| 9  | Recruitment          | 15  | Strategies for achieving adequate participant enrolment to reach target sample size                                                                                                                                                                                                                                                                                            | Procedure, Page 8           |
| 10 |                      |     |                                                                                                                                                                                                                                                                                                                                                                                |                             |

**Methods: Assignment of interventions (for controlled trials)**

Allocation:

|    |                                  |     |                                                                                                                                                                                                                                                                                                                                                          |                   |
|----|----------------------------------|-----|----------------------------------------------------------------------------------------------------------------------------------------------------------------------------------------------------------------------------------------------------------------------------------------------------------------------------------------------------------|-------------------|
| 11 | Sequence generation              | 16a | Method of generating the allocation sequence (eg, computer-generated random numbers), and list of any factors for stratification. To reduce predictability of a random sequence, details of any planned restriction (eg, blocking) should be provided in a separate document that is unavailable to those who enrol participants or assign interventions | Sample, page 7    |
| 12 |                                  |     |                                                                                                                                                                                                                                                                                                                                                          |                   |
| 13 |                                  |     |                                                                                                                                                                                                                                                                                                                                                          |                   |
| 14 | Allocation concealment mechanism | 16b | Mechanism of implementing the allocation sequence (eg, central telephone; sequentially numbered, opaque, sealed envelopes), describing any steps to conceal the sequence until interventions are assigned                                                                                                                                                | Sample, page 7    |
| 15 |                                  |     |                                                                                                                                                                                                                                                                                                                                                          |                   |
| 16 | Implementation                   | 16c | Who will generate the allocation sequence, who will enrol participants, and who will assign participants to interventions                                                                                                                                                                                                                                | Procedure, page 8 |
| 17 |                                  |     |                                                                                                                                                                                                                                                                                                                                                          |                   |
| 18 | Blinding (masking)               | 17a | Who will be blinded after assignment to interventions (eg, trial participants, care providers, outcome assessors, data analysts), and how                                                                                                                                                                                                                | Pages 6 and 13    |
| 19 |                                  |     |                                                                                                                                                                                                                                                                                                                                                          |                   |
| 20 |                                  | 17b | If blinded, circumstances under which unblinding is permissible, and procedure for revealing a participant's allocated intervention during the trial                                                                                                                                                                                                     | Pages 6 and 13    |

## 1 **Methods: Data collection, management, and analysis**

|    |                     |     |                                                                                                               |
|----|---------------------|-----|---------------------------------------------------------------------------------------------------------------|
| 2  |                     |     |                                                                                                               |
| 3  |                     |     |                                                                                                               |
| 4  | Data collection     | 18a | Plans for assessment and collection of outcome, baseline, and other trial data, including any related         |
| 5  | methods             |     | processes to promote data quality (eg, duplicate measurements, training of assessors) and a description of    |
| 6  |                     |     | study instruments (eg, questionnaires, laboratory tests) along with their reliability and validity, if known. |
| 7  |                     |     | Reference to where data collection forms can be found, if not in the protocol                                 |
| 8  |                     |     |                                                                                                               |
| 9  |                     | 18b | Plans to promote participant retention and complete follow-up, including list of any outcome data to be       |
| 10 |                     |     | collected for participants who discontinue or deviate from intervention protocols                             |
| 11 |                     |     |                                                                                                               |
| 12 | Data management     | 19  | Plans for data entry, coding, security, and storage, including any related processes to promote data quality  |
| 13 |                     |     | (eg, double data entry; range checks for data values). Reference to where details of data management          |
| 14 |                     |     | procedures can be found, if not in the protocol                                                               |
| 15 |                     |     |                                                                                                               |
| 16 |                     |     |                                                                                                               |
| 17 | Statistical methods | 20a | Statistical methods for analysing primary and secondary outcomes. Reference to where other details of the     |
| 18 |                     |     | statistical analysis plan can be found, if not in the protocol                                                |
| 19 |                     |     |                                                                                                               |
| 20 |                     | 20b | Methods for any additional analyses (eg, subgroup and adjusted analyses)                                      |
| 21 |                     |     |                                                                                                               |
| 22 |                     | 20c | Definition of analysis population relating to protocol non-adherence (eg, as randomised analysis), and any    |
| 23 |                     |     | statistical methods to handle missing data (eg, multiple imputation)                                          |
| 24 |                     |     |                                                                                                               |
| 25 |                     |     |                                                                                                               |
| 26 |                     |     |                                                                                                               |
| 27 |                     |     |                                                                                                               |
| 28 |                     |     |                                                                                                               |
| 29 |                     |     |                                                                                                               |
| 30 | Data monitoring     | 21a | Composition of data monitoring committee (DMC); summary of its role and reporting structure; statement of     |
| 31 |                     |     | whether it is independent from the sponsor and competing interests; and reference to where further details    |
| 32 |                     |     | about its charter can be found, if not in the protocol. Alternatively, an explanation of why a DMC is not     |
| 33 |                     |     | needed                                                                                                        |
| 34 |                     |     |                                                                                                               |
| 35 |                     | 21b | Description of any interim analyses and stopping guidelines, including who will have access to these interim  |
| 36 |                     |     | results and make the final decision to terminate the trial                                                    |
| 37 |                     |     |                                                                                                               |
| 38 | Harms               | 22  | Plans for collecting, assessing, reporting, and managing solicited and spontaneously reported adverse         |
| 39 |                     |     | events and other unintended effects of trial interventions or trial conduct                                   |
| 40 |                     |     |                                                                                                               |
| 41 |                     |     |                                                                                                               |
| 42 |                     |     |                                                                                                               |
| 43 |                     |     |                                                                                                               |
| 44 |                     |     |                                                                                                               |
| 45 |                     |     |                                                                                                               |
| 46 |                     |     |                                                                                                               |

|    |                                 |     |                                                                                                                                                                                                                                                                                     |                                 |
|----|---------------------------------|-----|-------------------------------------------------------------------------------------------------------------------------------------------------------------------------------------------------------------------------------------------------------------------------------------|---------------------------------|
| 1  | Auditing                        | 23  | Frequency and procedures for auditing trial conduct, if any, and whether the process will be independent from investigators and the sponsor                                                                                                                                         | Not applicable                  |
| 2  |                                 |     |                                                                                                                                                                                                                                                                                     |                                 |
| 3  |                                 |     |                                                                                                                                                                                                                                                                                     |                                 |
| 4  | <b>Ethics and dissemination</b> |     |                                                                                                                                                                                                                                                                                     |                                 |
| 5  |                                 |     |                                                                                                                                                                                                                                                                                     |                                 |
| 6  | Research ethics approval        | 24  | Plans for seeking research ethics committee/institutional review board (REC/IRB) approval                                                                                                                                                                                           | Declarations, page 15           |
| 7  |                                 |     |                                                                                                                                                                                                                                                                                     |                                 |
| 8  |                                 |     |                                                                                                                                                                                                                                                                                     |                                 |
| 9  | Protocol amendments             | 25  | Plans for communicating important protocol modifications (eg, changes to eligibility criteria, outcomes, analyses) to relevant parties (eg, investigators, REC/IRBs, trial participants, trial registries, journals, regulators)                                                    | Page 8                          |
| 10 |                                 |     |                                                                                                                                                                                                                                                                                     |                                 |
| 11 |                                 |     |                                                                                                                                                                                                                                                                                     |                                 |
| 12 |                                 |     |                                                                                                                                                                                                                                                                                     |                                 |
| 13 |                                 |     |                                                                                                                                                                                                                                                                                     |                                 |
| 14 | Consent or assent               | 26a | Who will obtain informed consent or assent from potential trial participants or authorised surrogates, and how (see Item 32)                                                                                                                                                        | Sample, page 8                  |
| 15 |                                 |     |                                                                                                                                                                                                                                                                                     |                                 |
| 16 |                                 |     |                                                                                                                                                                                                                                                                                     |                                 |
| 17 |                                 | 26b | Additional consent provisions for collection and use of participant data and biological specimens in ancillary studies, if applicable                                                                                                                                               | Not applicable                  |
| 18 |                                 |     |                                                                                                                                                                                                                                                                                     |                                 |
| 19 |                                 |     |                                                                                                                                                                                                                                                                                     |                                 |
| 20 | Confidentiality                 | 27  | How personal information about potential and enrolled participants will be collected, shared, and maintained in order to protect confidentiality before, during, and after the trial                                                                                                | Sample, page 7-8                |
| 21 |                                 |     |                                                                                                                                                                                                                                                                                     |                                 |
| 22 |                                 |     |                                                                                                                                                                                                                                                                                     |                                 |
| 23 | Declaration of interests        | 28  | Financial and other competing interests for principal investigators for the overall trial and each study site                                                                                                                                                                       | Declarations, page 15           |
| 24 |                                 |     |                                                                                                                                                                                                                                                                                     |                                 |
| 25 |                                 |     |                                                                                                                                                                                                                                                                                     |                                 |
| 26 | Access to data                  | 29  | Statement of who will have access to the final trial dataset, and disclosure of contractual agreements that limit such access for investigators                                                                                                                                     | Data analysis, page 13          |
| 27 |                                 |     |                                                                                                                                                                                                                                                                                     |                                 |
| 28 |                                 |     |                                                                                                                                                                                                                                                                                     |                                 |
| 29 |                                 |     |                                                                                                                                                                                                                                                                                     |                                 |
| 30 | Ancillary and post-trial care   | 30  | Provisions, if any, for ancillary and post-trial care, and for compensation to those who suffer harm from trial participation                                                                                                                                                       | Sample, page 8                  |
| 31 |                                 |     |                                                                                                                                                                                                                                                                                     |                                 |
| 32 |                                 |     |                                                                                                                                                                                                                                                                                     |                                 |
| 33 | Dissemination policy            | 31a | Plans for investigators and sponsor to communicate trial results to participants, healthcare professionals, the public, and other relevant groups (eg, via publication, reporting in results databases, or other data sharing arrangements), including any publication restrictions | Study design, page 6            |
| 34 |                                 |     |                                                                                                                                                                                                                                                                                     |                                 |
| 35 |                                 |     |                                                                                                                                                                                                                                                                                     |                                 |
| 36 |                                 |     |                                                                                                                                                                                                                                                                                     |                                 |
| 37 |                                 |     |                                                                                                                                                                                                                                                                                     |                                 |
| 38 |                                 | 31b | Authorship eligibility guidelines and any intended use of professional writers                                                                                                                                                                                                      | Authors' contributions, page 16 |
| 39 |                                 |     |                                                                                                                                                                                                                                                                                     |                                 |
| 40 |                                 |     |                                                                                                                                                                                                                                                                                     |                                 |
| 41 |                                 |     |                                                                                                                                                                                                                                                                                     |                                 |
| 42 |                                 |     |                                                                                                                                                                                                                                                                                     |                                 |
| 43 |                                 |     |                                                                                                                                                                                                                                                                                     |                                 |
| 44 |                                 |     |                                                                                                                                                                                                                                                                                     |                                 |
| 45 |                                 |     |                                                                                                                                                                                                                                                                                     |                                 |
| 46 |                                 |     |                                                                                                                                                                                                                                                                                     |                                 |



|    |                            |                                                                                                                                                                                                   |                                            |
|----|----------------------------|---------------------------------------------------------------------------------------------------------------------------------------------------------------------------------------------------|--------------------------------------------|
| 1  | 31c                        | Plans, if any, for granting public access to the full protocol, participant-level dataset, and statistical code                                                                                   | Availability of data and material, page 15 |
| 2  |                            |                                                                                                                                                                                                   |                                            |
| 3  |                            |                                                                                                                                                                                                   |                                            |
| 4  |                            |                                                                                                                                                                                                   |                                            |
| 5  |                            |                                                                                                                                                                                                   |                                            |
| 6  | <b>Appendices</b>          |                                                                                                                                                                                                   |                                            |
| 7  |                            |                                                                                                                                                                                                   |                                            |
| 8  | Informed consent materials | 32 Model consent form and other related documentation given to participants and authorised surrogates                                                                                             | Additional file 3                          |
| 9  |                            |                                                                                                                                                                                                   |                                            |
| 10 |                            |                                                                                                                                                                                                   |                                            |
| 11 | Biological specimens       | 33 Plans for collection, laboratory evaluation, and storage of biological specimens for genetic or molecular analysis in the current trial and for future use in ancillary studies, if applicable | Not applicable                             |
| 12 |                            |                                                                                                                                                                                                   |                                            |
| 13 |                            |                                                                                                                                                                                                   |                                            |

14 \*It is strongly recommended that this checklist be read in conjunction with the SPIRIT 2013 Explanation & Elaboration for important clarification on the items.  
 15 Amendments to the protocol should be tracked and dated. The SPIRIT checklist is copyrighted by the SPIRIT Group under the Creative Commons  
 16 "[Attribution-NonCommercial-NoDerivs 3.0 Unported](#)" license.  
 17  
 18  
 19  
 20  
 21  
 22  
 23  
 24  
 25  
 26  
 27  
 28  
 29  
 30  
 31  
 32  
 33  
 34  
 35  
 36  
 37  
 38  
 39  
 40  
 41  
 42  
 43  
 44  
 45  
 46

# BMJ Open

## Improving chronic pain management with eHealth and mHealth: study protocol for a randomized controlled trial

|                                 |                                                                                                                                                                                                                                                                                                                                                 |
|---------------------------------|-------------------------------------------------------------------------------------------------------------------------------------------------------------------------------------------------------------------------------------------------------------------------------------------------------------------------------------------------|
| Journal:                        | <i>BMJ Open</i>                                                                                                                                                                                                                                                                                                                                 |
| Manuscript ID                   | bmjopen-2019-033586.R2                                                                                                                                                                                                                                                                                                                          |
| Article Type:                   | Protocol                                                                                                                                                                                                                                                                                                                                        |
| Date Submitted by the Author:   | 12-Nov-2019                                                                                                                                                                                                                                                                                                                                     |
| Complete List of Authors:       | Jaén, Irene; Universitat Jaume I, Basic Psychology, Clinical Psychology and Psychobiology<br>Suso-Ribera, Carlos; Universitat Jaume I<br>Castilla, Diana; Universidad de Zaragoza<br>Zaragoza, Irene; Instituto de Salud Carlos III<br>García-Palacios, Azucena; Universitat Jaume I<br>Gómez Palones, Jose Luis; Hospital General de Castellon |
| <b>Primary Subject Heading</b>: | Anaesthesia                                                                                                                                                                                                                                                                                                                                     |
| Secondary Subject Heading:      | Public health                                                                                                                                                                                                                                                                                                                                   |
| Keywords:                       | chronic pain, ecological momentary assessment, ehealth, mhealth, telemonitoring                                                                                                                                                                                                                                                                 |
|                                 |                                                                                                                                                                                                                                                                                                                                                 |

SCHOLARONE™  
Manuscripts

1  
2  
3  
4 **Title:** Improving chronic pain management with eHealth and mHealth: study protocol  
5  
6 for a randomized controlled trial  
7

8  
9  
10 **Running Head:** Telemonitoring of pain by Pain Monitor App  
11  
12

13  
14 **Authors:** Irene Jaén<sup>1,a</sup>, Carlos Suso-Ribera<sup>1</sup>, Diana Castilla<sup>2,3</sup>, Irene Zaragoza<sup>3</sup>,  
15  
16 Azucena García-Palacios<sup>1,3</sup> and José Luis Gómez Palonés<sup>4</sup>  
17  
18

19  
20  
21 <sup>1</sup> Universitat Jaume I, Castelló 12007, Spain  
22

23 <sup>2</sup> Universidad de Zaragoza, Teruel 44003, Spain  
24

25 <sup>3</sup> CIBER of Physiopathology of Obesity and Nutrition CIBERObn, CB06/03 Instituto de  
26  
27 Salud Carlos III, Spain  
28

29 <sup>4</sup> Hospital General Universitari de Castelló, 12004, Spain  
30  
31

32  
33 <sup>a</sup> Corresponding author. Universitat Jaume I. Facultad de Ciencias de la Salud.  
34

35 Departamento de Psicología Básica, Clínica y Psicobiología. Avda. Vicente Sos Baynat  
36

37 s/n. Castellón de la Plana E-12071 Spain  
38

39  
40 ijaen@uji.es  
41

42  
43  
44 Trial Sponsor: Universitat Jaume I.: Avda. Vicente Sos Baynat, s/n Castellón de la  
45

46 Plana E-12071 Spain; **Telephone:** +34 964 38 74 80; e-mail: ocit@uji.es  
47  
48

49  
50  
51 Word count: 3757  
52

53 **Protocol Amendment Number:** 01  
54

|                  |                        |
|------------------|------------------------|
| 2019-July-8      | Original               |
| 2019-October-13  | 1 <sup>st</sup> review |
| 2019-November-12 | 2 <sup>nd</sup> review |

55  
56  
57  
58  
59  
60

26

1  
2  
3 **27 Abstract**  
4

5 *28 Introduction:* Chronic pain has become a matter of public health concern due to its high  
6  
7 *29 prevalence* and because public costs associated with treatment and disability increase  
8  
9 *30 each year.* Research suggests that limitations in the traditional assessment of chronic  
10  
11 *31 pain patients* limit the effectiveness of current medical treatments. The use of  
12  
13 *32 technology* might serve change patient traditional monitoring into Ecological  
14  
15 *33 Momentary Assessments*, which might be visualized by physicians live. This study  
16  
17 *34 describes* a Randomized Control Trial designed to test the utility of a technology-based  
18  
19 *35 solution* for pain telemonitoring consisting of a smartphone app for patients and a web  
20  
21 *36 application* for physicians. The goal of this study will be to explore whether this  
22  
23 *37 combination* of eHealth and mHealth improves the effectiveness of existing pain  
24  
25 *38 treatments.*

26  
27  
28 *39 Methods and analysis:* Participants will be 250 patients randomly assigned to one of  
29  
30 *40 these two conditions:* treatment as usual (TAU) and TAU+app+web. All participants will  
31  
32 *41 receive* the usual treatment for their pain. Only the TAU+app+web group use Pain  
33  
34 *42 Monitor* app, which generates alarms that are sent to the physicians in the face of  
35  
36 *43 previously-established* undesired events. Physicians will be able to monitor app reports  
37  
38 *44 using* a web application, which might result in an adjustment of treatment. We  
39  
40 *45 anticipate* that the use of Pain Monitor plus the therapist web will result in a reduction of  
41  
42 *46 pain intensity* and side effects of the medication. Improvements on secondary  
43  
44 *47 outcomes*, namely fatigue, mood, pain interference, rescue medication use, and quality  
45  
46 *48 of life*, are also expected. Mixed repeated-measure MANOVAs will be conducted to  
47  
48 *49 investigate* whether there are differences between pre- and post-assessment scores as  
49  
50 *50 a function* of the experimental condition.

51  
52 *51 Ethics and dissemination:* Ethical approval from the Hospital General Universitari de  
53  
54 *52 Castellon* was obtained. The findings will be published in peer-reviewed journals.

55  
56 *53 Trial registration:* NCT03606265. The trial is active. Recruitment is ongoing.  
57  
58  
59  
60

1  
2  
3 55 **Keywords:** Chronic pain, ecological momentary assessment, ehealth, mhealth,  
4  
5 56 telemonitoring.  
6  
7 57

8  
9 58 **Strengths and limitations of this study**

- 10  
11 59 – In the present randomized, controlled clinical, an integrative e-health and m-  
12 health solution for chronic pain management is implemented.  
13  
14 60  
15  
16 61 – Patient monitoring is performed remotely in an ecological and momentary  
17 manner with a smartphone app.  
18 62  
19  
20 63 – Patient responses to the app might generate alarms in the presence of  
21 unwanted clinical events.  
22 64  
23  
24 65 – Physicians can track patient evolution at any time on a website and receive  
25 clinical alarms daily.  
26 66  
27  
28 67 – Study limitations include the fact that physicians are not blinded to the patients'  
29 condition and the rigidity of the app assessment protocol.  
30 68  
31  
32  
33 69

34  
35 70 **Introduction**

36  
37 71 Pain can be defined as “an unpleasant sensory and emotional experience associated  
38 with actual or potential tissue damage, or described in terms of such damage” (1) and  
39 72 can only be understood as an interplay between “sensory, emotional, cognitive, and  
40 social components” (2). Although pain often is acute and disappears as tissues heal,  
41 73 sometimes pain persists for long periods of time and becomes chronic. For instance, it  
42 has been reported that 15% of individuals admitted to trauma hospitals due to a severe  
43 74 injury and 15- 60% of patients after surgery will continue to experience chronic pain  
44 months and years later (3). In general, a cut-off of 3 to 6 months is used to define the  
45 75 transition from acute/subacute to chronic pain (4).  
46  
47 76 The aforementioned chronification of pain is becoming a major public health problem  
48 across the globe (5). We refer here to primary chronic pain, a pain associated with  
49 77 important interference on functioning and/or emotional distress which cannot be better  
50  
51  
52  
53  
54  
55  
56  
57  
58  
59  
60 82

1  
2  
3 83 accounted for by any other condition (6). Specifically, epidemiological studies indicate  
4  
5 84 that the prevalence of this disease in the adult population ranges from 19% to 38%  
6  
7 85 worldwide (7–10). Furthermore, the increase in life expectancy and the ageing of the  
8  
9 86 population is likely to have an important impact on the number of individuals  
10  
11 87 experiencing chronic pain, since the prevalence of this syndrome boosts dramatically  
12  
13 88 with age (11). For instance, it is expected that the population of chronic pain individuals  
14  
15 89 will be doubled in 2050 for people older than 65 years and tripled for people over 80  
16  
17 90 years of age (12). Thus, chronic pain is a major public health challenge due to its high  
18  
19 91 prevalence in the population and high direct and indirect costs for the institutions and  
20  
21 92 the individuals (13,14).  
22  
23  
24 93 Indeed, chronic primary pain (e.g., fibromyalgia or nonspecific low back or neck pain, to  
25  
26 94 name some examples) is imposing a huge burden in our societies as this disease has  
27  
28 95 become one of the leading causes of years lived with disability globally (15,16) Not  
29  
30 96 surprisingly, as a result of the growing concern about this disease, there have been  
31  
32 97 numerous attempts to improve treatments for pain in the past decades. However,  
33  
34 98 recent reviews on the effectiveness of numerous interventions, including medical  
35  
36 99 treatments, psychological therapy, physical rehabilitation, or a combination of these  
37  
38 100 indicate that the effectiveness of existing treatments is, on average, only modest (17–  
39  
40 101 19). While there might be numerous factors explaining the limited effectiveness of  
41  
42 102 current interventions for pain, including unexplored biomechanical mechanisms or  
43  
44 103 genetic factors, patient characteristics, or therapists' training, some authors have  
45  
46 104 pointed to methodological shortcomings as key elements explaining the modest  
47  
48 105 effectiveness of pain interventions. Specifically, the way assessment is currently  
49  
50 106 performed (i.e., a single measure of pain intensity performed episodically during onsite  
51  
52 107 appointments) has been argued to impact negatively in the ability of existing  
53  
54 108 interventions to achieve more reliable and powerful changes in patient outcomes  
55  
56 109 (20,21). For instance, a single rate of pain intensity has been shown to be an unreliable  
57  
58 110 measure of pain as this experience can vary dramatically within the same day and  
59  
60

1  
2  
3 111 across days (22–24). In addition, pain is frequently assessed retrospectively, which is  
4  
5 112 known to lead to recall bias and to decrease the accuracy of pain ratings (25) and does  
6  
7 113 not allow for timely responses to undesired events, so these often take place time after  
8  
9 114 the problem occurred (21).

11 115 As a consequence of the above, Ecological Momentary Assessment (EMA), which  
12  
13 116 refers to the assessment of pain repeatedly and in real life, has received renewed  
14  
15 117 interest in the past years in the pain literature and is now considered by many as the  
16  
17 118 gold standard method to assess the pain experience (26–29). Traditionally, EMA has  
18  
19 119 been difficult due to the limitations and costs of repeated measurement procedures  
20  
21 120 (i.e., paper diaries or phone calls). However, with the explosion and availability of  
22  
23 121 smartphones, EMA has become easier than ever and immediate communication  
24  
25 122 between the patient and the physician is now a more feasible practice (30).

26  
27 123 It has been argued that this change in the assessment paradigm towards ecological  
28  
29 124 daily telemonitoring using apps will improve treatment effectiveness and reduce costs if  
30  
31 125 used to respond to patient reports quickly (21,31). Indeed, there is evidence to suggest  
32  
33 126 that smartphones are useful tools to be used for the assessment of pain core outcome  
34  
35 127 measures in chronic pain settings (21,32,33). However, the extent to which this EMA of  
36  
37 128 pain patients can effectively lead to better practices in pain medicine is still unknown.

38  
39 129 For this purpose, we developed a technology-based solution that integrated a pain and  
40  
41 130 symptom tracking app for patients and a web for physicians where app-generated  
42  
43 131 alarms are received daily and patient app responses can be monitored in real time. To  
44  
45 132 the best of our knowledge, no study has yet investigated the utility of using such an  
46  
47 133 integrative technology-based solution for remote, ecological monitoring of patient  
48  
49 134 evolution and to adjust treatment in response to app alarms in a randomized controlled  
50  
51 135 trial.

52  
53 136 With the previous goal in mind, in the present parallel group, superiority trial we will use  
54  
55 137 the *Pain Monitor* app  
56  
57 138 (<https://play.google.com/store/apps/details?id=painmonitor.srccode>), which was

1  
2  
3 139 developed by a team of psychologists and an engineer with the collaboration of  
4  
5 140 physicians and nurses and has been recently validated in clinical settings (21), together  
6  
7 141 with a web for the physicians where app responses and alarms can be tracked in real  
8  
9 142 time to facilitate the professional's decision-making process. As we will explain in more  
10  
11 143 detail in the Methods section, Pain Monitor assesses a number of pain-related  
12  
13 144 outcomes (i.e., pain intensity, pain interference, anxiety and depression and use of  
14  
15 145 pain-related health resources) and the most frequent side effects of medical treatments  
16  
17 146 for pain. In the study, patients will be randomly assigned to a treatment as usual  
18  
19 147 condition (TAU) or to a TAU with the support of the patients' app and the physician's  
20  
21 148 web. We anticipate that the use of the web application linked with the smartphone app  
22  
23 149 (TAU+app+web condition) will improve the effectiveness of usual treatments resulting  
24  
25 150 in reduced pain intensity and less frequent side effects of the medication after one  
26  
27 151 month of medical treatment. Additionally, we expect that this group of patients will  
28  
29 152 present additional improvements on secondary outcomes, including mood (depression  
30  
31 153 and anxiety), pain interference, pain catastrophizing, and use of pain-related health  
32  
33 154 resources in the past month as secondary gains of reducing pain levels, as suggested  
34  
35 155 in the literature (34). We also expect that the rapid detection of treatment undesired  
36  
37 156 events will rapidly minimize threats to the patient's quality of life and mood.  
38  
39  
40  
41  
42

## 43 **Method**

### 45 *Study design*

47 160 The current investigation is a randomized superiority clinical trial composed of two  
48  
49 161 parallel groups (1:1 allocation ratio): a) TAU and b) TAU+app+web. In the study,  
50  
51 162 participants in the TAU condition receive the usual pain treatment by the physicians  
52  
53 163 working at the pain unit (i.e., pharmacological treatment or infiltration). Participants  
54  
55 164 included in TAU+app+web group receive the usual treatment for their pain plus daily  
56  
57 165 monitoring of their symptoms and pain experience with the Pain Monitor app during  
58  
59 166 one month. In the TAU+app+web condition, alarms are generated in the presence of  
60



1  
2  
3 167 previously established undesired events, which have been previously determined by  
4  
5 168 the physicians at the pain clinic (e.g., pain intensity is higher than 7 in an 11-point  
6  
7 169 numerical scale during 3 consecutive days). Physicians are able to monitor these  
8  
9 170 patients' app reports using a web application created for this purpose  
10  
11 171 (<https://monitordolor.dolortic.com/>). Thus, phone calls can be conducted in the  
12  
13 172 presence of alarms in order to change or discontinue the medical treatment when  
14  
15 173 necessary. If the study results indicate that the use of technology leads to better  
16  
17 174 outcomes, participants in the TAU condition will be informed about these findings and  
18  
19 175 will be offered the possibility to use the app after study participation. In the TAU  
20  
21 176 condition only, assessment is performed as usual, that is, using self-report measures  
22  
23 177 administered onsite at the beginning and the end of the study (1 month later).  
24  
25 178 Neither the physicians nor the patients will be blind to the treatment condition assigned.  
26  
27 179 Physicians will not be blind because they will receive alarms from the TAU+app+web  
28  
29 180 participants only. Patients will not be blind because only those in the TAU+app+web  
30  
31 181 condition will be using technology in addition to usual treatment and because patients  
32  
33 182 in the TAU condition must know that there is no telemonitoring in their condition.  
34  
35 183 The trial was registered at [clinicaltrials.gov](http://clinicaltrials.gov) in September 2018 (NCT03606265). All  
36  
37 184 items from the World Health Organization Trial Registration Data Set are showed in the  
38  
39 185 Supplementary file 1. The recruitment started at the end of the same month. SPIRIT  
40  
41 186 guidelines (Standard Protocol Items: Recommendations for Interventional Trials) were  
42  
43 187 followed to design the trial. The participant timeline (i.e., schedule of enrolment,  
44  
45 188 interventions, and assessments) is shown in Figure 1. Recruitment is currently ongoing  
46  
47 189 and is expected to end in November 2019.  
48  
49  
50

51 190

### 52 191 *Sample*

53  
54 192 Participants will be 250 consecutive chronic pain patients attending the pain clinic at  
55  
56 193 the Hospital General Universitari de Castello (Spain) for the first time. Required sample  
57  
58 194 size was calculated using G\*Power (35). Although the a priori calculation resulted in  
59  
60

1  
2  
3 195 198 participants, the sample size was increased to 250 considering a dropout rate of  
4  
5 196 27-30% based on previous studies (36,37). Thus, 125 participants were assigned to  
6  
7 197 each condition. Randomization of participants was performed by an independent  
8  
9 198 researcher using a computer-generated sequence with *Randomizer* (38). Inclusion  
10  
11 199 criteria are shown in Table 1. Only patients for whom a change in the treatment is  
12  
13 200 planned (e.g., an epidural infiltration or a change in the prescribed medication) will be  
14  
15 201 included in the study (this includes both new and consecutive patients). The reason for  
16  
17 202 doing this is that the utility of the technology is expected to be maximized during the  
18  
19 203 onset of new treatments, as opposed to those cases in which the treatment plan is  
20  
21 204 already well-established.  
22  
23  
24  
25

26 206 Table 1. Inclusion criteria

---

28 The patient is over 18 years of age

29  
30  
31 The patient has a mobile phone with Android operating system (the app is  
32 currently only available for Android, which is the operating system used by more  
33 than 80% of users in Spain) (39).  
34  
35

36 The patient has the physical ability to use the application

37  
38 A new treatment plan is started during the first week after study onset

39  
40 The patient does not present psychological and/or cognitive alterations or  
41 problems with language that make his/her participation difficult  
42  
43  
44

45 The patient voluntarily wants to participate and signs the informed consent form  
46  
47

---

48  
49 207

50  
51 208 In the study, all participants are identified using an alphanumeric code. In the case of  
52 participants in the TAU+app+web condition, this code is automatically generated by the  
53 app. Thus, the database generated by the app is anonymized and the app only collects  
54  
55 210 app. Thus, the database generated by the app is anonymized and the app only collects  
56  
57 211 the international mobile equipment identity (IMEI). The association between app codes  
58  
59 212 and patient identifiable characteristics is stored locally at the pain clinic. All data  
60

1  
2  
3 213 storage procedures follow the European law and data protection rules (European  
4  
5 214 Union General Data Protection Regulation 2016/679 of the European Parliament and of  
6  
7 215 the Council of 27 April 2016). In addition, ethical approval from the Hospital General  
8  
9 216 Universitari de Castello was obtained, in accordance with the Declaration of Helsinki.  
10  
11 217 Important protocol modifications will be notified and require the approval of the Ethics  
12  
13 218 Committee of the Hospital General Universitari de Castello. Approved changes will be  
14  
15 219 made public at [clinicaltrials.gov](http://clinicaltrials.gov). All the participants read and sign an informed consent  
16  
17 220 form before randomization (see Supplementary file 2). Patients who do not agree with  
18  
19 221 the assigned condition, are given the opportunity to be allocated to the preferred  
20  
21 222 condition, but are not used in the analyses. Any changes to modify the assigned  
22  
23 223 condition are accepted at any time during the study, again resulting in an exclusion  
24  
25 224 from the study. Changes in the medication or improvement of disease do not result in  
26  
27 225 study discontinuation. Disease worsening is not expected to be associated with the  
28  
29 226 inclusion of the app but, if existent, will result in the discontinuation of app use.  
30  
31  
32  
33

227

### 228 *Procedure*

34  
35  
36 229 The study is conducted at the pain clinic of the Hospital General Universitari de  
37  
38 230 Castelló. The study is advertised by physicians to all consecutive patients attending the  
39  
40 231 pain clinic for the first time. To ensure enrolment, physicians will emphasize the  
41  
42 232 importance of active patient participation in research in general and in self-monitoring  
43  
44 233 in particular. Patients interested in participating are directed to another office where the  
45  
46 234 lead author, I.J., explains the study procedures in more detail and ensures their  
47  
48 235 eligibility. I.J. is in charge of increasing adherence to the treatment (i.e., app) by  
49  
50 236 explaining the utility of the study and by contacting patients when an alarm informing of  
51  
52 237 low app adherence (i.e., more than three consecutive days without response) is  
53  
54 238 received. All participants are provided with an information sheet and sign the informed  
55  
56 239 consent. After participation acceptance, participants are assigned to one of the  
57  
58 240 experimental conditions (TAU or TAU+app+web), which had been previously  
59  
60

1  
2  
3 241 randomized by an external researcher. All participants then complete a paper-and-  
4  
5 242 pencil assessment protocol in order to control for differences between the two  
6  
7 243 assessment formats (app vs. pen and pencil) and to compare both conditions using the  
8  
9 244 same assessment approach. In addition to this paper-and-pencil evaluation, patients in  
10  
11 245 the TAU+app+web condition download and install the Pain Monitor app into their  
12  
13 246 phones. Once they install the app, they answer to an initial assessment and then  
14  
15 247 complete two measures daily (10 am and 7 pm) during one month (study duration).  
16  
17 248 Finally, an end of study appointment is set (one month later) to conduct the post-  
18  
19 249 assessment evaluation. Due to difficulties in transportation or availability, the post-  
20  
21 250 assessment intervention can either be completed onsite or via an on-line survey.  
22  
23  
24  
25

#### 252 *Pain monitor*

253 The Pain Monitor app (Figure 2) has been developed by a group of pain psychologists  
254 and an engineer, with the collaboration of physicians and nurses specialized in pain  
255 care. Pain Monitor is composed of several pain-related items which are to be answered  
256 twice a day at preset times (10 am and 7 pm, with a two-hour flexibility) during 30 days.  
257 The app content has been previously validated with chronic pain patients at the pain  
258 unit of the Vall d'Hebron Hospital (21). This assessment protocol contains  
259 sociodemographic items (i.e., age, sex, and education level, among others) which are  
260 evaluated on the first day of app use only, as well as a number of pain-related  
261 outcomes that are evaluated daily, which have been selected following recent  
262 guidelines on core outcome domains for pain treatments (40,41). Constructs in the app,  
263 including pain intensity, pain interference, anxiety, depression, catastrophizing, social  
264 support, acceptance, and coping, among others, are measured with a single item to  
265 reduce the burden of daily assessment, each of which was adapted and validated  
266 against well-established paper-and-pencil measures (21). Additionally, the assessment  
267 protocol includes a list of side effects created *ad hoc* based on the literature findings on  
268 the most frequent adverse effects of pain treatments (42,43), as well as measures of

1  
2  
3 269 treatment adherence, use of rescue medication, neuropathic characteristics of pain,  
4  
5 270 and use of medical services in the past month. All app items can be found in  
6  
7 271 Supplementary file 3.  
8  
9

10 272 The app generates alarms in the presence of predefined events (see Supplementary  
11  
12 273 file 4 for the alarms set in the present study in collaboration with the participating  
13  
14 274 physicians). These alarms are sent to the physicians early in the morning on working  
15  
16 275 days so that they can decide whether an action from their side is required (e.g., calling  
17  
18 276 the patient and setting an earlier appointment or suggesting a change in the  
19  
20 277 medication). For this study, a website linked to the app was created for the physicians  
21  
22 278 to observe patient alarms and evolution live. Examples of the physician web are  
23  
24 279 presented in Figure 3. Physicians are only asked to check the website when an alarm  
25  
26 280 happens, but they are allowed to check any patient status at any time.  
27  
28

29 281

### 31 282 *Interventions*

32  
33 283 Five physicians at the pain clinic of the Hospital General Universitari de Castelló  
34  
35 284 participate in this study. All patients in the study receive the usual treatment for their  
36  
37 285 pain irrespective of their assigned condition. However, a change in treatment might  
38  
39 286 occur in the TAU+app+web condition at the discretion of the physicians in charge of  
40  
41 287 treatment after receiving an alarm and consulting the web page with the graphical  
42  
43 288 representation of patient app responses. As usual, patients in the TAU condition  
44  
45 289 without the app are not contacted by the physicians between appointments. It is  
46  
47 290 important to note that both patients in the TAU only and patients in the TAU+app+web  
48  
49 291 condition are allowed to attend to the emergency services or the family physician in the  
50  
51 292 event of an emergency at any stage of the study due to ethical reasons. At the end of  
52  
53 293 the study, this practice is investigated for each participant in the final assessment.  
54  
55

56 294

### 58 295 *Assessment plan*

1  
2  
3 296 All participants in the study fill in a number of questionnaires in a paper-and-pencil  
4  
5 297 format at the beginning and at the end of the study. This assessment protocol includes  
6  
7 298 sociodemographic information, sickness work absence during the past month, use of  
8  
9 299 pain-related health resources in the past month (i.e., emergency services, family  
10  
11 300 physician, or pain clinic), pain-related physical symptoms experienced in the past week  
12  
13 301 (i.e., side medication effects), the Brief Pain Inventory (pain severity and interference)  
14  
15 302 (44), the Pain Catastrophizing Scale (45), and the Hospital Anxiety and Depression  
16  
17 303 Scale (46). In addition to this paper-and-pencil evaluation, participants in the  
18  
19 304 TAU+app+web condition also install the Pain Monitor app and complete a pre-  
20  
21 305 intervention assessment in the app after the paper-and-pencil evaluation. Both baseline  
22  
23 306 assessments include the same content and are duplicated to provide further evidence  
24  
25 307 for the validity of app content. After this pretreatment evaluation, participants in the  
26  
27 308 TAU+app+web group are asked to answer to the app assessments twice a day during  
28  
29 309 one month (study duration). A push-up system notifies the patient about the need to  
30  
31 310 respond to the app evaluation at 10:00 am and 7:00 pm. These times can be adjusted  
32  
33 311 by the patient with a 2-hour flexibility from the preset times.  
34  
35 312 Daily morning and evening assessments differ in a number of items. Some items are  
36  
37 313 asked twice a day (i.e., pain intensity, sadness, anxiety), while others are only  
38  
39 314 administered in the morning (e.g., interference of pain on sleep) or in the evening (e.g.,  
40  
41 315 activity level during the day, interference of pain on daily activities, or physical  
42  
43 316 symptoms experienced during the day).  
44  
45 317 Finally, 30 days after the treatment onset (i.e., first evaluation), both groups complete a  
46  
47 318 post-assessment protocol. The measures included in this final evaluation are similar to  
48  
49 319 the ones included in the baseline assessment, with the inclusion of a measure of  
50  
51 320 negative events experienced during the study period and the evaluation of perceived  
52  
53 321 change due to treatment.  
54  
55 322 In the study, primary outcomes are pain intensity and the number of side effects of the  
56  
57 323 medication reported in the app, while secondary outcomes include mood (depression

1  
2  
3 324 and anxiety), pain interference, pain catastrophizing, and use of pain-related health  
4  
5 325 resources in the past month.  
6  
7 326 Note that app reports in the TAU+app+web condition are not used to determine  
8  
9 327 treatment effectiveness compared to the TAU only condition because in the latter  
10  
11 328 condition participants do not use the app. Therefore, app responses are only used for  
12  
13 329 telemonitoring and early detection of treatment problems that result in an alarm to the  
14  
15 330 physicians. The comparison of both conditions will be made using the traditional paper-  
16  
17 331 and-pencil evaluations which will be available for both groups. Additionally, the number  
18  
19 332 of alarms and the physician's responses to such alarms (e.g., change in treatment  
20  
21 333 strategies) will be registered. This information will be used to get better insight into the  
22  
23 334 utility of the integrated technology to improve treatment efficacy.  
24  
25

26 335

### 27 28 336 *Patient and public Involvement*

29  
30 337 In the current study, patients or the public will not be involved in the design, or conduct,  
31  
32 338 or dissemination of the research.  
33  
34

35 339

### 36 37 340 *Data analysis*

38  
39 341 The aim of the present study is to explore the effect of an integrated technology-based  
40  
41 342 solution for chronic pain monitoring (an app that monitors pain patients daily and sends  
42  
43 343 clinical alarms to physicians and a web for physicians that graphically represents  
44  
45 344 patient evolution as reported in the app) compared to the usual treatment where  
46  
47 345 monitoring is made using a paper-and-pencil, episodic, onsite evaluation. With this aim  
48  
49 346 in mind, and completer analyses will be performed following the recommendations of  
50  
51 347 the CONSORT guidelines (<http://www.consort-statement.org/>). First, the two conditions  
52  
53 348 will be compared at baseline in the different continuous measures with a between-  
54  
55 349 group analysis via a *t*-test to ensure that randomization indeed resulted in comparable  
56  
57 350 groups prior to intervention. Chi-squared tests will be used for all the categorical  
58  
59 351 variables. To evaluate our hypothesis, mixed repeated-measure MANOVAs will be  
60

1  
2  
3 352 conducted to investigate whether there are differences between pre- and post-  
4  
5 353 assessment scores as a function of the experimental condition (TAU or  
6  
7 354 TAU+app+web). Distribution normality and homoscedasticity assumptions will be  
8  
9 355 tested by means of Kolmogorov-Smirnov and Levene tests, respectively, and a  
10  
11 356 Mann-Whitney  $U$  test and Brown-Forsythe  $F$ -test will be used where necessary. Effect  
12  
13 357 size will be calculated to complement the MANOVA results with the standardized mean  
14  
15 358 difference (Cohen's  $d$ ) for both between and within group analyses. This is a novel  
16  
17 359 study and effect sizes are difficult to anticipate. However, we expect to find larger (i.e.  
18  
19 360 moderate) between-groups effect sizes for primary outcomes (i.e., pain intensity and  
20  
21 361 number of side effects of the medication) when compared to secondary outcomes  
22  
23 362 since medical interventions do not specifically focus on these symptoms (i.e., pain  
24  
25 363 interference, mood, fatigue, rescue medication use, and quality of life). The analysis will  
26  
27 364 be performed by CSR, who will be blinded to the treatment allocation. Only the present  
28  
29 365 study authors will have access to the final trial dataset.  
30  
31  
32 366 Regarding dropouts, we will choose a strict criterion and the analyses will only include  
33  
34 367 participants who complete both the pre and the post assessments. Because of the  
35  
36 368 short duration of the trial (one month per patient) and the minimal risks expected from  
37  
38 369 the use of the app, a data monitoring committee will not be required. Despite the  
39  
40 370 previous, an alarm has been set so that the physicians are warned if a patient fails to  
41  
42 371 respond to the App during three consecutive days (i.e., an indirect measure of potential  
43  
44 372 dropouts attributable to the App use). If this happens, the physicians will call the patient  
45  
46 373 and explore the reasons for discontinuation and try to obtain a post-treatment  
47  
48 374 assessment to reduce bias.  
49

50  
51 375

52  
53 376

## 54 55 377 **Discussion**

56  
57 378 Pain assessment is a complex process characterized by a high variability between and  
58  
59 379 within days, which is usually performed by clinicians using self-report, onsite, single



1  
2  
3 380 ratings which are based on recall (47,48). EMA using smartphone apps appears to be  
4  
5 381 an innovative and promising alternative to these traditional assessment methods (49)  
6  
7 382 as smartphone apps have demonstrated to be accurate tools to assess pain intensity  
8  
9 383 and related variables from the patients' home, thus facilitating telemonitoring and  
10  
11 384 contributing to the personalization of medical interventions by rapidly adjusting  
12  
13 385 treatments to every individual as a result of telemonitoring (25).  
14  
15 386 In the present study protocol, we describe a randomized controlled trial designed to  
16  
17 387 test an integrative technology-based solution for chronic pain monitoring consisting of a  
18  
19 388 web application for the healthcare professional which is linked to the patient's app (i.e.,  
20  
21 389 Pain Monitor). Specifically, we want to explore whether the use of this integrative  
22  
23 390 technology improves the effectiveness of the usual treatment for this population thanks  
24  
25 391 to telemonitoring and the rapid detection of unwanted events. We expect that the use  
26  
27 392 of Pain monitor, with the support of therapist's web, will result in reduced pain intensity  
28  
29 393 and less frequent side effects of the medication after one month of medical treatment  
30  
31 394 due to the professional's rapid reaction in the presence of undesired outcomes. Note  
32  
33 395 that the study goal is not the explore the feasibility of implementing the use of the  
34  
35 396 integrative technology for patient long-term use, but to explore its utility and  
36  
37 397 acceptability when used in the short-term (e.g., during a month) in a critical treatment  
38  
39 398 stage (i.e., after the onset of a new treatment plan, when pain is not well controlled and  
40  
41 399 treatment tolerance is unclear).  
42  
43 400 To our knowledge, this is the first study to assess the effectiveness of this type of  
44  
45 401 integrative technology solution (i.e., a therapist web site linked to a patient smartphone  
46  
47 402 app) for the telemonitoring of patient symptomatology in chronic pain. If our hypothesis  
48  
49 403 is confirmed, our findings will serve to demonstrate the feasibility and utility of  
50  
51 404 smartphones and specialized webs for therapists so that they can be implemented in  
52  
53 405 specialized care contexts (i.e., pain clinics). Likewise, our results will provide important  
54  
55 406 information about the potential benefits of smartphone apps for the personalization of  
56  
57 407 pain treatments (i.e., treatment can be rapidly personalized to a given patient as a  
58  
59  
60

1  
2  
3 408 function of individual responses reported in the app). Ultimately, this might help change  
4  
5 409 the model of care for this chronic disease (i.e., episodic, onsite assessment and  
6  
7 410 treatment), since the use of this integrative technology system allows for a continuous  
8  
9 411 and remote evaluation and intervention, providing a faster response to the patient  
10  
11 412 needs and improving self-management and empowerment of patients who attend pain  
12  
13 413 clinics as they become important agents of treatment effectiveness by being in charge  
14  
15 414 of daily reporting of pain-related experiences in the app. In sum, the results of the  
16  
17 415 present investigation could serve an important first step towards the implementation of  
18  
19 416 apps and other Information and Communication Technologies in health services.  
20  
21  
22 417

### 23 24 418 **List of Abbreviations**

25  
26 419 TAU = Treatment as usual; EMA = Ecological Momentary Assessment; IMEI =  
27  
28 420 International Mobile Equipment Identity; SPIRIT = Standard Protocol Items  
29  
30 421 Recommendations for Interventional Trials; CONSORT = Consolidated Standards of  
31  
32 422 Reporting Trials; MANOVA = Multivariate Analysis of Variance.  
33  
34  
35 423  
36  
37 424

### 38 39 425 **References**

- 40  
41  
42 426 1. Merskey H, editor. Classification of chronic pain: Descriptions of chronic pain  
43  
44 427 syndromes and definitions of pain terms. *Pain*. 1986;Suppl 3:226.  
45  
46  
47 428 2. Williams AC de C, Craig KD. Updating the definition of pain. *Pain*.  
48  
49 429 2016;157(11):2420–3.  
50  
51  
52 430 3. Lavand'homme P. The progression from acute to chronic pain. *Curr Opin*  
53  
54 431 *Anaesthesiol*. 2011;24(5):545–50.  
55  
56  
57 432 4. Treede R, Rief W, Barke A, Aziz Q, Bennett MI, Benoliel R, et al. A classification  
58  
59 433 of chronic pain for ICD-11. *Pain*. 2015;156(6):1003–7.  
60

- 1  
2  
3 434 5. Bevan S, Quadrello T, Mcgee R, Mahdon M, Vavrovsky A, Barham L. Fit for  
4  
5 435 Work pain-European report. 2009.  
6  
7  
8 436 6. Barke A, Schiller J, Rief W, Treede R-D, Falter S, Schäfer P, et al. The IASP  
9  
10 437 classification of chronic pain for ICD-11. *Pain*. 2018;160(1):88–94.  
11  
12  
13 438 7. Breivik H, Collett B, Ventafridda V, Cohen R, Gallacher D. Survey of chronic pain  
14  
15 439 in Europe: prevalence, impact on daily life, and treatment. *Eur J Pain*. 2006  
16  
17 440 May;10(4):287–333.  
18  
19  
20 441 8. Larsson C, Hansson EE, Sundquist K, Jakobsson U. Chronic pain in older  
21  
22 442 adults: prevalence, incidence, and risk factors. *Scand J Rheumatol*. 2017  
23  
24 443 Jul;46(4):317–25.  
25  
26  
27 444 9. Nahin RL. Estimates of pain prevalence and severity in adults: United States,  
28  
29 445 2012. *J Pain*. 2015 Aug;16(8):769–80.  
30  
31  
32 446 10. Häuser W, Wolfe F, Henningsen P, Schmutz G, Brähler E, Hinz A. Untying  
33  
34 447 chronic pain: Prevalence and societal burden of chronic pain stages in the  
35  
36 448 general population - A cross-sectional survey. *BMC Public Health*. 2014;14(1):1–  
37  
38 449 8.  
39  
40  
41  
42 450 11. Miró J, Paredes S, Rull M, Queral R, Miralles R, Nieto R, et al. Pain in older  
43  
44 451 adults: A prevalence study in the Mediterranean region of Catalonia. *Eur J Pain*.  
45  
46 452 2007;11(1):83.  
47  
48  
49 453 12. Vincent GE, Velkoff VA. The next four decades the older population in the United  
50  
51 454 States : 2010 to 2050. Vol. 2011, U.S. Department of Commerce. Economics  
52  
53 455 and Statistics Administration. U.S. Census Bureau. 2010.  
54  
55  
56 456 13. Breivik H, Eisenberg E, O'Brien T. The individual and societal burden of chronic  
57  
58 457 pain in Europe: The case for strategic prioritisation and action to improve  
59  
60

- 1  
2  
3 458 knowledge and availability of appropriate care. BMC Public Health. 2013;13(1).  
4  
5  
6 459 14. Frießem CH, Willweber-Strumpf A, Zenz MW. Chronic pain in primary care.  
7  
8 460 German figures from 1991 and 2006. BMC Public Health. 2009;9(1):299.  
9  
10  
11 461 15. Vos T, Barber RM, Bell B, Bertozzi-Villa A, Biryukov S, Bolliger I, et al. Global,  
12  
13 462 regional, and national incidence, prevalence, and years lived with disability for  
14  
15 463 301 acute and chronic diseases and injuries in 188 countries, 1990–2013: a  
16  
17 464 systematic analysis for the Global Burden of Disease Study 2013. Lancet. 2015  
18  
19 465 Aug;386(9995):743–800.  
20  
21  
22  
23 466 16. Blyth FM, Van Der Windt DA, Croft PR. Chronic Disabling Pain. Am J Prev Med.  
24  
25 467 2015 Jul;49(1):98–101.  
26  
27  
28 468 17. Gatchel RJ, McGeary DD, McGeary CA, Lippe B. Interdisciplinary chronic pain  
29  
30 469 management: past, present, and future. Am Psychol. 2014;69(2):119–30.  
31  
32  
33 470 18. Geneen LJ, Moore RA, Clarke C, Martin D, Colvin LA, Smith BH. Physical  
34  
35 471 activity and exercise for chronic pain in adults: an overview of Cochrane  
36  
37 472 Reviews. Cochrane database Syst Rev. 2017 Jan;1:CD011279.  
38  
39  
40  
41 473 19. Hughes LS, Clark J, Colclough JA, Dale E, McMillan D. Acceptance and  
42  
43 474 Commitment Therapy (ACT) for Chronic Pain: A Systematic Review and Meta-  
44  
45 475 Analyses. Clin J Pain. 2017 Jun;33(6):552–68.  
46  
47  
48 476 20. Dansie EJ, Turk DC. Assessment of patients with chronic pain. Br J Anaesth.  
49  
50 477 2013 Jul;111(1):19–25.  
51  
52  
53 478 21. Suso-Ribera C, Castilla D, Zaragoza I, Ribera-Canudas MV, Botella C, Garcia-  
54  
55 479 Palacios A. Validity, Reliability, Feasibility, and Usefulness of Pain Monitor: A  
56  
57 480 Multidimensional Smartphone App for Daily Monitoring of Adults With  
58  
59 481 Heterogenous Chronic Pain. Clin J Pain. 2018 Oct;34(10):900–8.

- 1  
2  
3 482 22. Jensen MP, McFarland CA. Increasing the reliability and validity of pain intensity  
4  
5 483 measurement in chronic pain patients. *Pain*. 1993 Nov;55(2):195–203.  
6  
7  
8 484 23. Kikuchi H, Yoshiuchi K, Miyasaka N, Ohashi K, Yamamoto Y, Kumano H, et al.  
9  
10 485 Reliability of recalled self-report on headache intensity: investigation using  
11  
12 486 ecological momentary assessment technique. *Cephalalgia*. 2006  
13  
14 487 Nov;26(11):1335–43.  
15  
16  
17 488 24. Kratz AL, Murphy SL, Braley TJ. Ecological Momentary Assessment of Pain,  
18  
19 489 Fatigue, Depressive, and Cognitive Symptoms Reveals Significant Daily  
20  
21 490 Variability in Multiple Sclerosis. *Arch Phys Med Rehabil*. 2017 Nov;98(11):2142–  
22  
23 491 50.  
24  
25  
26 492 25. García-Palacios A, Herrero R, Belmonte MA, Castilla D, Guixeres J, Molinari G,  
27  
28 493 et al. Ecological momentary assessment for chronic pain in fibromyalgia using a  
29  
30 494 smartphone: A randomized crossover study. *Eur J Pain*. 2014;18(6):862–72.  
31  
32  
33 495 26. Smyth JM, Stone AA. Ecological Momentary Assessment Research in  
34  
35 496 Behavioral medicine. *J Happiness Stud*. 2003 Mar;4(1):35–52.  
36  
37  
38 497 27. Shiffman S, Stone AA, Hufford MR. Ecological Momentary Assessment. *Annu*  
39  
40 498 *Rev Clin Psychol*. 2008;4(1):1–32.  
41  
42  
43 499 28. Lin W-C, Burke L, Schlenk EA, Yeh CH. Use of an Ecological Momentary  
44  
45 500 Assessment Application to Assess the Effects of Auricular Point Acupressure for  
46  
47 501 Chronic Low Back Pain. *Comput Inform Nurs*. 2018 Oct; 37(5), 276-82.  
48  
49  
50 502 29. Suso-Ribera C, Mesas Á, Medel J, Server A, Márquez E, Castilla D, et al.  
51  
52 503 Improving pain treatment with a smartphone app: study protocol for a  
53  
54 504 randomized controlled trial. *Trials*. 2018 Dec;19(1):145.  
55  
56  
57 505 30. May M, Junghaenel DU, Ono M, Stone AA, Schneider S. Ecological Momentary  
58  
59  
60

- 1  
2  
3 506 Assessment Methodology in Chronic Pain Research: A Systematic Review. J  
4  
5 507 Pain. 2018;19(7):699–716.  
6  
7  
8 508 31. Moore J. The benefits of mobile apps for patients and providers. Br J Healthc  
9  
10 509 Manag. 2012 Sep 1;18(9):465–7.  
11  
12  
13 510 32. Reynoldson C, Stones C, Allsop M, Gardner P, Bennett MI, Closs SJ, et al.  
14  
15 511 Assessing the Quality and Usability of Smartphone Apps for Pain Self-  
16  
17 512 Management. Pain Med. 2014;15(6):898–909.  
18  
19  
20 513 33. Rosser BA, Eccleston C. Smartphone applications for pain management. J  
21  
22 514 Telemed Telecare. 2011;17(6):308–12.  
23  
24  
25 515 34. Nieto R, Raichle K a, Jensen MP, Miró J. Changes in pain-related beliefs,  
26  
27 516 coping, and catastrophizing predict changes in pain intensity, pain interference,  
28  
29 517 and psychological functioning in individuals with myotonic muscular dystrophy  
30  
31 518 and facioscapulohumeral dystrophy. Clin J Pain. 2012 Jan;28(1):47–54.  
32  
33  
34 519 35. Faul F, Erdfelder E, Lang A-G, Buchner A. G\*Power 3: a flexible statistical power  
35  
36 520 analysis program for the social, behavioral, and biomedical sciences. Behav Res  
37  
38 521 Methods. 2007 May;39(2):175–91.  
39  
40  
41 522 36. Kristjansdottir OB, Fors EA, Eide E, Finset A, Stensrud TL, van Dulmen S, et al.  
42  
43 523 A smartphone-based intervention with diaries and therapist-feedback to reduce  
44  
45 524 catastrophizing and increase functioning in women with chronic widespread  
46  
47 525 pain: randomized controlled trial. J Med Internet Res. 2013 Jan;15(1):e5.  
48  
49  
50 526 37. Macea DD, Gajos K, Daglia Calil YA, Fregni F. The efficacy of Web-based  
51  
52 527 cognitive behavioral interventions for chronic pain: a systematic review and  
53  
54 528 meta-analysis. J Pain. 2010 Oct;11(10):917–29.  
55  
56  
57 529 38. Urbaniak, GC and Plous S. Research randomizer (version 4.0)[computer  
58  
59  
60

- 1  
2  
3 530 software]. Social Psychology Network. 2013.  
4  
5  
6 531 39. Kantar World Panel. Smartphone OS sales market share. 2015. Available from:  
7  
8 532 <http://www.kantarworldpanel.com/global/smartphone-os-market-share>.  
9  
10 533 Retrieved May 05, 2019.  
11  
12  
13 534 40. Kaiser U, Kopkow C, Deckert S, Neustadt K, Jacobi L, Cameron P, et al.  
14  
15 535 Developing a core outcome domain set to assessing effectiveness of  
16  
17 536 interdisciplinary multimodal pain therapy: the VAPAIN consensus statement on  
18  
19 537 core outcome domains. *Pain*. 2018 Apr;159(4):673–83.  
20  
21  
22  
23 538 41. Dworkin RH, Turk DC, Farrar JT, Haythornthwaite JA, Jensen MP, Katz NP, et  
24  
25 539 al. Core outcome measures for chronic pain clinical trials: IMMPACT  
26  
27 540 recommendations. *Pain*. 2005 Jan;113(1–2):9–19.  
28  
29  
30 541 42. Attal N, Cruccu G, Baron R, Haanpaa M, Hansson P, Jensen TS, et al. EFNS  
31  
32 542 guidelines on the pharmacological treatment of neuropathic pain: 2010 revision.  
33  
34 543 *Eur J Neurol*. 2010 Sep;17(9):1113-e88.  
35  
36  
37 544 43. Varrassi G, Müller-Schwefe G, Pergolizzi J, Orónska A, Morlion B,  
38  
39 545 Mavrocordatos P, et al. Pharmacological treatment of chronic pain – the need for  
40  
41 546 CHANGE. *Curr Med Res Opin*. 2010;26(5):1231–45.  
42  
43  
44  
45 547 44. Cleeland CS, Ryan KM. Pain assessment: global use of the Brief Pain Inventory.  
46  
47 548 *Ann Acad Med Singapore*. 1994 Mar;23(2):129–38.  
48  
49  
50 549 45. Sullivan MJL, Bishop SR, Pivik J. The Pain Catastrophizing Scale: Development  
51  
52 550 and validation. *Psychol Assess*. 1995 Dec;7(4):524–32.  
53  
54  
55 551 46. Zigmond AS, Snaith RP. The hospital anxiety and depression scale. *Acta*  
56  
57 552 *Psychiatr Scand*. 1983 Jun;67(6):361–70.  
58  
59  
60

- 1  
2  
3 553 47. Gorin, A. A., & Stone AA. Recall biases and cognitive errors in retrospective self-  
4  
5 554 reports: A call for momentary assessments. In: Baum A, Revenson T, J. Singer,  
6  
7 555 editors. Handbook of health psycholog. Mahwah, NJ: Lawrence Erlbaum; 2001.  
8  
9 556 p. 405–13.
- 11  
12 557 48. Schwarz N. Retrospective and Concurrent Self-Reports: The Rationale for Real-  
13  
14 558 Time Data Capture. In: A. Stone, S. S. Shiffman, A. Atienza & LN, editor. The  
15  
16 559 science of real-time data capture: Self-reports in health research. New York:  
17  
18 560 Oxford University Pres; 2007. p. 11–26.
- 21  
22 561 49. Alexander JC, Joshi GP. Smartphone applications for chronic pain  
23  
24 562 management : a critical appraisal. J Pain Res. 2016;9:731–4.
- 26  
27 563

30 564 **Author Statement:** All authors were strongly involved in the study conceptualization  
31  
32 565 and design and have reviewed and discussed the manuscript. IJ and CSR prepared  
33  
34 566 the first draft of the manuscript, which was then reviewed by AGP, DC, IZ, and JLG.  
35  
36 567 After changes were incorporated, a final version was approved by all authors. IJ and  
37  
38 568 JLG are currently in charge of recruitment and IJ and CSR will be in charge of data  
39  
40 569 analysis.

43  
44 570 **Funding:** Funded by *Plan de Promoci3n de la investigaci3n Universitat Jaume I*. Ref  
45  
46 571 UJI-B2016-39 and a Predoctoral Grant (PREDOC/2017/26) by the Universitat Jaume I  
47  
48 572 to IJ. The first grant allowed for the development of the technological systems used in  
49  
50 573 the study (physician website and link to the app). The second grant serves to pay the  
51  
52 574 salary of the lead researcher and predoctoral candidate, IJ.

55  
56 575 **Competing interests:** The intellectual property of the Pain Monitor app is owned by  
57  
58 576 co-authors CSR, DC, IZ, and AGP. These authors declare that they do not have any



1  
2  
3 577 competing interests to declare as they do not receive any financial gain from these  
4  
5 578 technologies.

7 579 **Ethics and dissemination:** Ethical approval from the Hospital General Universitari de  
8  
9 580 Castelló was obtained, in accordance with the Declaration of Helsinki. All participants  
10  
11 581 provided written informed consent to participate in the study. The informed consent  
12  
13 582 form was approved by the ethics committee of the Hospital General Universitari de  
14  
15 583 Castelló. The findings of this study will be published in peer-reviewed journals.  
16  
17  
18  
19  
20  
21  
22  
23  
24  
25

26 584

27 585

## 28 586 **FIGURES**

29 587 Figure 1. Study schedule of enrolment, interventions, and assessments.

30  
31  
32 588 Figure 2. a) Pain Monitor Instructions; b) Pain Monitor assessment of pain intensity; c)  
33  
34 589 Pain Monitor assessment of fatigue.

35  
36  
37 590 Figure 3. Examples of the web for the physician. a) Patient's side effects during 30  
38  
39 591 days. b) Patient morning values on Pain, Fatigue and Interference on sleep. c)  
40  
41 592 Distribution of patient side effects.  
42  
43  
44  
45  
46  
47  
48  
49  
50  
51  
52  
53  
54  
55  
56  
57  
58  
59  
60

593

## STUDY PERIOD

|                           | Pre-intervention        | Intervention period        | Close-out                  |
|---------------------------|-------------------------|----------------------------|----------------------------|
| TIMEPOINT                 | 0                       | $T_1$                      | $T_2$                      |
|                           | <i>Pre-Intervention</i> | <i>Between assessments</i> | <i>One month follow-up</i> |
| <b>ENROLMENT:</b>         |                         |                            |                            |
| Eligibility screen        | X                       |                            |                            |
| Informed consent          | X                       |                            |                            |
| Allocation                | X                       |                            |                            |
| <b>INTERVENTIONS:</b>     |                         |                            |                            |
| Medical treatment         |                         | X                          |                            |
| App use                   |                         | App condition only         |                            |
| <b>ASSESSMENTS:</b>       |                         |                            |                            |
| Demographics              | X                       |                            | X                          |
| <b>Primary outcomes</b>   |                         |                            |                            |
| Pain intensity            | X                       | App condition only         | X                          |
| Physical symptoms         | X                       | App condition only         | X                          |
| <b>Secondary outcomes</b> |                         |                            |                            |
| Pain interference         | X                       | App condition only         | X                          |
| Mood                      | X                       | App condition only         | X                          |
| Fatigue                   | X                       | App condition only         | X                          |
| Rescue medication         | X                       | App condition only         | X                          |
| Quality of life           | X                       | App condition only         | X                          |



a) Pain Monitor Instructions; b) Pain Monitor assessment of pain intensity; c) Pain Monitor assessment of fatigue.

289x168mm (300 x 300 DPI)

1  
2  
3  
4  
5  
6  
7  
8  
9  
10  
11  
12  
13  
14  
15  
16  
17  
18  
19  
20  
21  
22  
23  
24  
25  
26  
27  
28  
29  
30  
31  
32  
33  
34  
35  
36  
37  
38  
39  
40  
41  
42  
43  
44  
45  
46  
47  
48  
49  
50  
51  
52  
53  
54  
55  
56  
57  
58  
59  
60

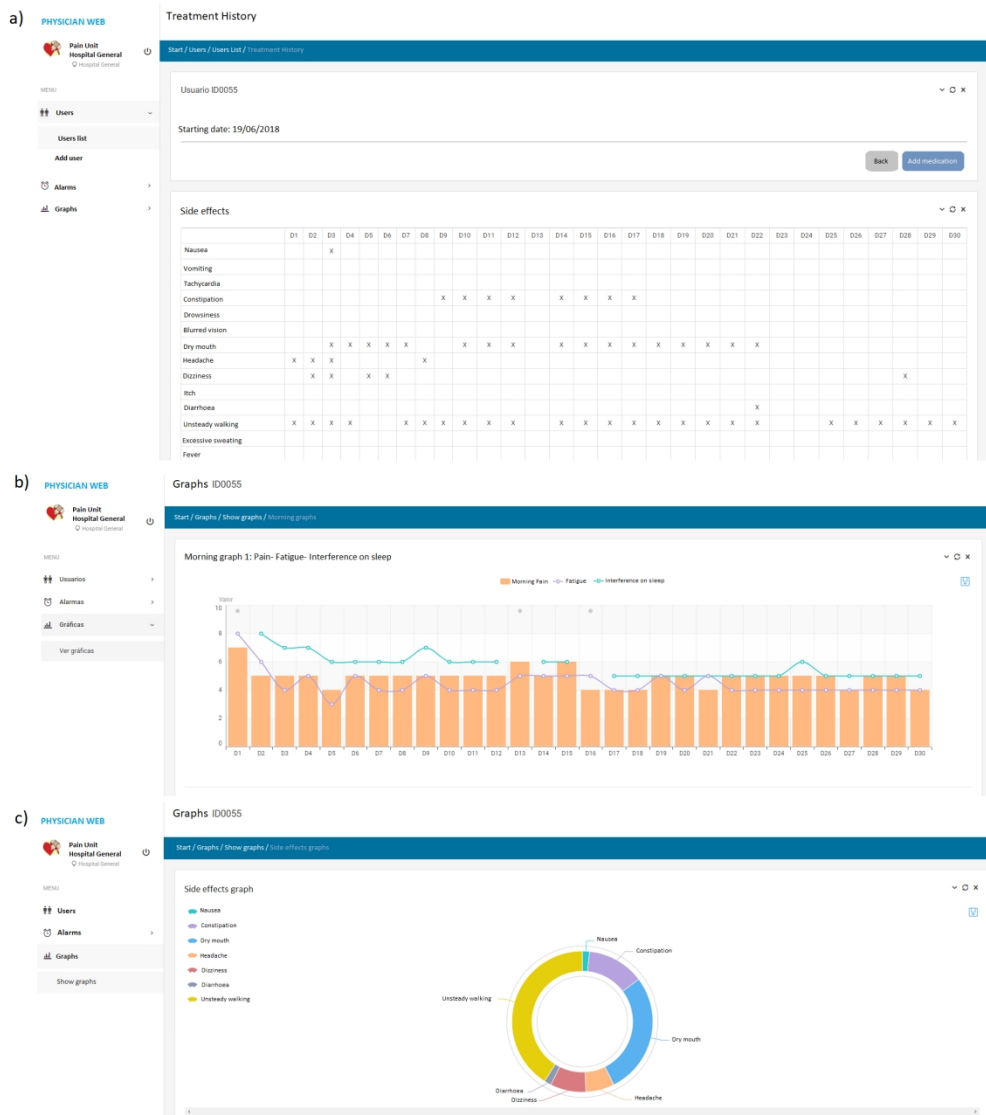

Examples of the web for the physician. a) Patient’s side effects during 30 days. b) Patient morning values on Pain, Fatigue and Interference on sleep. c) Distribution of patient side effects.

168x189mm (300 x 300 DPI)

### Supplement 1. WHO registration dataset

| <b>Data category</b>                          | <b>Information</b>                                                                                                                                                                                                                                                                                                                                                                                                                                                                                                                                                                                                                                                                                                                                                                                                                                                                                                                    |
|-----------------------------------------------|---------------------------------------------------------------------------------------------------------------------------------------------------------------------------------------------------------------------------------------------------------------------------------------------------------------------------------------------------------------------------------------------------------------------------------------------------------------------------------------------------------------------------------------------------------------------------------------------------------------------------------------------------------------------------------------------------------------------------------------------------------------------------------------------------------------------------------------------------------------------------------------------------------------------------------------|
| Primary registry and trial identifying number | ClinicalTrials.gov<br>NCT03606265                                                                                                                                                                                                                                                                                                                                                                                                                                                                                                                                                                                                                                                                                                                                                                                                                                                                                                     |
| Date of registration in primary registry      | July 30, 2018                                                                                                                                                                                                                                                                                                                                                                                                                                                                                                                                                                                                                                                                                                                                                                                                                                                                                                                         |
| Secondary identifying numbers                 | UJI-B2016-39,                                                                                                                                                                                                                                                                                                                                                                                                                                                                                                                                                                                                                                                                                                                                                                                                                                                                                                                         |
| Source(s) of monetary of material support     | Universitat Jaume I                                                                                                                                                                                                                                                                                                                                                                                                                                                                                                                                                                                                                                                                                                                                                                                                                                                                                                                   |
| Primary sponsor                               | Universitat Jaume I                                                                                                                                                                                                                                                                                                                                                                                                                                                                                                                                                                                                                                                                                                                                                                                                                                                                                                                   |
| Secondary sponsor(s)                          | None                                                                                                                                                                                                                                                                                                                                                                                                                                                                                                                                                                                                                                                                                                                                                                                                                                                                                                                                  |
| Contact for public queries                    | +34 964387640 azucena@uji.es                                                                                                                                                                                                                                                                                                                                                                                                                                                                                                                                                                                                                                                                                                                                                                                                                                                                                                          |
| Contact for scientific queries                | +34 964387649 ijaen@uji.es                                                                                                                                                                                                                                                                                                                                                                                                                                                                                                                                                                                                                                                                                                                                                                                                                                                                                                            |
| Public title                                  | Utility od a Web-based App for Chronic Pain                                                                                                                                                                                                                                                                                                                                                                                                                                                                                                                                                                                                                                                                                                                                                                                                                                                                                           |
| Scientific title                              | Improving chronic pain management with eHealth and mHealth: study protocol for a randomized controlled trial                                                                                                                                                                                                                                                                                                                                                                                                                                                                                                                                                                                                                                                                                                                                                                                                                          |
| Countries of recruitment                      | Spain                                                                                                                                                                                                                                                                                                                                                                                                                                                                                                                                                                                                                                                                                                                                                                                                                                                                                                                                 |
| Health condition(s) or problem(s) studied     | Chronic pain                                                                                                                                                                                                                                                                                                                                                                                                                                                                                                                                                                                                                                                                                                                                                                                                                                                                                                                          |
| Intervention(s)                               | Device: Treatment as usual+App+Web<br>Device: Treatment as usual                                                                                                                                                                                                                                                                                                                                                                                                                                                                                                                                                                                                                                                                                                                                                                                                                                                                      |
| Key inclusion and exclusion criteria          | <p><b>Inclusion Criteria:</b></p> <p>The patient is over 18 years of age<br/> The patient has a mobile phone with Android operating system<br/> The patient has the physical ability to use the application<br/> The patient does not present psychological and / or cognitive alterations or problems with language that make their participation difficult<br/> The patient voluntarily wants to participate and signs the informed consent</p> <p><b>Exclusion Criteria:</b></p> <p>The patient is under 18 years<br/> The patient does not have a mobile phone or has a mobile phone in which Android is not the operating system (the app is currently only available for Android for economic reasons)<br/> The patient does not have the physical capacity to use the application<br/> The patient does not have the capacity to participate due to psychological and / or cognitive alterations or problems with language</p> |

|                         |                                                                                                                                                                          |
|-------------------------|--------------------------------------------------------------------------------------------------------------------------------------------------------------------------|
|                         | The patient does not want to participate                                                                                                                                 |
| Study type              | Interventional                                                                                                                                                           |
| Date of first enrolment | August, 2018                                                                                                                                                             |
| Target sample size      | 250                                                                                                                                                                      |
| Recruitment status      | Ongoing                                                                                                                                                                  |
| Primary outcome(s)      | Changes in pain intensity and side effects                                                                                                                               |
| Key secondary outcomes  | Changes in pain-related variables as mood (depression and anxiety), pain interference, pain catastrophizing, and use of pain-related health resources in the past month. |

For peer review only

## Supplement 2: Study information sheet and informed consent

### INFORMATION ABOUT THE STUDY

You have shown your interest in participating in a scientific study of Universitat Jaume I and the Hospital General de Castellón. Your participation in the study is completely voluntary. You will then be asked to provide us with your written consent to participate in this study. There will be no inconvenience if you do not wish to participate and your decision will in no way affect the treatment received at the Hospital General de Castellón. In addition, you may discontinue your participation at any time. Please, read the following text carefully and do not hesitate to ask any questions.

#### Why is this study being carried out?

This study is part of a project called "DOLOR-TIC. Development and validation of an eHealth network for chronic pain" (REF: UJI-B2016-39) funded by the Plan de Promoción de la investigación Universitat Jaume I. The general objective of this project is to explore the benefits of using a network of technologies for the evaluation and treatment of chronic pain. The treatment by means of new technologies will be compared with the usual treatment provided in the pain unit of the Hospital General de Castellón.

#### What will be the procedure implemented in the study?

In the first sessions we will examine your state of health and check whether it meets the criteria for inclusion in the study. If you meet the established inclusion criteria, you will then be assigned to one of two study conditions: a) Habitual Treatment (TAU) or b) TAU supported by new technologies (TAU+ICTs). You will receive this treatment for 1 month and your clinical status will be evaluated before starting treatment, at the end of treatment (1 month). If, in fact, the treatments supported by the new technologies prove to be more effective than the usual treatment, you will be offered the possibility of benefiting from the treatment of new technologies at the end of the study, whether you were initially assigned to the TAU condition or to the TAU+TICs condition.

#### Are there any risks associated with my participation?

According to existing knowledge, the evaluation and treatment protocol used in this study does not pose risks to participants.

#### What are the possible benefits of my participation?

The treatment protocols included in this study are designed to improve your health. Your participation in this study will contribute to improving the health of a large number of citizens of the Spanish state. In addition, if the objectives of the study are achieved, the results will lead to a significant reduction in treatment costs and a

1  
2  
3 reduction in the increase in access to health services for a large number of people who  
4 do not have access to health services suffer from mental disorders.  
5

### 6 **How will my data be treated?**

7  
8 All data relevant to the study will be collected and stored in compliance with data  
9 protection regulations in force. These data will only be used anonymously for the  
10 purpose of scientific analysis. All persons involved in the study have an obligation to  
11 comply with data protection laws. We will make sure that all your information - without  
12 restrictions - is treated as in a confidential manner. Any data collected will be deleted as  
13 soon as it is not necessary for scientific purposes.  
14  
15  
16

### 17 **Can I decline or suspend my participation?**

18  
19 Yes, you may refuse to participate in this study or terminate your participation at any  
20 time. In the event that you decide to discontinue your participation in the study all of  
21 your data will be destroyed immediately.  
22  
23

### 24 **Who is the researcher responsible for the study?**

25  
26 Dr. Azucena García Palacios, Department of Basic Psychology, Clinic and  
27 Psychobiology, Universitat Jaume I (Castellón de la Plana), Tel: 964 387 640, E-mail:  
28 azucena@uji.es  
29

30  
31 You may contact the principal investigator if you have any questions, concerns about  
32 the study, about the data being collected, or if you wish to make use of your right to  
33 suspend your participation.  
34  
35  
36  
37  
38  
39  
40  
41  
42  
43  
44  
45  
46  
47  
48  
49  
50  
51  
52  
53  
54  
55  
56  
57  
58  
59  
60



## INFORMED CONSENT

Study DOLOR-TIC. Development and validation of an eHealth network for chronic pain. REF: UJI-B2016-39.

I (first name and last name) \_\_\_\_\_

- I have read the information sheet given to me.
- I was able to ask questions about the study.
- I have received enough information about the study.

I've been talking to: \_\_\_\_\_ (name of researcher).

I understand that my participation is voluntary.

I understand that I can withdraw from the study:

1. When I want to
2. Without having to give explanations
3. Without this affecting my medical care

I freely give my consent to participate in the study.

Date: .../ ... /...

Date: .../ ... /...

Participant's signature:

Researcher's signature:

### Revocation of consent:

I revoke the consent given on ..../..../..... and I do not wish to continue in the study that

I give on this date for finished.

Signature of participant:

Signature of investigator:

### Supplement 3: Items in the Pain Monitor app

*Items assessed once, the first day of app use:*

1. Please indicate your date of birth (DD/MM/YYYY)
2. Please indicate your gender:
  - a. Male
  - b. Female
3. Please indicate your type of pain. You may select more than one option:
  - a. Fibromyalgia
  - b. Low back pain
  - c. Cervical pain
  - d. Rheumatoid arthritis
  - e. Osteoarthritis; Headache
  - f. Neuropathic pain
  - g. Cancer pain
  - h. None of the above
4. If you selected “None of the above” please indicate your type of pain. Otherwise, leave this question blank. Press OK to continue.
5. Please indicate the location where your pain is more intense:
  - a. Head
  - b. Shoulder
  - c. Neck
  - d. High back
  - e. Lower back
  - f. Arm
  - g. Elbow
  - h. Wrist
  - i. Hand
  - j. Abdomen
  - k. Chest
  - l. Buttock
  - m. Hip
  - n. Leg
  - o. Knee
  - p. Foot
  - q. Whole body
  - r. Somewhere not listed
6. Who is currently treating your pain? You may select more than one option:
  - a. General practitioner
  - b. Rheumatologist
  - c. Orthopedic specialist
  - d. Rehabilitation physician
  - e. Psychiatrist
  - f. Pain Unit

- 1  
2  
3 g. Neurosurgeon  
4 h. Neurologist  
5 i. Oncologist  
6 j. Another professional.  
7  
8  
9 7. When did your current pain start?  
10 a. Less than one year ago  
11 b. Between 1 and 5 years ago  
12 c. Between 5 and 10 years ago  
13 d. More than 10 years ago  
14  
15  
16 8. What is your current treatment for pain? You may select more than one option:  
17 a. Physiotherapy  
18 b. Pharmacotherapy  
19 c. Infiltrations  
20 d. Psychological treatment  
21 e. Natural / alternative treatments  
22 f. My pain is not being treated  
23  
24  
25 9. Did you start a new treatment for pain in the last month?  
26 a. Yes  
27 b. No  
28  
29  
30 10. Please select the treatment/s you started in the last month. You may select more  
31 than one option:  
32 a. Physiotherapy  
33 b. Pharmacotherapy  
34 c. Infiltrations  
35 d. Psychological treatment  
36 e. Natural / alternative treatments  
37 f. I have not started a new treatment  
38  
39  
40 11. What is your marital status?  
41 a. Single  
42 b. Married  
43 c. In a relationship  
44 d. Divorced  
45 e. Separated  
46 f. Widowed  
47  
48  
49 12. What is your job status?  
50 a. Active worker  
51 b. Sick leave  
52 c. Permanent disability  
53 d. Unemployed  
54 e. Homemaker  
55 f. Retired  
56 g. Student  
57  
58  
59 13. What is the highest level of education you have completed?  
60

- 1
- 2
- 3 a. No studies
- 4 b. Less than high school
- 5 c. High school graduate
- 6 d. Technical training
- 7 e. University degree
- 8
- 9

10 14. Do you currently have a diagnosis of depression by a physician or a  
11 psychologist?

- 12 a. Yes
- 13 b. No
- 14
- 15

16 15. Do you currently have a diagnosis of anxiety by a physician or a psychologist?

- 17 a. Yes
- 18 b. No
- 19
- 20
- 21

22 *Items assessed twice a day and in the event of acute pain episodes:*

23 16. Please indicate the intensity of your CURRENT PAIN:

24 0 No pain -----10 Extreme pain

25 17. Please indicate the intensity of your CURRENT FATIGUE:

26 0 No fatigue -----10 Extreme fatigue

27 18. Please indicate the intensity of your CURRENT HAPPINESS:

28 0 No happiness -----10 Extremely happy

29 19. Please indicate the intensity of your CURRENT SADNESS:

30 0 No sadness ----- 10 Extremely sad

31 20. Please indicate the intensity of your CURRENT ANXIETY:

32 0 No anxiety ----- 10 Extremely anxious

33 21. Please indicate the intensity of your CURRENT ANGER:

34 0 No anger ----- 10 Extremely angry

35 22. Does your pain have any of these characteristics? You may select more than one  
36 option:

- 37 a. Burning
- 38 b. Painful cold
- 39 c. Electric shocks
- 40 d. Tingling
- 41 e. Pins and needles
- 42 f. Numbness
- 43 g. Itching
- 44 h. Reduced sensitivity to touch
- 45
- 46
- 47
- 48
- 49
- 50
- 51
- 52
- 53
- 54
- 55
- 56
- 57
- 58
- 59
- 60

- 1
- 2
- 3 i. Pain when brushing against the skin
- 4 j. None of the above
- 5
- 6
- 7

8 *Items assessed in the morning:*

9

10 23. In general, your HEALTH is:

- 11 1) Very poor
- 12 2) Poor
- 13 3) Average
- 14 4) Good
- 15 5) Very good

16 24. Did your PAIN interfere with the quality of your SLEEP LAST NIGHT?

17 0 No interference ----- 10 Maximum interference

18 25. Indicate your degree of agreement with the following sentence: With my current  
19 pain, I should not do my usual job (it includes housework and work outside the  
20 home).

- 21 1) Strongly disagree
- 22 2) Disagree
- 23 3) Neither agree nor disagree
- 24 4) Agree
- 25 5) Strongly agree

26 26. Indicate your degree of agreement with the following sentence: Experiencing  
27 pain is terrible and I feel that pain is stronger than me.

- 28 1) Strongly disagree
- 29 2) Disagree
- 30 3) Neither agree nor disagree
- 31 4) Agree
- 32 5) Strongly agree

33 27. Indicate your degree of agreement with the following sentence: I need some  
34 control over pain before I can make serious plans.

- 35 1) Strongly disagree
- 36 2) Disagree
- 37 3) Neither agree nor disagree
- 38 4) Agree
- 39 5) Strongly agree

40 28. Indicate your degree of agreement with the following sentence: Physical activity  
41 aggravates my pain.

- 42 1) Strongly disagree

- 2) Disagree
- 3) Neither agree nor disagree
- 4) Agree
- 5) Strongly agree

29. Indicate your degree of agreement with the following sentence: I am living a rewarding life despite my pain.

- 1) Strongly disagree
- 2) Disagree
- 3) Neither agree nor disagree
- 4) Agree
- 5) Strongly agree

*Items assessed in the evening:*

30. Did your PAIN interfere with your ability to perform your USUAL WORK or HOUSEWORK TODAY?

0 No interference ----- 10 Maximum interference

31. Did your PAIN interfere with your LEISURE ACTIVITIES TODAY?

0 No interference ----- 10 Maximum interference

32. Did your PAIN interfere with your SOCIAL INTERACTIONS TODAY?

0 No interference ----- 10 Maximum interference

33. Which STRATEGY did you use to COPE WITH YOUR PAIN TODAY? You may select more than one option:

- a. Inactivity / rest
- b. Relaxation exercise
- c. Speak with someone
- d. Physical Activity / Stretching
- e. Self-statements to persist in a task
- f. Do something to feel positive emotions
- g. Ignore the pain/distract
- h. Pray for the pain to disappear

34. Indicate your degree of agreement with the following sentence: I fear that the pain will get worse.

- 1) Strongly disagree
- 2) Disagree
- 3) Neither agree nor disagree
- 4) Agree
- 5) Strongly agree

1  
2  
3 35. Indicate your degree of agreement with the following sentence: Today I could  
4 not keep my pain out of my mind.

- 5 1) Strongly disagree  
6 2) Disagree  
7 3) Neither agree nor disagree  
8 4) Agree  
9 5) Strongly agree  
10  
11  
12

13  
14 36. Please rate your degree of activity TODAY:  
15 0%= Completely inactive -100%= Completely active.  
16

17  
18 37. In which area have you been more active today? You may select more than one  
19 option:

- 20 a. Work  
21 b. Family  
22 c. Couple  
23 d. Friends  
24 e. Leisure  
25 f. Physical activity  
26 g. Other.  
27  
28  
29

30  
31 38. Did you take a rescue medication TODAY (i.e., medication you only use in the  
32 event of acute pain)?

- 33 a. Yes  
34 b. No  
35  
36

37  
38 39. Did you experience any of these symptoms TODAY? You may select more than  
39 one option:

- 40 a. Nausea  
41 b. Vomiting  
42 c. Tachycardia  
43 d. Constipation  
44 e. Drowsiness / sedation  
45 f. Blurred vision  
46 g. Dry mouth  
47 h. Headache  
48 i. None of the above  
49  
50  
51  
52

53  
54 40. Did you experience any of these symptoms TODAY? You may select more than  
55 one option:

- 56 a. Dizziness  
57 b. Itching  
58 c. Diarrhea  
59 d. Gait instability  
60

- e. Excessive sweating
- f. Fever
- g. Urine retention
- h. Facial redness
- i. A different symptom
- j. None of the above

41. Did you take your prescribed medication TODAY?

- a. Yes
- b. No, but I will do it later
- c. No and I do not plan to take it
- d. I haven't been prescribed a pain medication

42. How many times did you take a rescue medication TODAY?

- a. 0
- b. 1
- c. 2
- d. 3
- e. 4
- f. 5
- g. 6
- h. 7
- i. 8
- j. 9
- k. 10
- l. More than 10

*Items assessed the last day of app use:*

43. With respect to the beginning of treatment, how are you feeling NOW?

- 1) Much worse
- 2) Somewhat worse
- 3) The same
- 4) Somewhat better
- 5) Much better

44. Have you experienced any negative life event in the PAST MONTH?

- a. No
- b. Yes, but it did not affect me at all
- c. Yes, but it did not affect me much
- d. Yes and it had quite an effect on me
- e. Yes and it affected me a lot



- 1  
2  
3  
4  
5  
6  
7  
8  
9  
10  
11  
12  
13  
14  
15  
16  
17  
18  
19  
20  
21  
22  
23  
24  
25  
26  
27  
28  
29  
30  
31  
32  
33  
34  
35  
36  
37  
38  
39  
40  
41  
42  
43  
44  
45  
46  
47  
48  
49  
50  
51  
52  
53  
54  
55  
56  
57  
58  
59  
60
45. If you experienced a major negative life event in the last month, please indicate its characteristics using the list below. You may select more than one option:
- Death of a close person
  - Job problem
  - Relationship problem
  - Economic problem
  - Health problem
  - Family problem
  - An event not listed above
  - I have not experienced any major negative event this month
46. Please indicate the location where your pain is more intense:
- Head
  - Shoulder
  - Neck
  - High back
  - Lower back
  - Arm
  - Elbow
  - Wrist
  - Hand
  - Abdomen
  - Chest
  - Buttock
  - Hip
  - Leg
  - Knee
  - Foot
  - Whole body
  - Somewhere not listed
47. What is your current treatment for pain? You may select more than one option:
- Physiotherapy
  - Pharmacotherapy
  - Infiltrations
  - Psychological treatment
  - Natural / alternative treatments
  - My pain is not being treated
48. Did you start a new treatment for pain in the last month?
- Yes
  - No
49. Please select the treatment/s you started in the last month. You may select more than one option:
- Physiotherapy
  - Pharmacotherapy
  - Infiltrations
  - Psychological treatment

- 1  
2  
3 e. Natural / alternative treatments  
4 f. I have not started a new treatment  
5  
6

7 50. What is your marital status?

- 8 a. Single  
9 b. Married  
10 c. In a relationship  
11 d. Divorced  
12 e. Separated  
13 f. Widowed  
14

15  
16 51. What is your job status?

- 17 a. Active worker  
18 b. Sick leave  
19 c. Permanent disability  
20 d. Unemployed  
21 e. Homemaker  
22 f. Retired  
23 g. Student  
24  
25

26 52. Do you currently have a diagnosis of depression by a physician or a  
27 psychologist?

- 28 a. Yes  
29 b. No  
30  
31

32 53. Do you currently have a diagnosis of anxiety by a physician or a psychologist?

- 33 a. Yes  
34 b. No  
35  
36  
37  
38  
39  
40  
41  
42  
43  
44  
45  
46  
47  
48  
49  
50  
51  
52  
53  
54  
55  
56  
57  
58  
59  
60

**Supplement 4: Alarms integrated into the Pain Monitor app**

- Morning pain severity > 7 during 5 consecutive days
- Evening pain severity > 7 during 5 consecutive days
- Morning sadness >7 during 5 consecutive days
- Evening sadness >7 during 5 consecutive days
- Morning anxiety >7 during 5 consecutive days
- Evening anxiety >7 during 5 consecutive days
- Vomiting during 2 consecutive days
- Tachycardia during 2 consecutive days
- Blurred vision during 2 consecutive days
- Headache during 2 consecutive days
- Dry mouth during 2 consecutive days
- Constipation during 5 consecutive days
- Drowsiness during 5 consecutive days
- Nausea during 3 consecutive days
- Itching during 3 consecutive days
- Diarrhea during 2 consecutive days
- Fever during 2 consecutive days
- Facial redness during 2 consecutive days
- Urine retention during 2 consecutive days
- Gait instability during 3 consecutive days
- Excessive sweating during 7 consecutive days
- Dizziness during 3 consecutive days
- Treatment discontinuation during 3 consecutive days
- Rescue medication > 3 during 3 consecutive days
- Sleep interference > 7 during 5 consecutive days

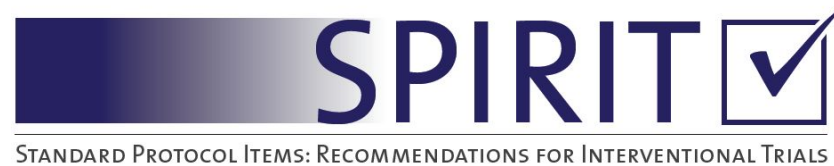

## Additional file 2: SPIRIT Checklist

SPIRIT 2013 Checklist: Recommended items to address in a clinical trial protocol and related documents\*

| Section/item                      | Item No | Description                                                                                                                                                                                                                                                                              | Addressed on page number          |
|-----------------------------------|---------|------------------------------------------------------------------------------------------------------------------------------------------------------------------------------------------------------------------------------------------------------------------------------------------|-----------------------------------|
| <b>Administrative information</b> |         |                                                                                                                                                                                                                                                                                          |                                   |
| Title                             | 1       | Descriptive title identifying the study design, population, interventions, and, if applicable, trial acronym                                                                                                                                                                             | Title, page 1                     |
| Trial registration                | 2a      | Trial identifier and registry name. If not yet registered, name of intended registry                                                                                                                                                                                                     | Abstract, page 1                  |
|                                   | 2b      | All items from the World Health Organization Trial Registration Data Set                                                                                                                                                                                                                 | Additional file 1                 |
| Protocol version                  | 3       | Date and version identifier                                                                                                                                                                                                                                                              | Protocol Amendment Number, page 1 |
| Funding                           | 4       | Sources and types of financial, material, and other support                                                                                                                                                                                                                              | Declarations, page 14             |
| Roles and responsibilities        | 5a      | Names, affiliations, and roles of protocol contributors                                                                                                                                                                                                                                  | Authors, page 1                   |
|                                   | 5b      | Name and contact information for the trial sponsor                                                                                                                                                                                                                                       | Trial sponsor, page 1             |
|                                   | 5c      | Role of study sponsor and funders, if any, in study design; collection, management, analysis, and interpretation of data; writing of the report; and the decision to submit the report for publication, including whether they will have ultimate authority over any of these activities | Declarations, page 14             |

|    |                                                           |     |                                                                                                                                                                                                                                                                  |                                              |
|----|-----------------------------------------------------------|-----|------------------------------------------------------------------------------------------------------------------------------------------------------------------------------------------------------------------------------------------------------------------|----------------------------------------------|
| 1  |                                                           | 5d  | Composition, roles, and responsibilities of the coordinating centre, steering committee, endpoint adjudication committee, data management team, and other individuals or groups overseeing the trial, if applicable (see Item 21a for data monitoring committee) | Methods, Page 12                             |
| 2  |                                                           |     |                                                                                                                                                                                                                                                                  |                                              |
| 3  |                                                           |     |                                                                                                                                                                                                                                                                  |                                              |
| 4  |                                                           |     |                                                                                                                                                                                                                                                                  |                                              |
| 5  |                                                           |     |                                                                                                                                                                                                                                                                  |                                              |
| 6  |                                                           |     |                                                                                                                                                                                                                                                                  |                                              |
| 7  | <b>Introduction</b>                                       |     |                                                                                                                                                                                                                                                                  |                                              |
| 8  |                                                           |     |                                                                                                                                                                                                                                                                  |                                              |
| 9  | Background and rationale                                  | 6a  | Description of research question and justification for undertaking the trial, including summary of relevant studies (published and unpublished) examining benefits and harms for each intervention                                                               | Introduction, page 1-3                       |
| 10 |                                                           |     |                                                                                                                                                                                                                                                                  |                                              |
| 11 |                                                           |     |                                                                                                                                                                                                                                                                  |                                              |
| 12 |                                                           | 6b  | Explanation for choice of comparators                                                                                                                                                                                                                            | Method, page 6                               |
| 13 |                                                           |     |                                                                                                                                                                                                                                                                  |                                              |
| 14 | Objectives                                                | 7   | Specific objectives or hypotheses                                                                                                                                                                                                                                | Introduction, page 3                         |
| 15 |                                                           |     |                                                                                                                                                                                                                                                                  |                                              |
| 16 |                                                           |     |                                                                                                                                                                                                                                                                  |                                              |
| 17 | Trial design                                              | 8   | Description of trial design including type of trial (eg, parallel group, crossover, factorial, single group), allocation ratio, and framework (eg, superiority, equivalence, noninferiority, exploratory)                                                        | Introduction, page 5                         |
| 18 |                                                           |     |                                                                                                                                                                                                                                                                  |                                              |
| 19 |                                                           |     |                                                                                                                                                                                                                                                                  |                                              |
| 20 |                                                           |     |                                                                                                                                                                                                                                                                  |                                              |
| 21 |                                                           |     |                                                                                                                                                                                                                                                                  |                                              |
| 22 | <b>Methods: Participants, interventions, and outcomes</b> |     |                                                                                                                                                                                                                                                                  |                                              |
| 23 |                                                           |     |                                                                                                                                                                                                                                                                  |                                              |
| 24 | Study setting                                             | 9   | Description of study settings (eg, community clinic, academic hospital) and list of countries where data will be collected. Reference to where list of study sites can be obtained                                                                               | Sample, page 6                               |
| 25 |                                                           |     |                                                                                                                                                                                                                                                                  |                                              |
| 26 |                                                           |     |                                                                                                                                                                                                                                                                  |                                              |
| 27 | Eligibility criteria                                      | 10  | Inclusion and exclusion criteria for participants. If applicable, eligibility criteria for study centres and individuals who will perform the interventions (eg, surgeons, psychotherapists)                                                                     | Table 1, page 7                              |
| 28 |                                                           |     |                                                                                                                                                                                                                                                                  |                                              |
| 29 |                                                           |     |                                                                                                                                                                                                                                                                  |                                              |
| 30 | Interventions                                             | 11a | Interventions for each group with sufficient detail to allow replication, including how and when they will be administered                                                                                                                                       | Interventions and Assessment plan, page 8-11 |
| 31 |                                                           |     |                                                                                                                                                                                                                                                                  |                                              |
| 32 |                                                           |     |                                                                                                                                                                                                                                                                  |                                              |
| 33 |                                                           |     |                                                                                                                                                                                                                                                                  |                                              |
| 34 |                                                           |     |                                                                                                                                                                                                                                                                  |                                              |
| 35 |                                                           | 11b | Criteria for discontinuing or modifying allocated interventions for a given trial participant (eg, drug dose change in response to harms, participant request, or improving/worsening disease)                                                                   | Sample, page 7-8                             |
| 36 |                                                           |     |                                                                                                                                                                                                                                                                  |                                              |
| 37 |                                                           |     |                                                                                                                                                                                                                                                                  |                                              |
| 38 |                                                           | 11c | Strategies to improve adherence to intervention protocols, and any procedures for monitoring adherence (eg, drug tablet return, laboratory tests)                                                                                                                | Procedure, page 8                            |
| 39 |                                                           |     |                                                                                                                                                                                                                                                                  |                                              |
| 40 |                                                           |     |                                                                                                                                                                                                                                                                  |                                              |
| 41 |                                                           |     |                                                                                                                                                                                                                                                                  |                                              |
| 42 |                                                           |     |                                                                                                                                                                                                                                                                  |                                              |
| 43 |                                                           |     |                                                                                                                                                                                                                                                                  |                                              |
| 44 |                                                           |     |                                                                                                                                                                                                                                                                  |                                              |
| 45 |                                                           |     |                                                                                                                                                                                                                                                                  |                                              |
| 46 |                                                           |     |                                                                                                                                                                                                                                                                  |                                              |

|    |                                                                     |     |                                                                                                                                                                                                                                                                                                                                                                                |                             |
|----|---------------------------------------------------------------------|-----|--------------------------------------------------------------------------------------------------------------------------------------------------------------------------------------------------------------------------------------------------------------------------------------------------------------------------------------------------------------------------------|-----------------------------|
| 1  |                                                                     | 11d | Relevant concomitant care and interventions that are permitted or prohibited during the trial                                                                                                                                                                                                                                                                                  | Interventions 9-10          |
| 2  | Outcomes                                                            | 12  | Primary, secondary, and other outcomes, including the specific measurement variable (eg, systolic blood pressure), analysis metric (eg, change from baseline, final value, time to event), method of aggregation (eg, median, proportion), and time point for each outcome. Explanation of the clinical relevance of chosen efficacy and harm outcomes is strongly recommended | Assessment plan, page 10-11 |
| 3  |                                                                     |     |                                                                                                                                                                                                                                                                                                                                                                                |                             |
| 4  |                                                                     |     |                                                                                                                                                                                                                                                                                                                                                                                |                             |
| 5  |                                                                     |     |                                                                                                                                                                                                                                                                                                                                                                                |                             |
| 6  |                                                                     |     |                                                                                                                                                                                                                                                                                                                                                                                |                             |
| 7  |                                                                     |     |                                                                                                                                                                                                                                                                                                                                                                                |                             |
| 8  | Participant timeline                                                | 13  | Time schedule of enrolment, interventions (including any run-ins and washouts), assessments, and visits for participants. A schematic diagram is highly recommended (see Figure)                                                                                                                                                                                               | Figure 1                    |
| 9  |                                                                     |     |                                                                                                                                                                                                                                                                                                                                                                                |                             |
| 10 |                                                                     |     |                                                                                                                                                                                                                                                                                                                                                                                |                             |
| 11 | Sample size                                                         | 14  | Estimated number of participants needed to achieve study objectives and how it was determined, including clinical and statistical assumptions supporting any sample size calculations                                                                                                                                                                                          | Sample, page 6-7            |
| 12 |                                                                     |     |                                                                                                                                                                                                                                                                                                                                                                                |                             |
| 13 |                                                                     |     |                                                                                                                                                                                                                                                                                                                                                                                |                             |
| 14 | Recruitment                                                         | 15  | Strategies for achieving adequate participant enrolment to reach target sample size                                                                                                                                                                                                                                                                                            | Procedure, Page 8           |
| 15 |                                                                     |     |                                                                                                                                                                                                                                                                                                                                                                                |                             |
| 16 |                                                                     |     |                                                                                                                                                                                                                                                                                                                                                                                |                             |
| 17 | <b>Methods: Assignment of interventions (for controlled trials)</b> |     |                                                                                                                                                                                                                                                                                                                                                                                |                             |
| 18 | <b>Allocation:</b>                                                  |     |                                                                                                                                                                                                                                                                                                                                                                                |                             |
| 19 |                                                                     |     |                                                                                                                                                                                                                                                                                                                                                                                |                             |
| 20 | Sequence generation                                                 | 16a | Method of generating the allocation sequence (eg, computer-generated random numbers), and list of any factors for stratification. To reduce predictability of a random sequence, details of any planned restriction (eg, blocking) should be provided in a separate document that is unavailable to those who enrol participants or assign interventions                       | Sample, page 7              |
| 21 |                                                                     |     |                                                                                                                                                                                                                                                                                                                                                                                |                             |
| 22 |                                                                     |     |                                                                                                                                                                                                                                                                                                                                                                                |                             |
| 23 |                                                                     |     |                                                                                                                                                                                                                                                                                                                                                                                |                             |
| 24 |                                                                     |     |                                                                                                                                                                                                                                                                                                                                                                                |                             |
| 25 |                                                                     |     |                                                                                                                                                                                                                                                                                                                                                                                |                             |
| 26 |                                                                     |     |                                                                                                                                                                                                                                                                                                                                                                                |                             |
| 27 | Allocation concealment mechanism                                    | 16b | Mechanism of implementing the allocation sequence (eg, central telephone; sequentially numbered, opaque, sealed envelopes), describing any steps to conceal the sequence until interventions are assigned                                                                                                                                                                      | Sample, page 7              |
| 28 |                                                                     |     |                                                                                                                                                                                                                                                                                                                                                                                |                             |
| 29 |                                                                     |     |                                                                                                                                                                                                                                                                                                                                                                                |                             |
| 30 |                                                                     |     |                                                                                                                                                                                                                                                                                                                                                                                |                             |
| 31 | Implementation                                                      | 16c | Who will generate the allocation sequence, who will enrol participants, and who will assign participants to interventions                                                                                                                                                                                                                                                      | Procedure, page 8           |
| 32 |                                                                     |     |                                                                                                                                                                                                                                                                                                                                                                                |                             |
| 33 |                                                                     |     |                                                                                                                                                                                                                                                                                                                                                                                |                             |
| 34 |                                                                     |     |                                                                                                                                                                                                                                                                                                                                                                                |                             |
| 35 | Blinding (masking)                                                  | 17a | Who will be blinded after assignment to interventions (eg, trial participants, care providers, outcome assessors, data analysts), and how                                                                                                                                                                                                                                      | Pages 6 and 13              |
| 36 |                                                                     |     |                                                                                                                                                                                                                                                                                                                                                                                |                             |
| 37 |                                                                     |     |                                                                                                                                                                                                                                                                                                                                                                                |                             |
| 38 |                                                                     | 17b | If blinded, circumstances under which unblinding is permissible, and procedure for revealing a participant's allocated intervention during the trial                                                                                                                                                                                                                           | Pages 6 and 13              |
| 39 |                                                                     |     |                                                                                                                                                                                                                                                                                                                                                                                |                             |
| 40 |                                                                     |     |                                                                                                                                                                                                                                                                                                                                                                                |                             |
| 41 |                                                                     |     |                                                                                                                                                                                                                                                                                                                                                                                |                             |
| 42 |                                                                     |     |                                                                                                                                                                                                                                                                                                                                                                                |                             |
| 43 |                                                                     |     |                                                                                                                                                                                                                                                                                                                                                                                |                             |
| 44 |                                                                     |     |                                                                                                                                                                                                                                                                                                                                                                                |                             |
| 45 |                                                                     |     |                                                                                                                                                                                                                                                                                                                                                                                |                             |
| 46 |                                                                     |     |                                                                                                                                                                                                                                                                                                                                                                                |                             |

## 1 **Methods: Data collection, management, and analysis**

|                                 |                         |     |                                                                                                                                                                                                                                                                                                                                                                                                              |                             |
|---------------------------------|-------------------------|-----|--------------------------------------------------------------------------------------------------------------------------------------------------------------------------------------------------------------------------------------------------------------------------------------------------------------------------------------------------------------------------------------------------------------|-----------------------------|
| 2<br>3<br>4<br>5<br>6<br>7<br>8 | Data collection methods | 18a | Plans for assessment and collection of outcome, baseline, and other trial data, including any related processes to promote data quality (eg, duplicate measurements, training of assessors) and a description of study instruments (eg, questionnaires, laboratory tests) along with their reliability and validity, if known. Reference to where data collection forms can be found, if not in the protocol | Assessment plan, page 10-12 |
| 9<br>10<br>11                   |                         | 18b | Plans to promote participant retention and complete follow-up, including list of any outcome data to be collected for participants who discontinue or deviate from intervention protocols                                                                                                                                                                                                                    | Procedure, page 9           |
| 12<br>13<br>14<br>15<br>16      | Data management         | 19  | Plans for data entry, coding, security, and storage, including any related processes to promote data quality (eg, double data entry; range checks for data values). Reference to where details of data management procedures can be found, if not in the protocol                                                                                                                                            | Sample, page 7              |
| 17<br>18<br>19<br>20<br>21      | Statistical methods     | 20a | Statistical methods for analysing primary and secondary outcomes. Reference to where other details of the statistical analysis plan can be found, if not in the protocol                                                                                                                                                                                                                                     | Data analysis, page 12-13   |
|                                 |                         | 20b | Methods for any additional analyses (eg, subgroup and adjusted analyses)                                                                                                                                                                                                                                                                                                                                     | Not applicable              |
| 22<br>23<br>24<br>25<br>26      |                         | 20c | Definition of analysis population relating to protocol non-adherence (eg, as randomised analysis), and any statistical methods to handle missing data (eg, multiple imputation)                                                                                                                                                                                                                              | Data analysis, page 12-13   |

## 27 **Methods: Monitoring**

|                                        |                 |     |                                                                                                                                                                                                                                                                                                                                       |                        |
|----------------------------------------|-----------------|-----|---------------------------------------------------------------------------------------------------------------------------------------------------------------------------------------------------------------------------------------------------------------------------------------------------------------------------------------|------------------------|
| 28<br>29<br>30<br>31<br>32<br>33<br>34 | Data monitoring | 21a | Composition of data monitoring committee (DMC); summary of its role and reporting structure; statement of whether it is independent from the sponsor and competing interests; and reference to where further details about its charter can be found, if not in the protocol. Alternatively, an explanation of why a DMC is not needed | Methods, Page 12       |
| 35<br>36<br>37                         |                 | 21b | Description of any interim analyses and stopping guidelines, including who will have access to these interim results and make the final decision to terminate the trial                                                                                                                                                               | Data analysis, page 13 |
| 38<br>39<br>40<br>41<br>42             | Harms           | 22  | Plans for collecting, assessing, reporting, and managing solicited and spontaneously reported adverse events and other unintended effects of trial interventions or trial conduct                                                                                                                                                     | Sample, page 8         |

|    |                                 |     |                                                                                                                                                                                                                                                                                     |                                 |
|----|---------------------------------|-----|-------------------------------------------------------------------------------------------------------------------------------------------------------------------------------------------------------------------------------------------------------------------------------------|---------------------------------|
| 1  | Auditing                        | 23  | Frequency and procedures for auditing trial conduct, if any, and whether the process will be independent from investigators and the sponsor                                                                                                                                         | Not applicable                  |
| 2  |                                 |     |                                                                                                                                                                                                                                                                                     |                                 |
| 3  |                                 |     |                                                                                                                                                                                                                                                                                     |                                 |
| 4  | <b>Ethics and dissemination</b> |     |                                                                                                                                                                                                                                                                                     |                                 |
| 5  |                                 |     |                                                                                                                                                                                                                                                                                     |                                 |
| 6  | Research ethics approval        | 24  | Plans for seeking research ethics committee/institutional review board (REC/IRB) approval                                                                                                                                                                                           | Declarations, page 15           |
| 7  |                                 |     |                                                                                                                                                                                                                                                                                     |                                 |
| 8  |                                 |     |                                                                                                                                                                                                                                                                                     |                                 |
| 9  | Protocol amendments             | 25  | Plans for communicating important protocol modifications (eg, changes to eligibility criteria, outcomes, analyses) to relevant parties (eg, investigators, REC/IRBs, trial participants, trial registries, journals, regulators)                                                    | Page 8                          |
| 10 |                                 |     |                                                                                                                                                                                                                                                                                     |                                 |
| 11 |                                 |     |                                                                                                                                                                                                                                                                                     |                                 |
| 12 |                                 |     |                                                                                                                                                                                                                                                                                     |                                 |
| 13 |                                 |     |                                                                                                                                                                                                                                                                                     |                                 |
| 14 | Consent or assent               | 26a | Who will obtain informed consent or assent from potential trial participants or authorised surrogates, and how (see Item 32)                                                                                                                                                        | Sample, page 8                  |
| 15 |                                 |     |                                                                                                                                                                                                                                                                                     |                                 |
| 16 |                                 |     |                                                                                                                                                                                                                                                                                     |                                 |
| 17 |                                 | 26b | Additional consent provisions for collection and use of participant data and biological specimens in ancillary studies, if applicable                                                                                                                                               | Not applicable                  |
| 18 |                                 |     |                                                                                                                                                                                                                                                                                     |                                 |
| 19 |                                 |     |                                                                                                                                                                                                                                                                                     |                                 |
| 20 | Confidentiality                 | 27  | How personal information about potential and enrolled participants will be collected, shared, and maintained in order to protect confidentiality before, during, and after the trial                                                                                                | Sample, page 7-8                |
| 21 |                                 |     |                                                                                                                                                                                                                                                                                     |                                 |
| 22 |                                 |     |                                                                                                                                                                                                                                                                                     |                                 |
| 23 | Declaration of interests        | 28  | Financial and other competing interests for principal investigators for the overall trial and each study site                                                                                                                                                                       | Declarations, page 15           |
| 24 |                                 |     |                                                                                                                                                                                                                                                                                     |                                 |
| 25 |                                 |     |                                                                                                                                                                                                                                                                                     |                                 |
| 26 | Access to data                  | 29  | Statement of who will have access to the final trial dataset, and disclosure of contractual agreements that limit such access for investigators                                                                                                                                     | Data analysis, page 13          |
| 27 |                                 |     |                                                                                                                                                                                                                                                                                     |                                 |
| 28 |                                 |     |                                                                                                                                                                                                                                                                                     |                                 |
| 29 |                                 |     |                                                                                                                                                                                                                                                                                     |                                 |
| 30 | Ancillary and post-trial care   | 30  | Provisions, if any, for ancillary and post-trial care, and for compensation to those who suffer harm from trial participation                                                                                                                                                       | Sample, page 8                  |
| 31 |                                 |     |                                                                                                                                                                                                                                                                                     |                                 |
| 32 |                                 |     |                                                                                                                                                                                                                                                                                     |                                 |
| 33 | Dissemination policy            | 31a | Plans for investigators and sponsor to communicate trial results to participants, healthcare professionals, the public, and other relevant groups (eg, via publication, reporting in results databases, or other data sharing arrangements), including any publication restrictions | Study design, page 6            |
| 34 |                                 |     |                                                                                                                                                                                                                                                                                     |                                 |
| 35 |                                 |     |                                                                                                                                                                                                                                                                                     |                                 |
| 36 |                                 |     |                                                                                                                                                                                                                                                                                     |                                 |
| 37 |                                 |     |                                                                                                                                                                                                                                                                                     |                                 |
| 38 |                                 | 31b | Authorship eligibility guidelines and any intended use of professional writers                                                                                                                                                                                                      | Authors' contributions, page 16 |
| 39 |                                 |     |                                                                                                                                                                                                                                                                                     |                                 |
| 40 |                                 |     |                                                                                                                                                                                                                                                                                     |                                 |
| 41 |                                 |     |                                                                                                                                                                                                                                                                                     |                                 |
| 42 |                                 |     |                                                                                                                                                                                                                                                                                     |                                 |
| 43 |                                 |     |                                                                                                                                                                                                                                                                                     |                                 |
| 44 |                                 |     |                                                                                                                                                                                                                                                                                     |                                 |
| 45 |                                 |     |                                                                                                                                                                                                                                                                                     |                                 |
| 46 |                                 |     |                                                                                                                                                                                                                                                                                     |                                 |



|    |                            |                                                                                                                                                                                                   |                                            |
|----|----------------------------|---------------------------------------------------------------------------------------------------------------------------------------------------------------------------------------------------|--------------------------------------------|
| 1  | 31c                        | Plans, if any, for granting public access to the full protocol, participant-level dataset, and statistical code                                                                                   | Availability of data and material, page 15 |
| 2  |                            |                                                                                                                                                                                                   |                                            |
| 3  |                            |                                                                                                                                                                                                   |                                            |
| 4  |                            |                                                                                                                                                                                                   |                                            |
| 5  |                            |                                                                                                                                                                                                   |                                            |
| 6  | <b>Appendices</b>          |                                                                                                                                                                                                   |                                            |
| 7  |                            |                                                                                                                                                                                                   |                                            |
| 8  | Informed consent materials | 32 Model consent form and other related documentation given to participants and authorised surrogates                                                                                             | Additional file 3                          |
| 9  |                            |                                                                                                                                                                                                   |                                            |
| 10 |                            |                                                                                                                                                                                                   |                                            |
| 11 | Biological specimens       | 33 Plans for collection, laboratory evaluation, and storage of biological specimens for genetic or molecular analysis in the current trial and for future use in ancillary studies, if applicable | Not applicable                             |
| 12 |                            |                                                                                                                                                                                                   |                                            |
| 13 |                            |                                                                                                                                                                                                   |                                            |

---

\*It is strongly recommended that this checklist be read in conjunction with the SPIRIT 2013 Explanation & Elaboration for important clarification on the items. Amendments to the protocol should be tracked and dated. The SPIRIT checklist is copyrighted by the SPIRIT Group under the Creative Commons "[Attribution-NonCommercial-NoDerivs 3.0 Unported](#)" license.

Peer review only
