# Supplementary material for: Improving chronic pain management with eHealth and mHealth: study protocol for a randomised controlled trial
Source: PubMed Central journal article supplement — BMJ Open. 2019 Dec 29;9(12):e033586. doi: 10.1136/bmjopen-2019-033586 (PMC6937108; doi:10.1136/bmjopen-2019-033586), 2019-12-29
Supplement: bmjopen-2019-033586supp001.pdf [file bmjopen-2019-033586supp001.pdf]

**Supplement 1. WHO registration dataset**

| <b>Data category</b>                          | <b>Information</b>                                                                                                                                                                                                                                                                                                                                                                                                                                                                                                                                                                                                                                                                                                                                                                                                                                                                                                                                                                                                                        |
|-----------------------------------------------|-------------------------------------------------------------------------------------------------------------------------------------------------------------------------------------------------------------------------------------------------------------------------------------------------------------------------------------------------------------------------------------------------------------------------------------------------------------------------------------------------------------------------------------------------------------------------------------------------------------------------------------------------------------------------------------------------------------------------------------------------------------------------------------------------------------------------------------------------------------------------------------------------------------------------------------------------------------------------------------------------------------------------------------------|
| Primary registry and trial identifying number | ClinicalTrials.gov<br>NCT03606265                                                                                                                                                                                                                                                                                                                                                                                                                                                                                                                                                                                                                                                                                                                                                                                                                                                                                                                                                                                                         |
| Date of registration in primary registry      | July 30, 2018                                                                                                                                                                                                                                                                                                                                                                                                                                                                                                                                                                                                                                                                                                                                                                                                                                                                                                                                                                                                                             |
| Secondary identifying numbers                 | UJI-B2016-39,                                                                                                                                                                                                                                                                                                                                                                                                                                                                                                                                                                                                                                                                                                                                                                                                                                                                                                                                                                                                                             |
| Source(s) of monetary of material support     | Universitat Jaume I                                                                                                                                                                                                                                                                                                                                                                                                                                                                                                                                                                                                                                                                                                                                                                                                                                                                                                                                                                                                                       |
| Primary sponsor                               | Universitat Jaume I                                                                                                                                                                                                                                                                                                                                                                                                                                                                                                                                                                                                                                                                                                                                                                                                                                                                                                                                                                                                                       |
| Secondary sponsor(s)                          | None                                                                                                                                                                                                                                                                                                                                                                                                                                                                                                                                                                                                                                                                                                                                                                                                                                                                                                                                                                                                                                      |
| Contact for public queries                    | +34 964387640 azucena@uji.es                                                                                                                                                                                                                                                                                                                                                                                                                                                                                                                                                                                                                                                                                                                                                                                                                                                                                                                                                                                                              |
| Contact for scientific queries                | +34 964387649 ijaen@uji.es                                                                                                                                                                                                                                                                                                                                                                                                                                                                                                                                                                                                                                                                                                                                                                                                                                                                                                                                                                                                                |
| Public title                                  | Utility od a Web-based App for Chronic Pain                                                                                                                                                                                                                                                                                                                                                                                                                                                                                                                                                                                                                                                                                                                                                                                                                                                                                                                                                                                               |
| Scientific title                              | Improving chronic pain management with eHealth and mHealth: study protocol for a randomized controlled trial                                                                                                                                                                                                                                                                                                                                                                                                                                                                                                                                                                                                                                                                                                                                                                                                                                                                                                                              |
| Countries of recruitment                      | Spain                                                                                                                                                                                                                                                                                                                                                                                                                                                                                                                                                                                                                                                                                                                                                                                                                                                                                                                                                                                                                                     |
| Health condition(s) or problem(s) studied     | Chronic pain                                                                                                                                                                                                                                                                                                                                                                                                                                                                                                                                                                                                                                                                                                                                                                                                                                                                                                                                                                                                                              |
| Intervention(s)                               | Device: Treatment as usual+App+Web<br>Device: Treatment as usual                                                                                                                                                                                                                                                                                                                                                                                                                                                                                                                                                                                                                                                                                                                                                                                                                                                                                                                                                                          |
| Key inclusion and exclusion criteria          | <p>Inclusion Criteria:</p> <ul style="list-style-type: none"> <li>The patient is over 18 years of age</li> <li>The patient has a mobile phone with Android operating system</li> <li>The patient has the physical ability to use the application</li> <li>The patient does not present psychological and / or cognitive alterations or problems with language that make their participation difficult</li> <li>The patient voluntarily wants to participate and signs the informed consent</li> </ul> <p>Exclusion Criteria:</p> <ul style="list-style-type: none"> <li>The patient is under 18 years</li> <li>The patient does not have a mobile phone or has a mobile phone in which Android is not the operating system (the app is currently only available for Android for economic reasons)</li> <li>The patient does not have the physical capacity to use the application</li> <li>The patient does not have the capacity to participate due to psychological and / or cognitive alterations or problems with language</li> </ul> |

|                         |                                                                                                                                                                          |
|-------------------------|--------------------------------------------------------------------------------------------------------------------------------------------------------------------------|
|                         | The patient does not want to participate                                                                                                                                 |
| Study type              | Interventional                                                                                                                                                           |
| Date of first enrolment | August, 2018                                                                                                                                                             |
| Target sample size      | 250                                                                                                                                                                      |
| Recruitment status      | Ongoing                                                                                                                                                                  |
| Primary outcome(s)      | Changes in pain intensity and side effects                                                                                                                               |
| Key secondary outcomes  | Changes in pain-related variables as mood (depression and anxiety), pain interference, pain catastrophizing, and use of pain-related health resources in the past month. |
