# Supplementary material for: Improving chronic pain management with eHealth and mHealth: study protocol for a randomised controlled trial
Source: PubMed Central journal article supplement — BMJ Open. 2019 Dec 29;9(12):e033586. doi: 10.1136/bmjopen-2019-033586 (PMC6937108; doi:10.1136/bmjopen-2019-033586), 2019-12-29
Supplement: bmjopen-2019-033586supp004.pdf [file bmjopen-2019-033586supp004.pdf]

**Supplement 4: Alarms integrated into the Pain Monitor app**

- Morning pain severity > 7 during 5 consecutive days
- Evening pain severity > 7 during 5 consecutive days
- Morning sadness >7 during 5 consecutive days
- Evening sadness >7 during 5 consecutive days
- Morning anxiety >7 during 5 consecutive days
- Evening anxiety >7 during 5 consecutive days
- Vomiting during 2 consecutive days
- Tachycardia during 2 consecutive days
- Blurred vision during 2 consecutive days
- Headache during 2 consecutive days
- Dry mouth during 2 consecutive days
- Constipation during 5 consecutive days
- Drowsiness during 5 consecutive days
- Nausea during 3 consecutive days
- Itching during 3 consecutive days
- Diarrhea during 2 consecutive days
- Fever during 2 consecutive days
- Facial redness during 2 consecutive days
- Urine retention during 2 consecutive days
- Gait instability during 3 consecutive days
- Excessive sweating during 7 consecutive days
- Dizziness during 3 consecutive days
- Treatment discontinuation during 3 consecutive days
- Rescue medication > 3 during 3 consecutive days
- Sleep interference > 7 during 5 consecutive days
